# Supplementary material for: Design and synthesis of 7-azaindole derivatives as potent CDK8 inhibitors for the treatment of acute myeloid leukemia
Source: Royal Society of Chemistry journal article supplement (doi:10.1039/d4md00465e), 2024-01-01
Supplement: d4md00465e1.pdf [file d4md00465e1.pdf]

## Supporting Information

### Design and synthesis of 7-azaindole derivatives as potent CDK8 inhibitors for the treatment of acute myeloid leukemia

Yumeng Wang<sup>a</sup>, Cencen Lei<sup>a</sup>, Quan Wang<sup>a</sup>, Xingxing Zhang<sup>a</sup>, Liping Zhi<sup>b,\*</sup>, Xinhua Liu<sup>a,\*</sup>

<sup>a</sup> School of Pharmacy, Inflammation and Immune Mediated Diseases Laboratory of Anhui Province, Anhui Medical University, Hefei, P. R. China

<sup>b</sup> School of Health Management, Anhui Medical University Hefei, 230032, PR China

## Contents

|                                                       |    |
|-------------------------------------------------------|----|
| 1. <sup>1</sup> H NMR, <sup>13</sup> C NMR, HRMS..... | S2 |
|-------------------------------------------------------|----|

1-(3-((1H-pyrrolo[2,3-b]pyridin-5-yl)oxy)phenyl)-3-(2-fluorophenyl)urea (**1**)

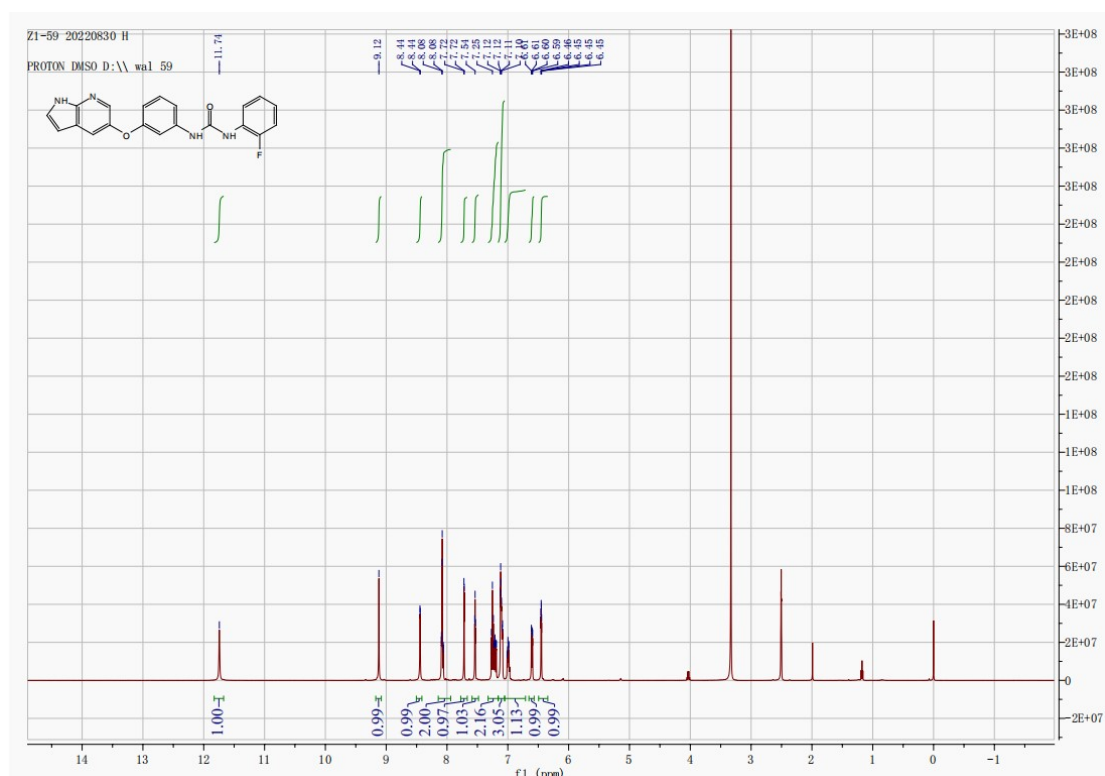

$^1\text{H}$  NMR spectrum of **1**

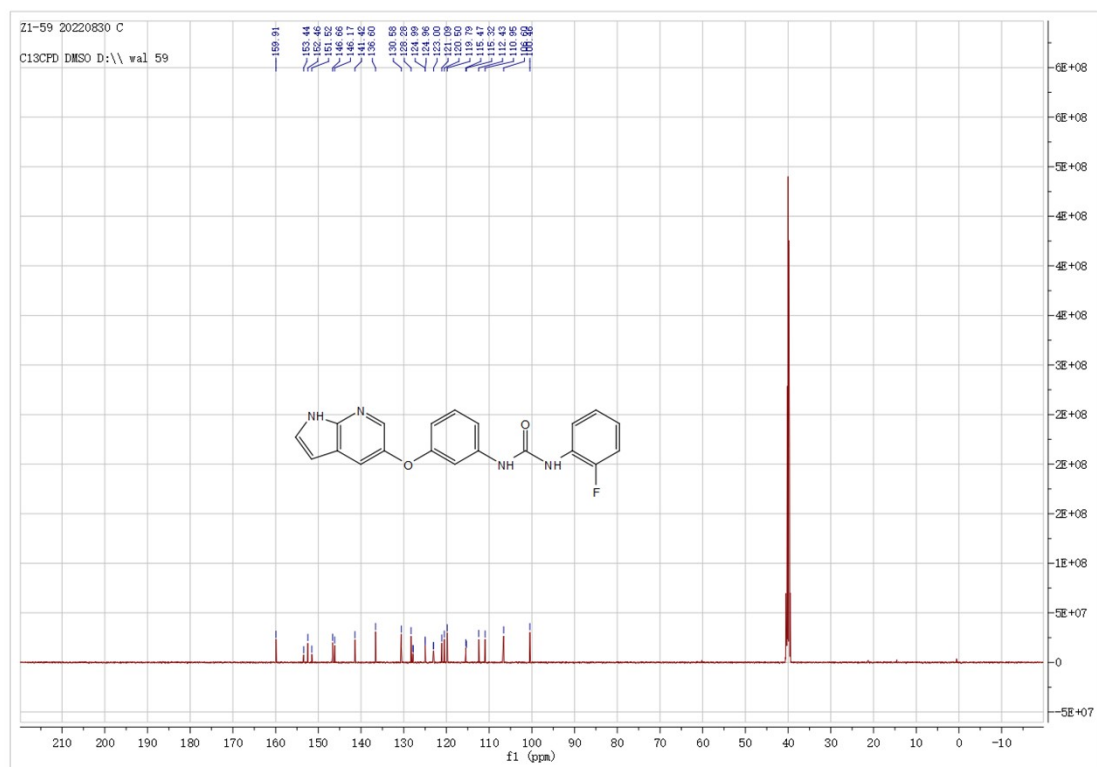

$^{13}\text{C}$  NMR spectrum of **1**

9

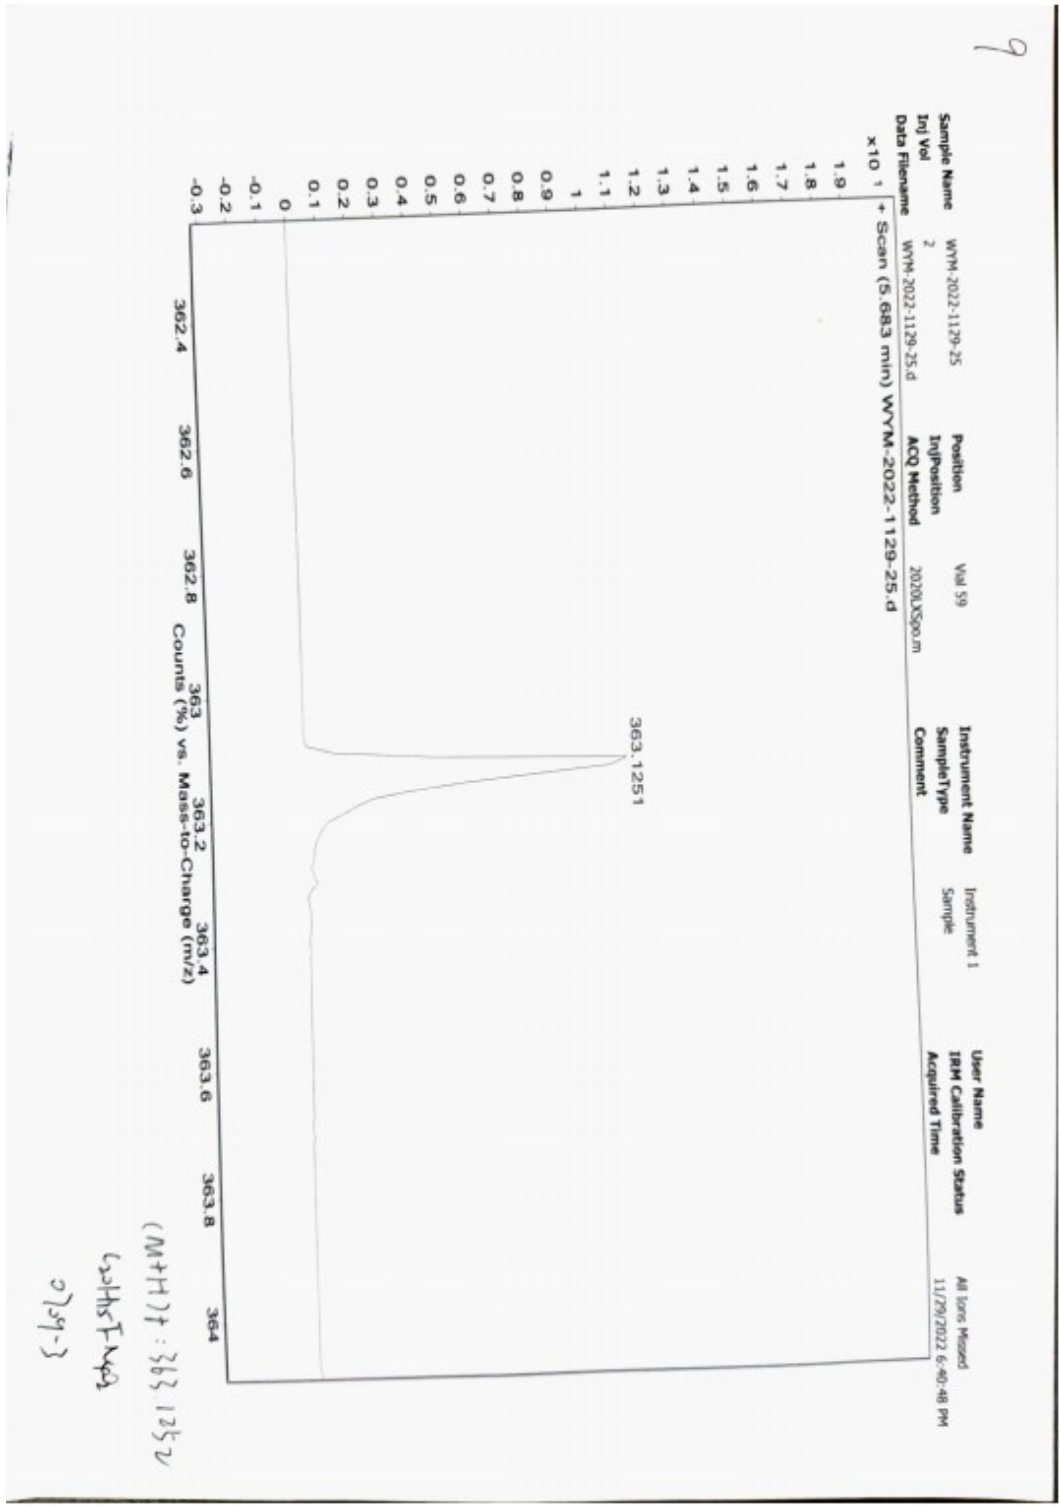

HRMS (ESI) spectrum of 1

*1-(3-((1H-pyrrolo[2,3-b]pyridin-5-yl)oxy)phenyl)-3-(2-chlorophenyl)urea (2)*

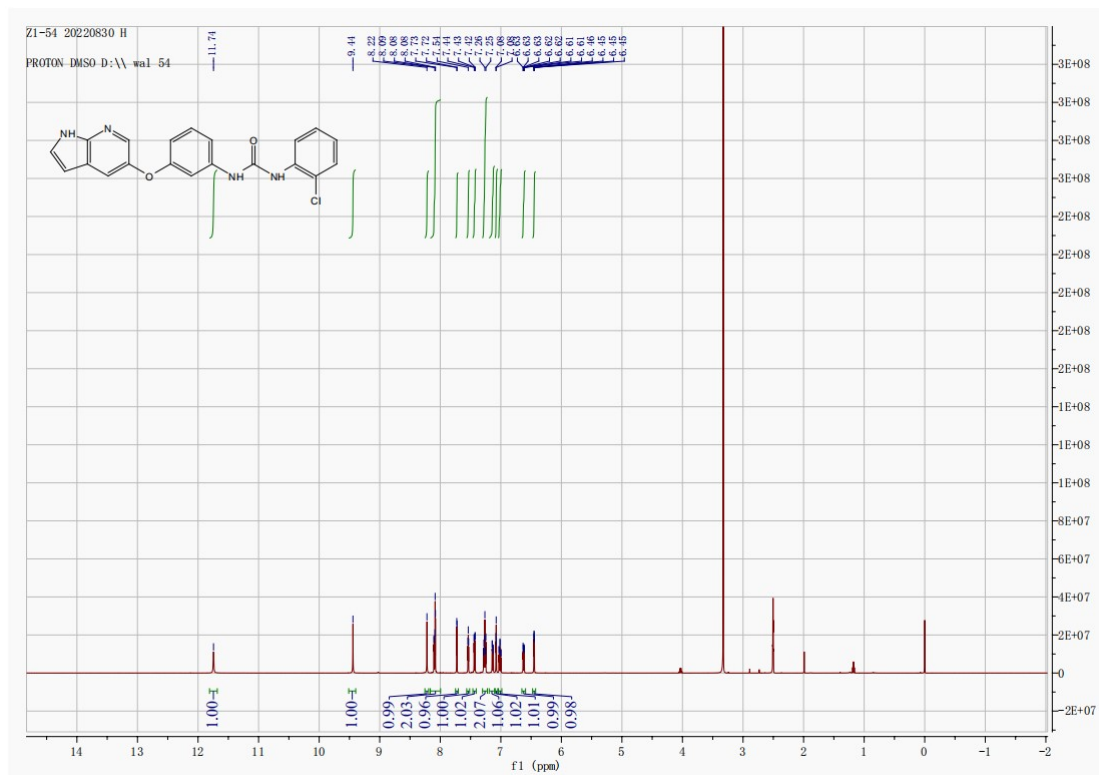

<sup>1</sup>H NMR spectrum of 2

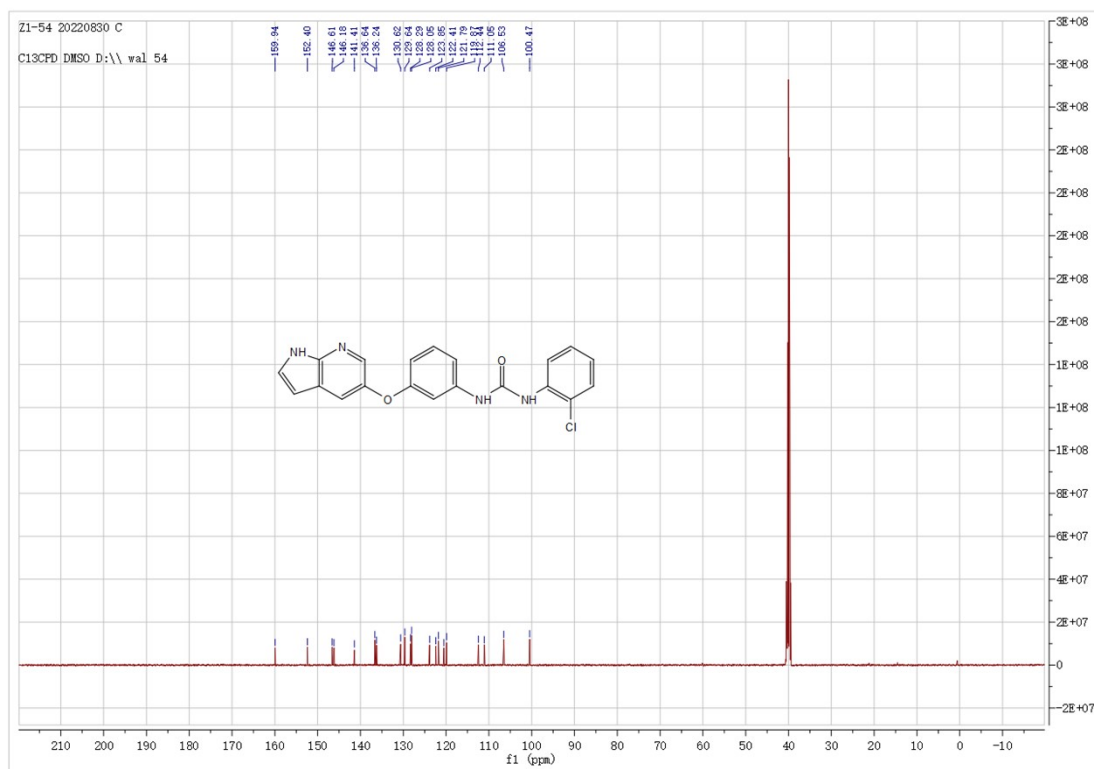

<sup>13</sup>C NMR spectrum of 2



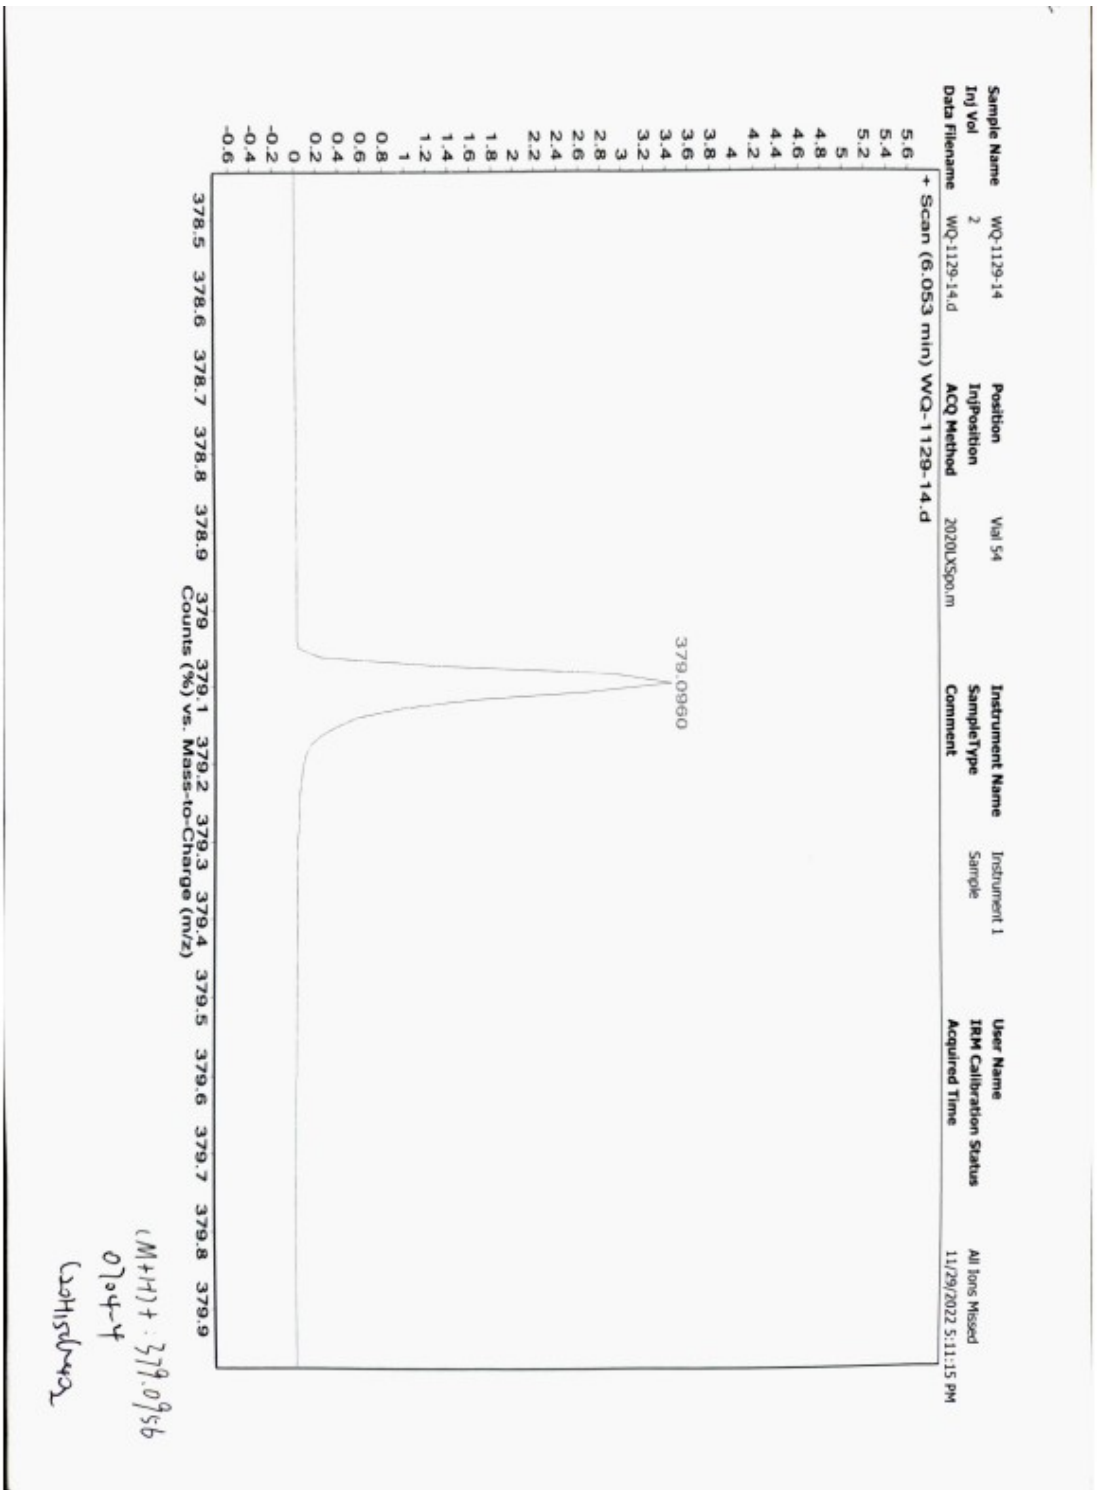

HRMS (ESI) spectrum of 2

1-(3-((1H-pyrrolo[2,3-b]pyridin-5-yl)oxy)phenyl)-3-(2-methylphenyl)urea (**3**)

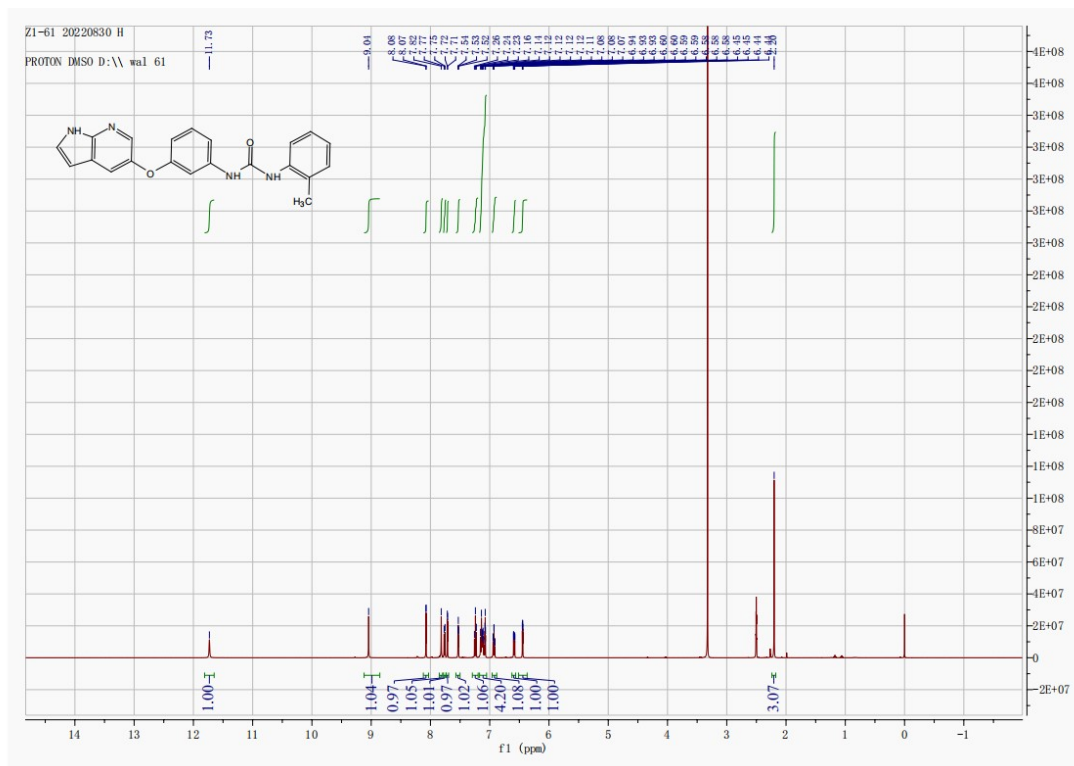

<sup>1</sup>H NMR spectrum of **3**

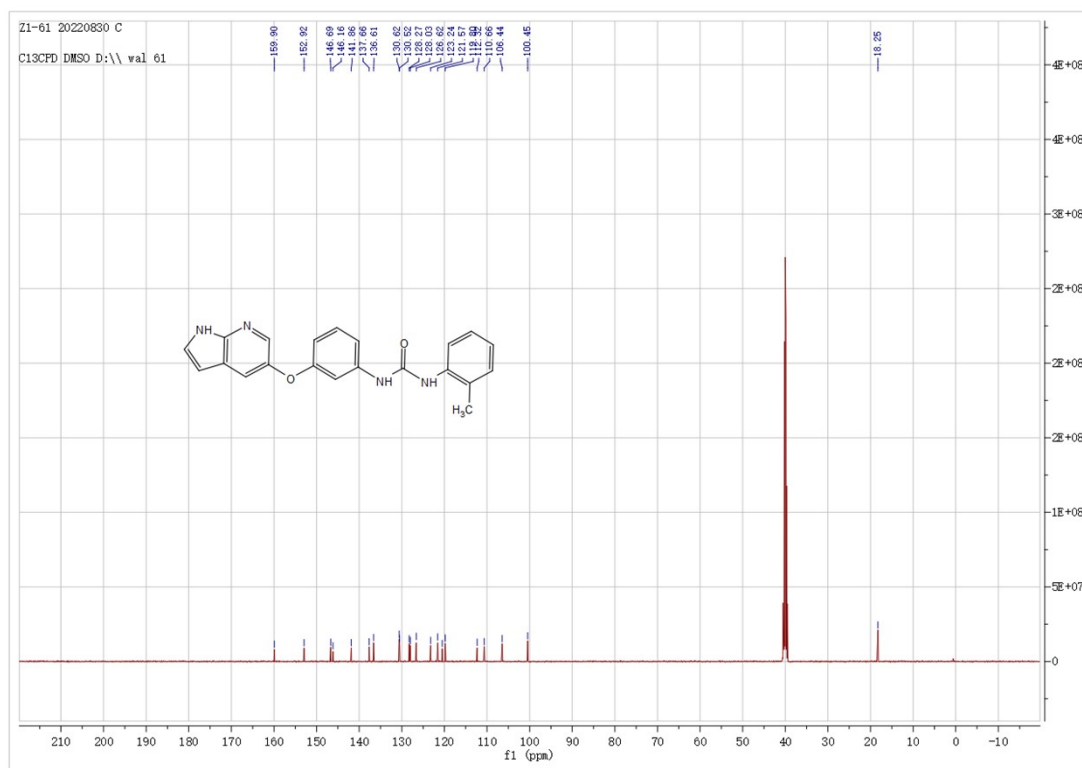

<sup>13</sup>C NMR spectrum of **3**

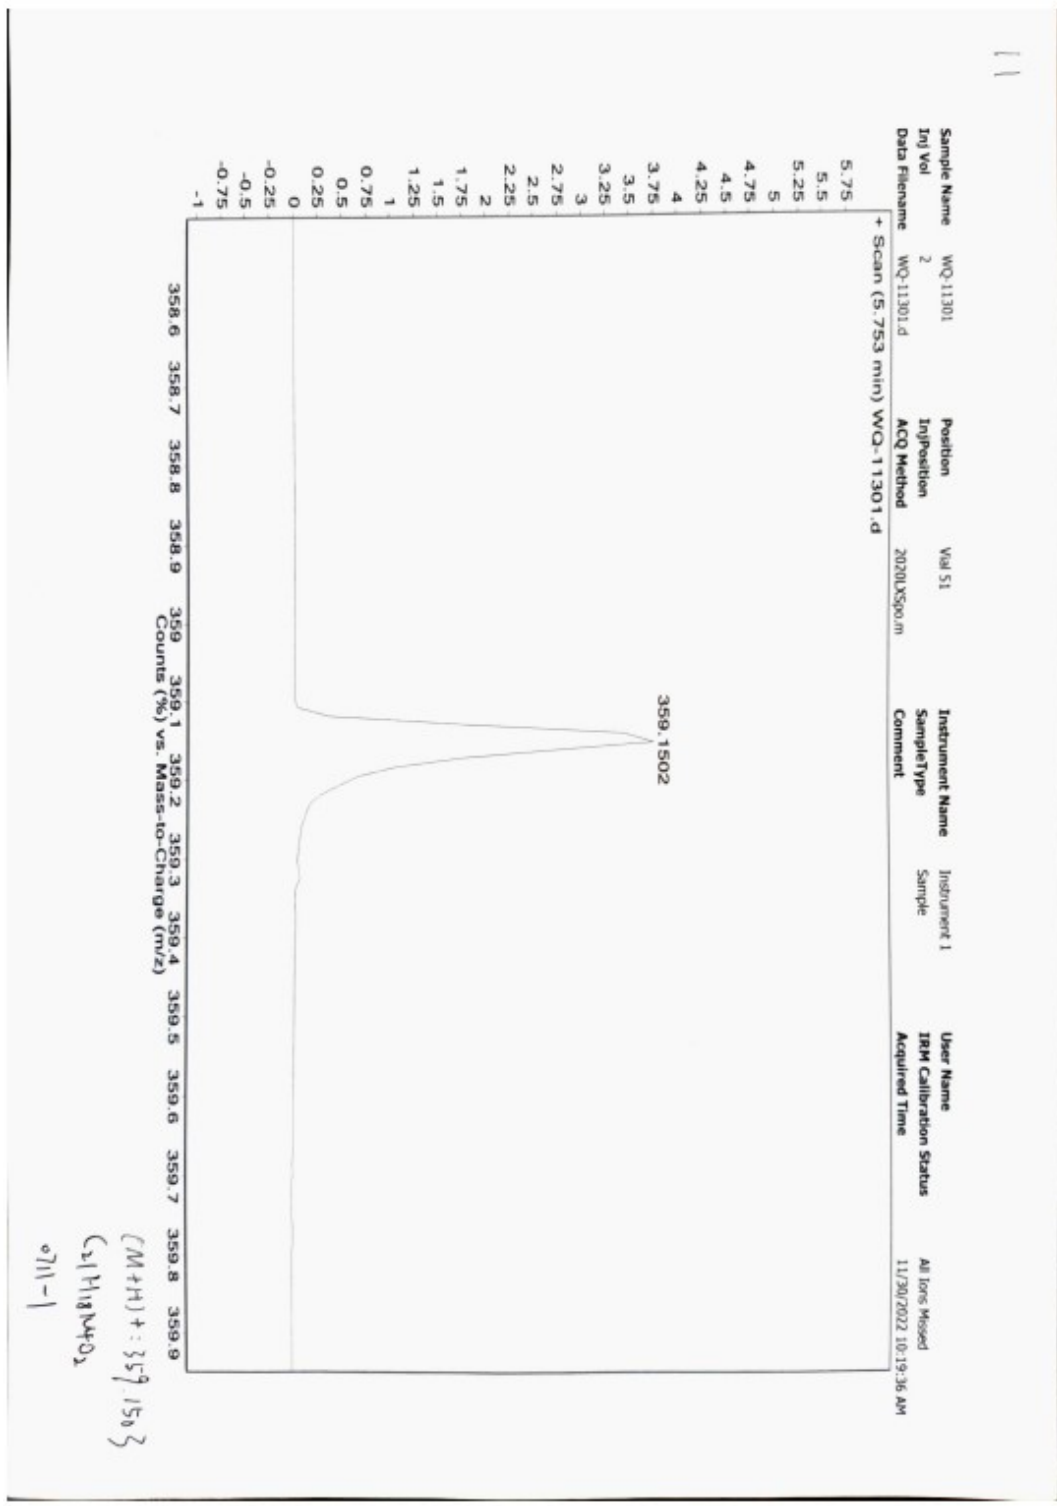

HRMS (ESI) spectrum of 3

1-(3-((1H-pyrrolo[2,3-b]pyridin-5-yl)oxy)phenyl)-3-(3-fluorophenyl)urea (4)

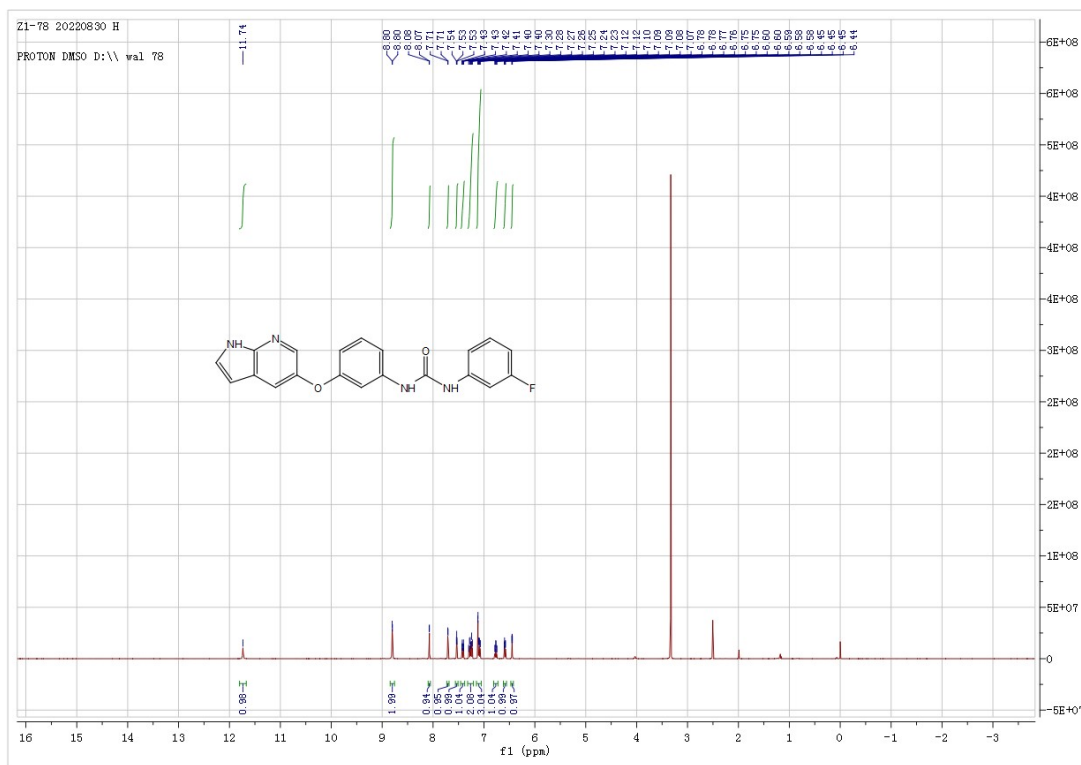

<sup>1</sup>H NMR spectrum of 4

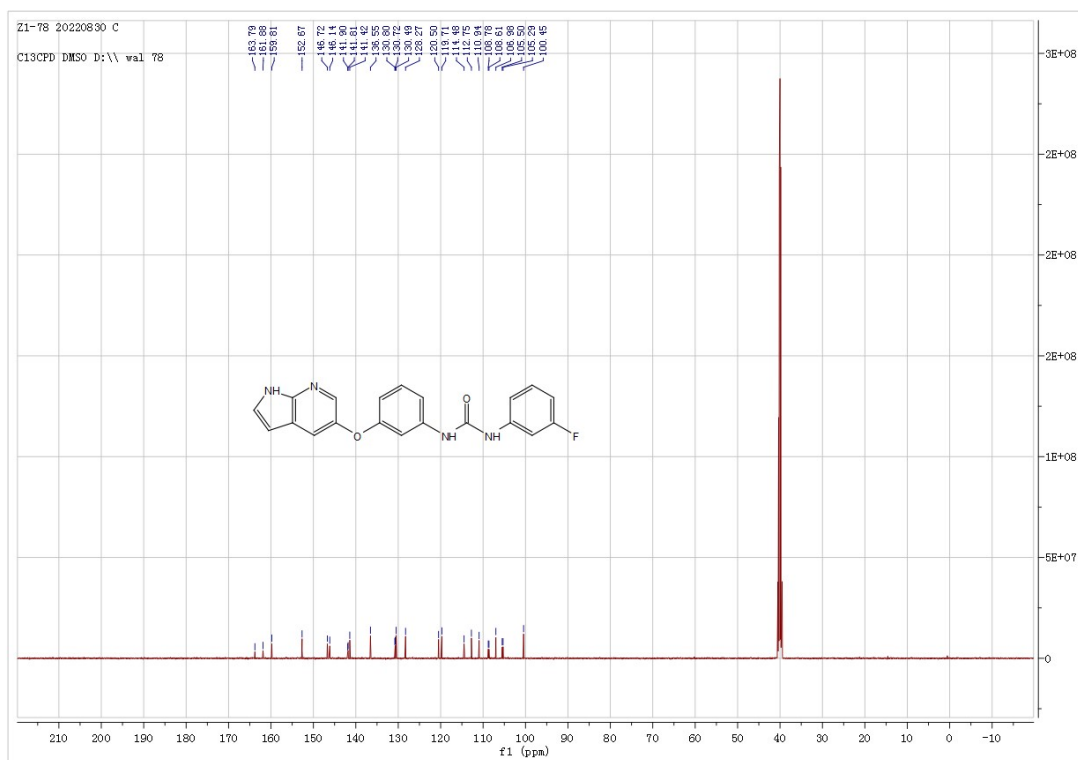

<sup>13</sup>C NMR spectrum of 4

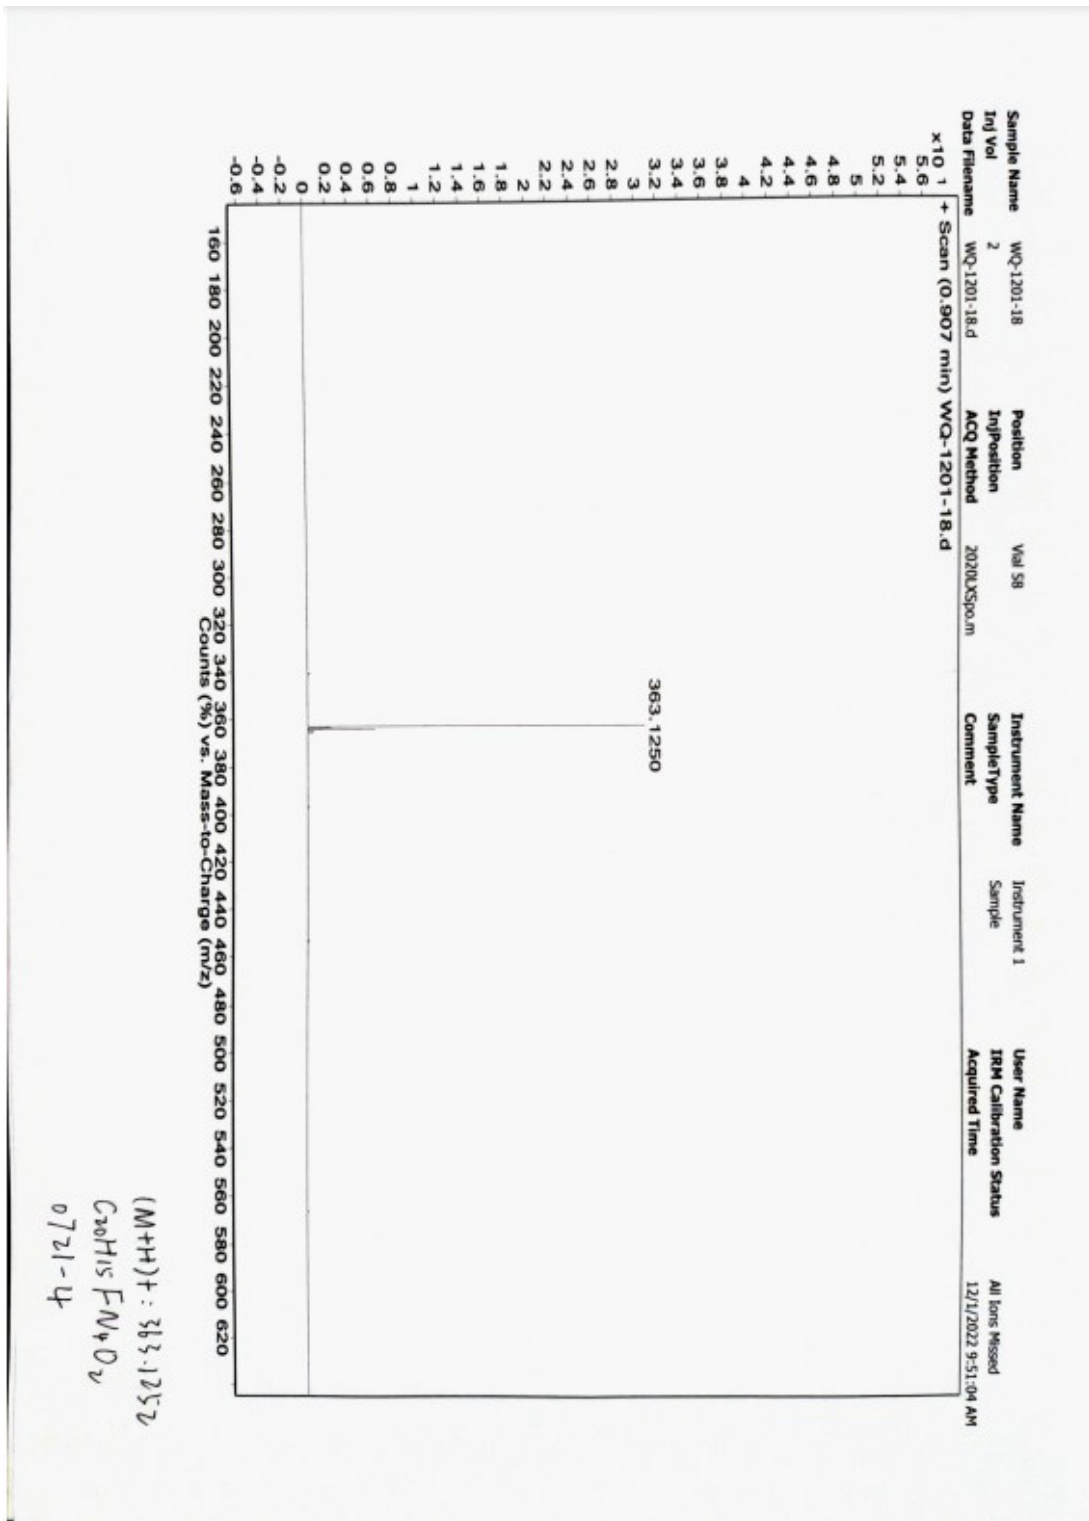

HRMS (ESI) spectrum of 4

1-(3-((1H-pyrrolo[2,3-b]pyridin-5-yl)oxy)phenyl)-3-(3-chlorophenyl)urea (5)

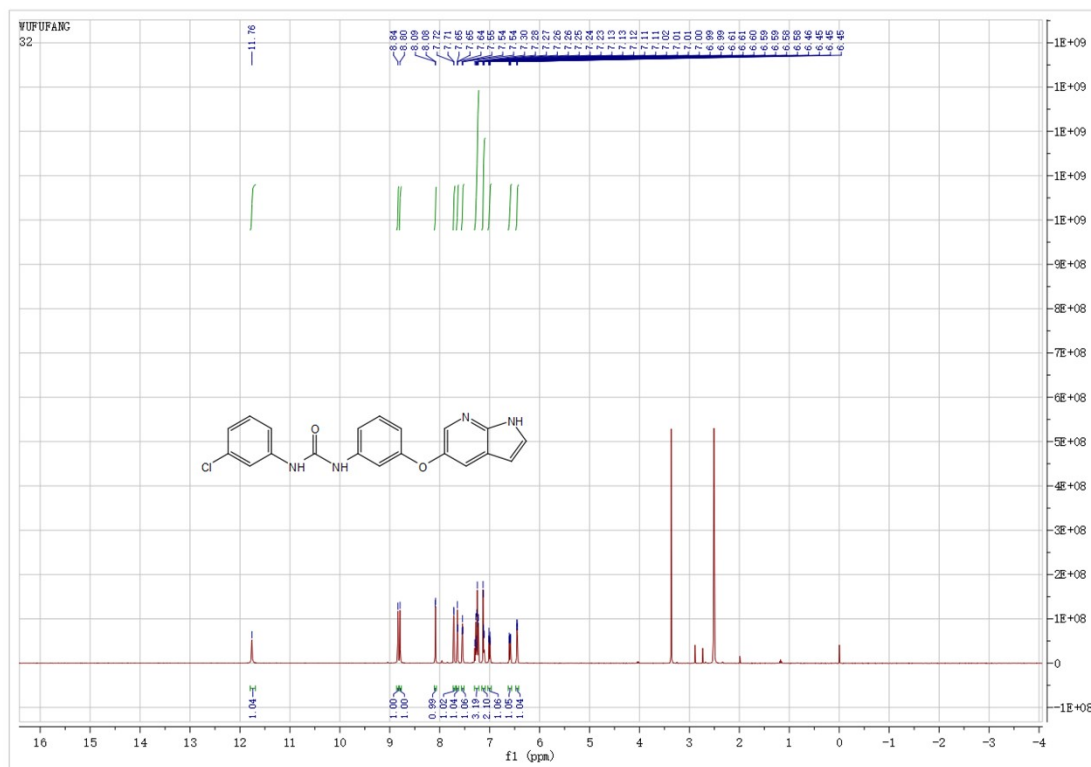

<sup>1</sup>H NMR spectrum of 5

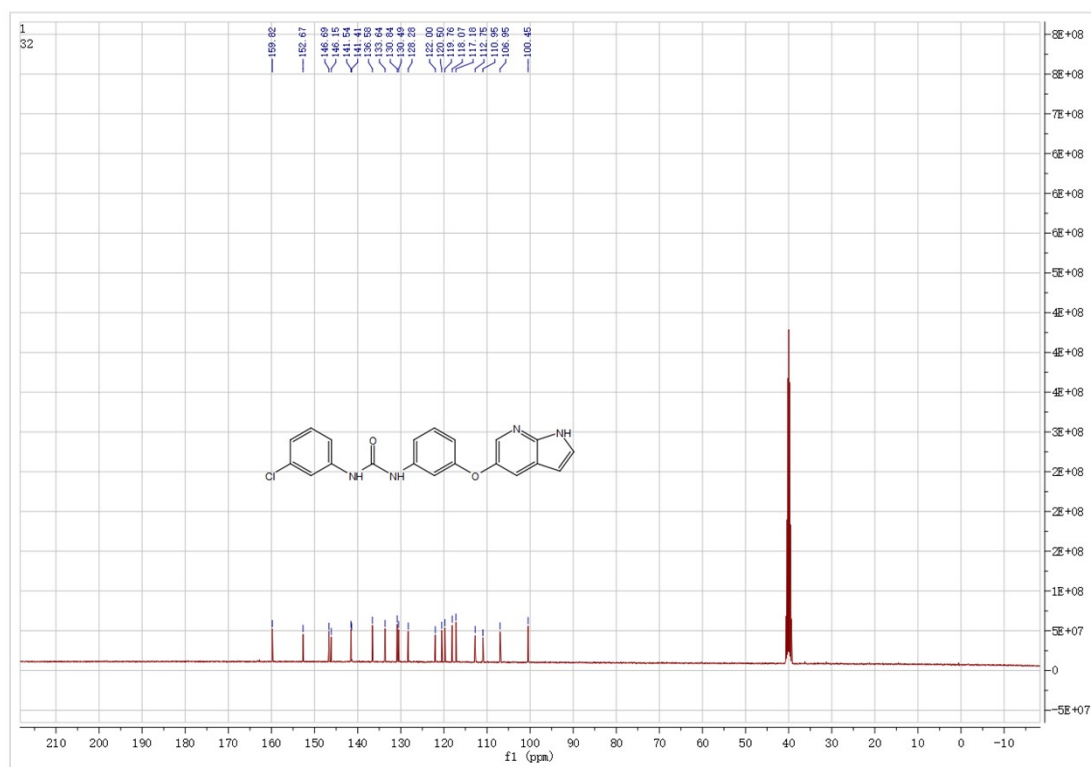

<sup>13</sup>C NMR spectrum of 5

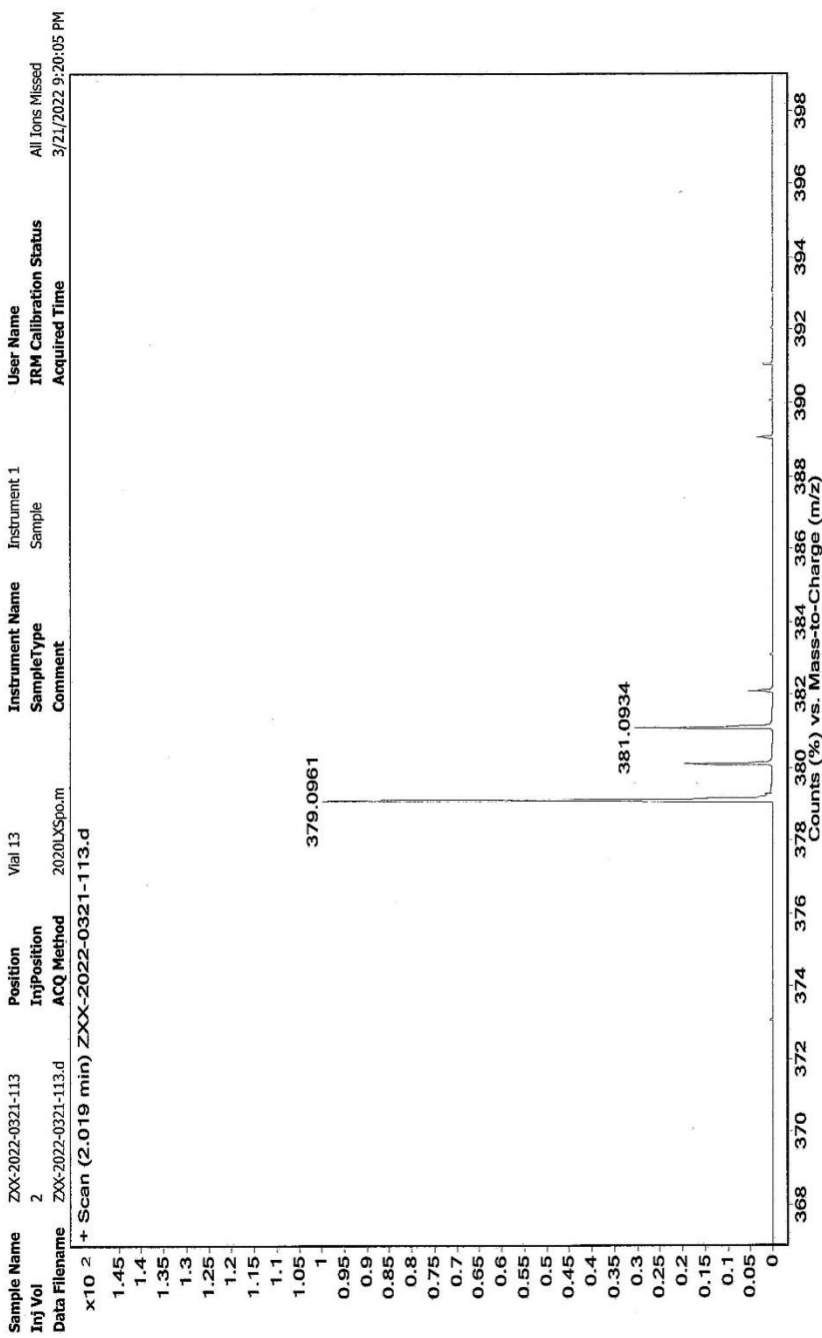

0321-1

HRMS (ESI) spectrum of 5

1-(3-((1H-pyrrolo[2,3-b]pyridin-5-yl)oxy)phenyl)-3-(3-methylphenyl)urea (**6**)

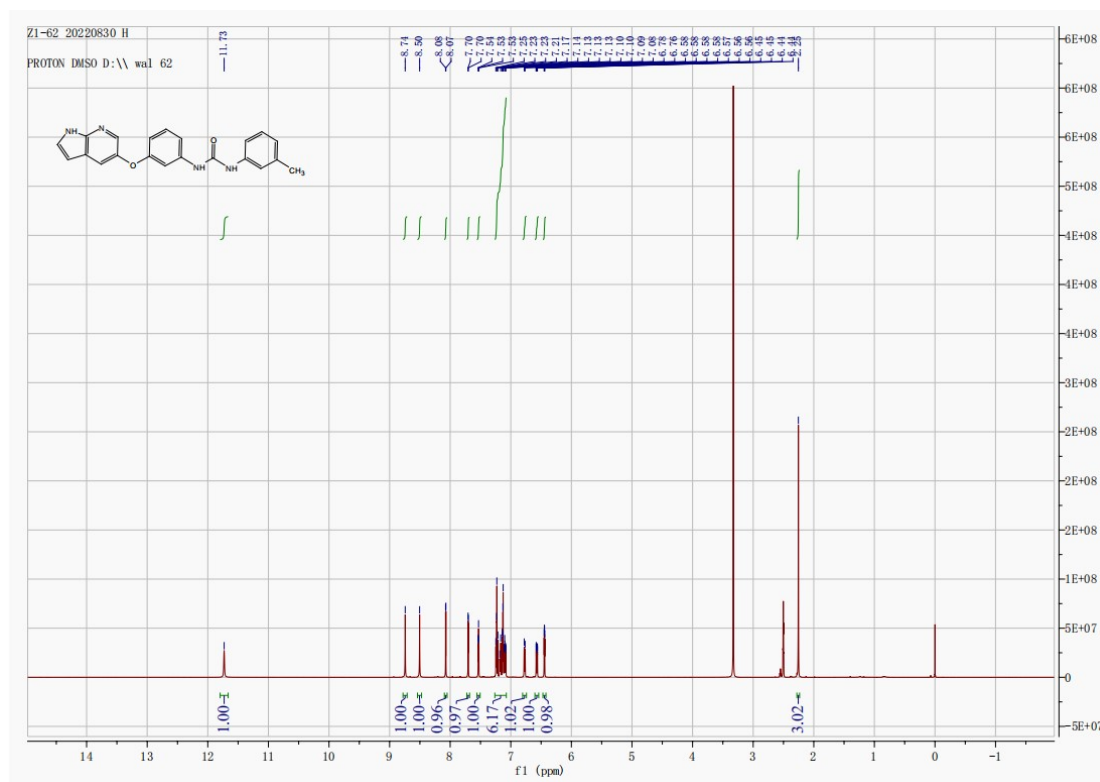

<sup>1</sup>H NMR spectrum of **6**

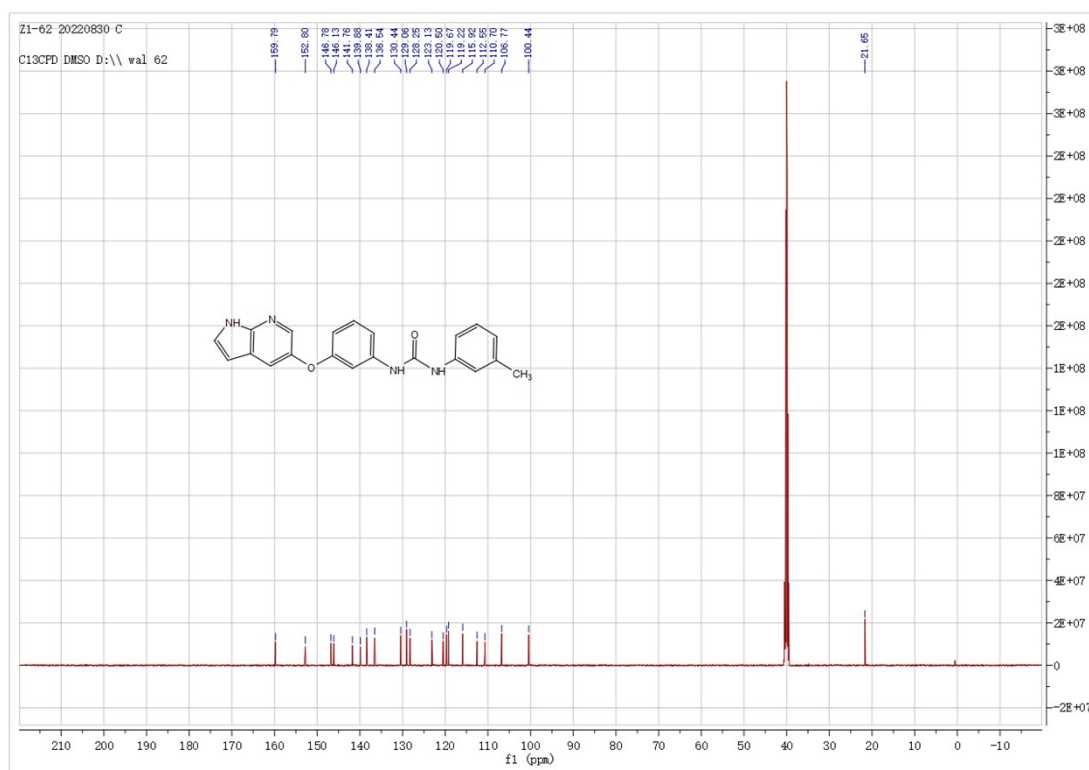

<sup>13</sup>C NMR spectrum of **6**



12

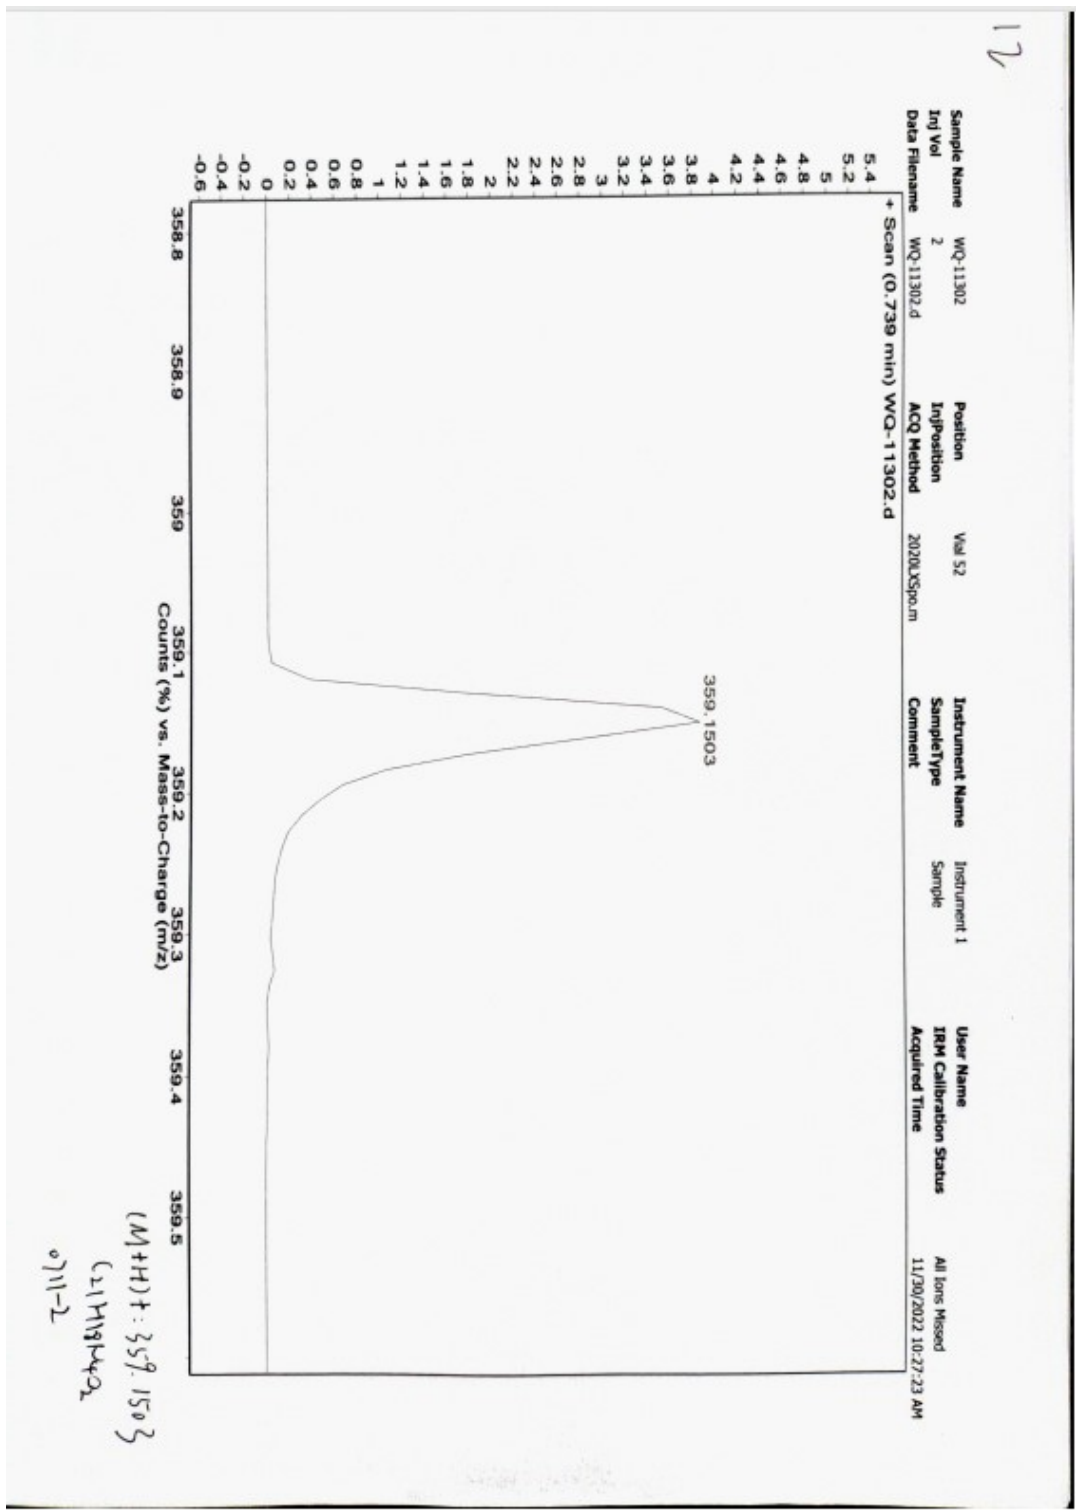

HRMS (ESI) spectrum of 6

1-(3-((1H-pyrrolo[2,3-b]pyridin-5-yl)oxy)phenyl)-3-(3-(trifluoromethyl)phenyl)urea

(7)

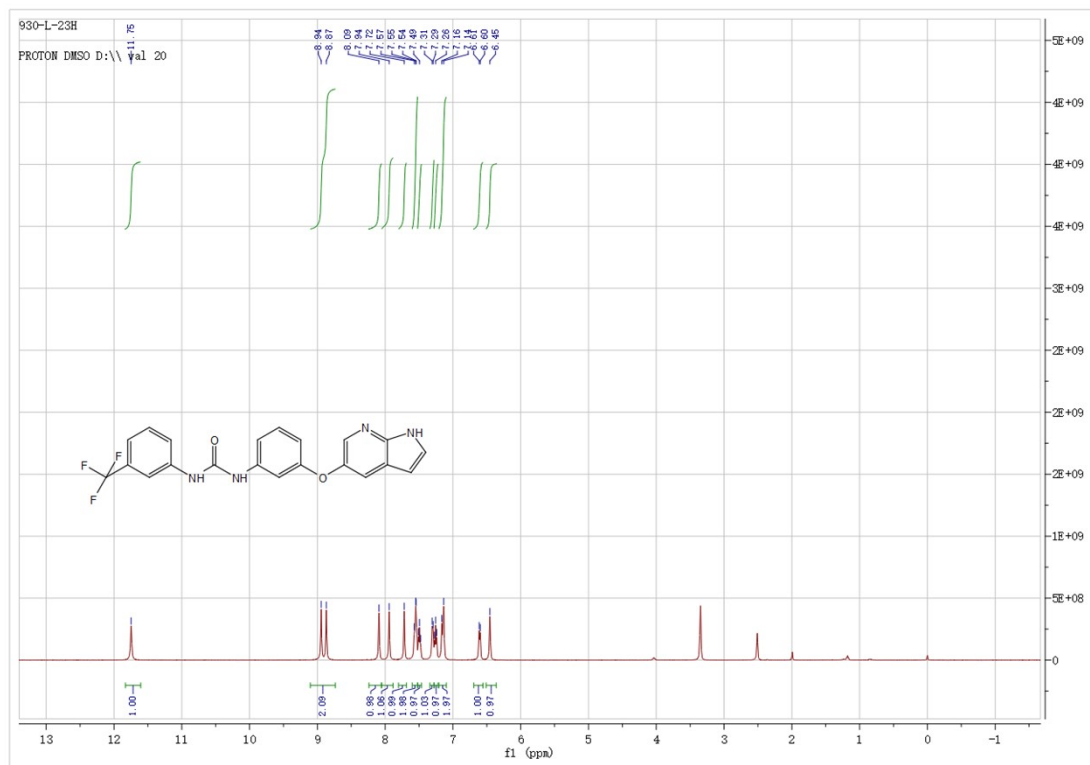

<sup>1</sup>H NMR spectrum of 7

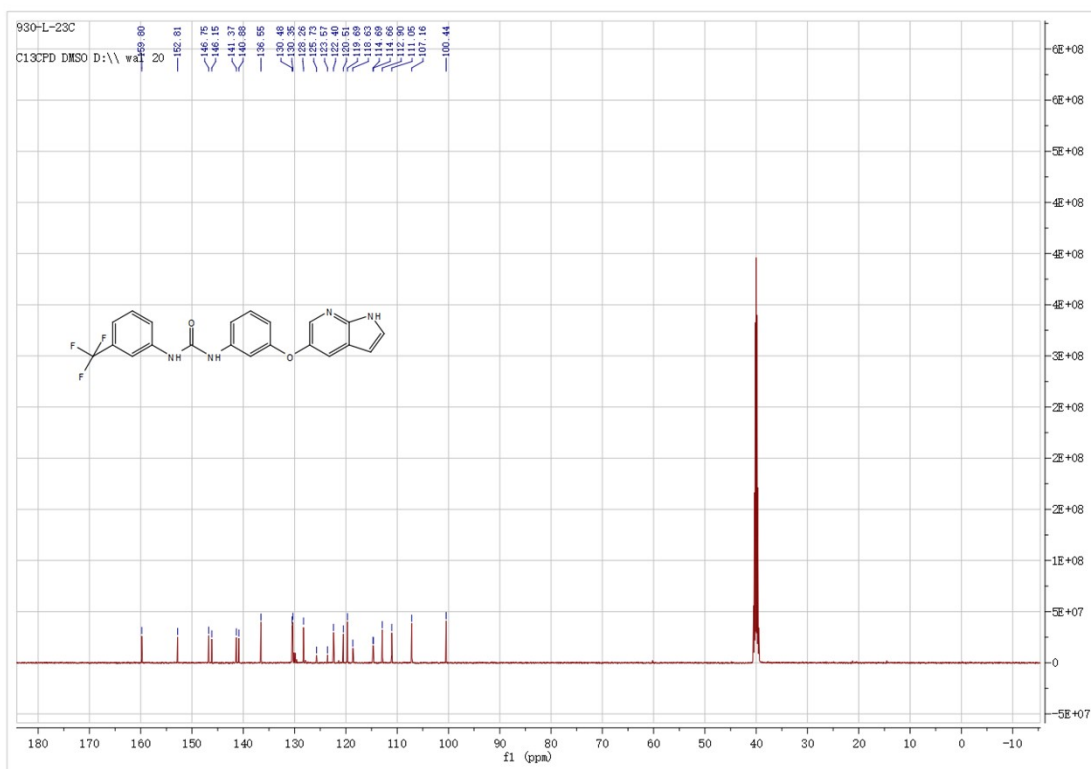

<sup>13</sup>C NMR spectrum of 7

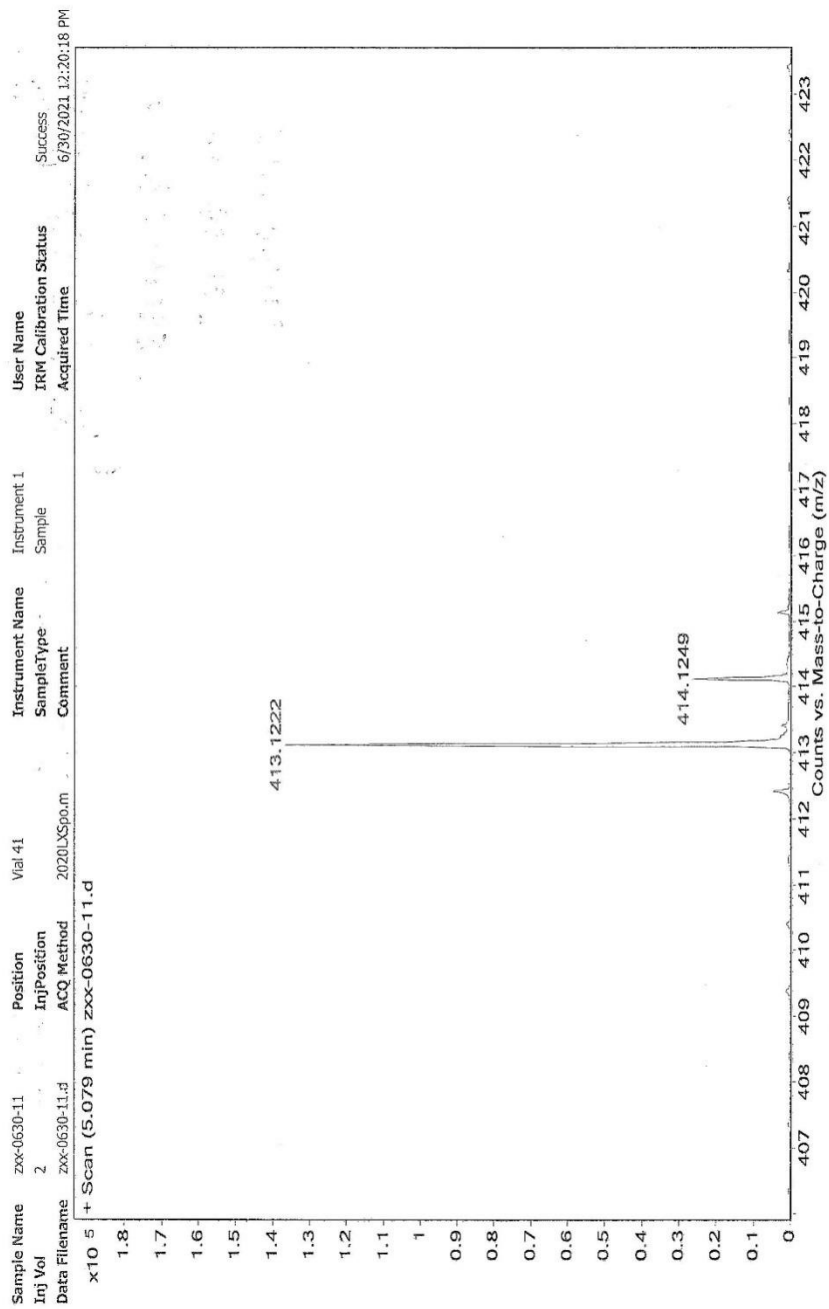

06/30/21

HRMS (ESI) spectrum of 7

1-(3-((1H-pyrrolo[2,3-b]pyridin-5-yl)oxy)phenyl)-3-(3-cyanophenyl)urea (**8**)

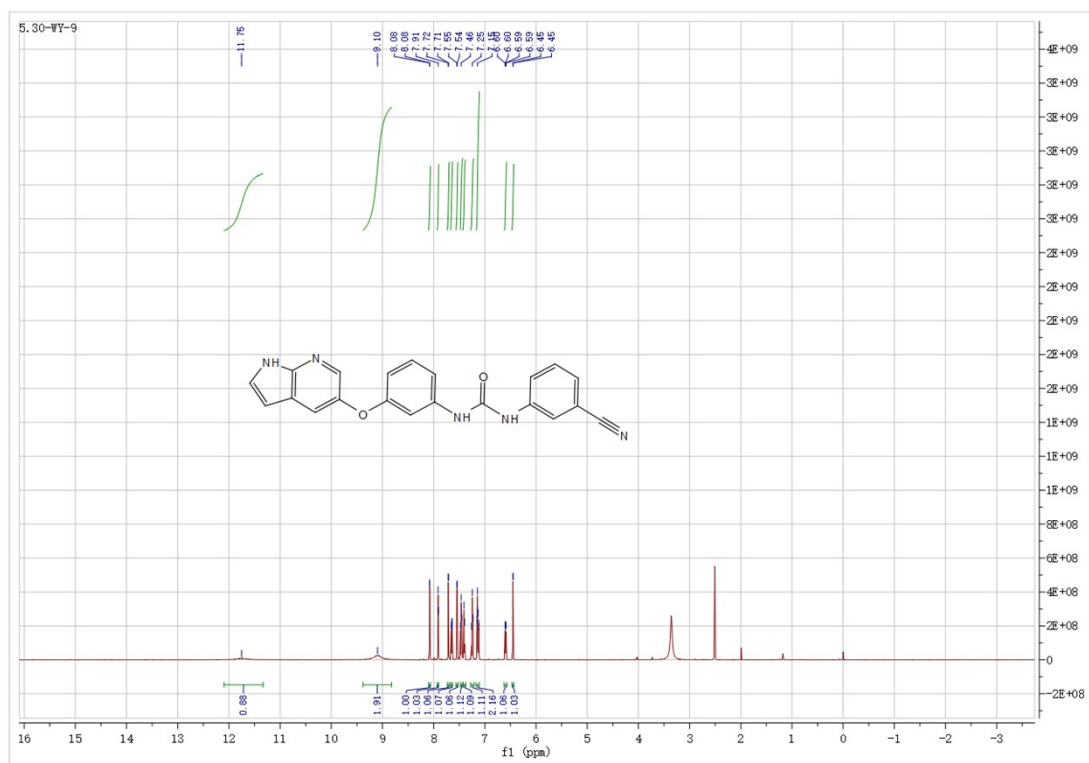

<sup>1</sup>H NMR spectrum of **8**

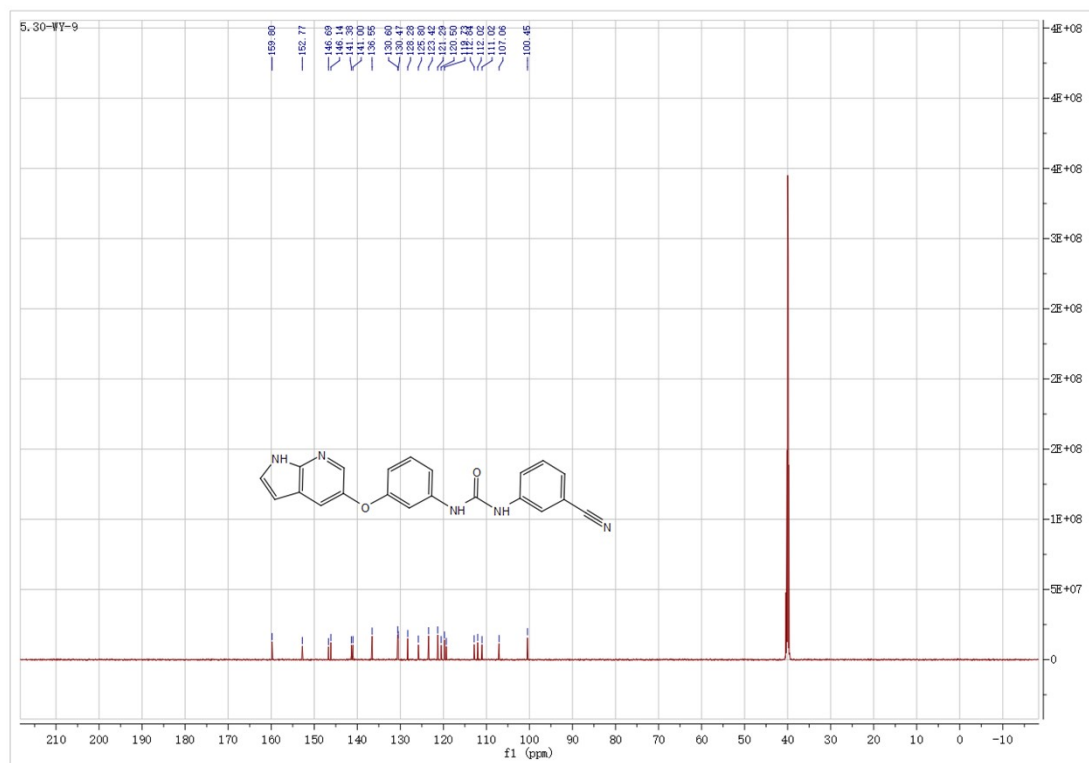

<sup>13</sup>C NMR spectrum of **8**

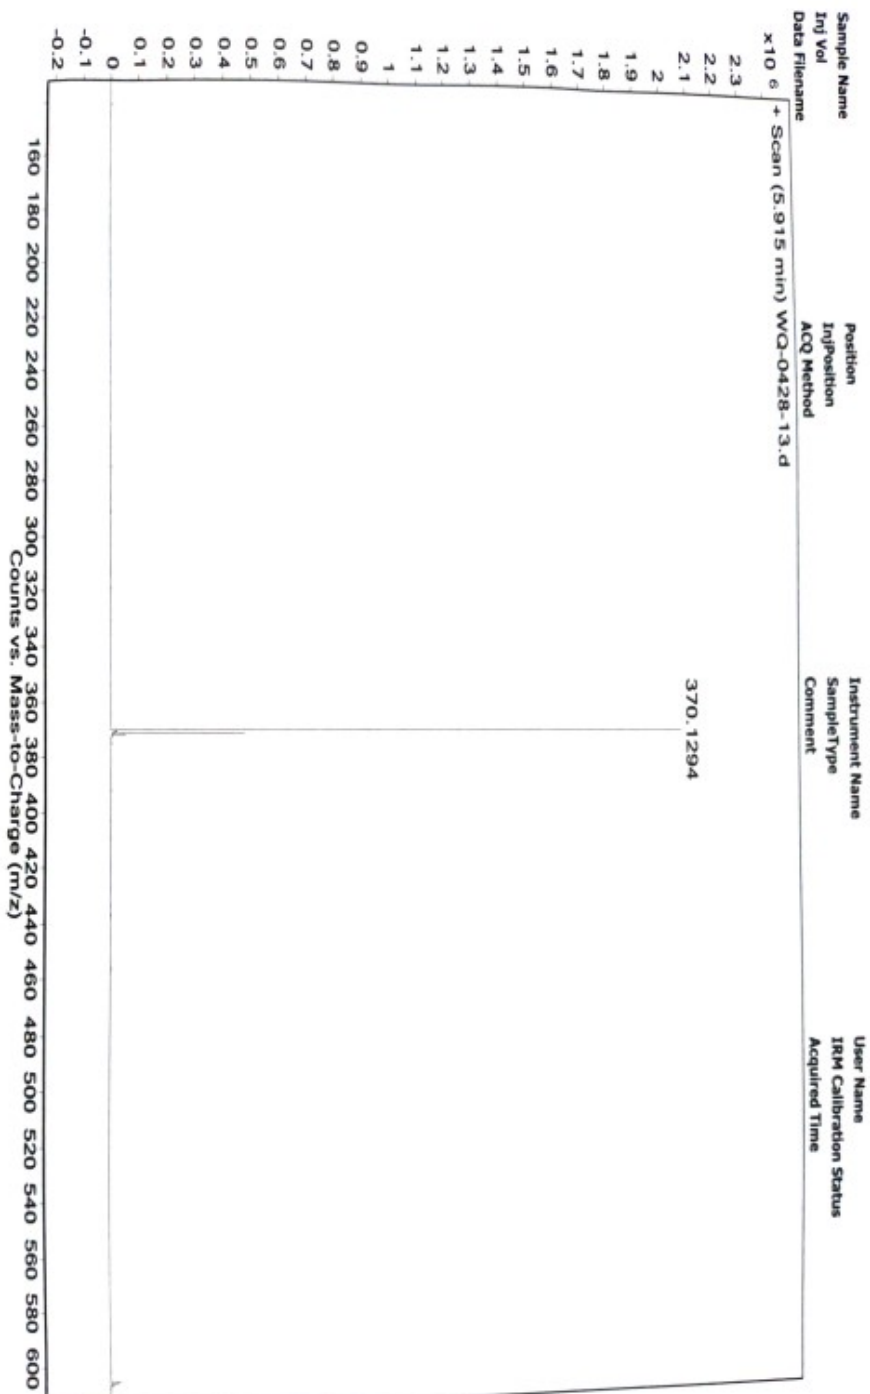

0316-3  
 370.1294  
 370.1294

HRMS (ESI) spectrum of 8

1-(3-((1H-pyrrolo[2,3-b]pyridin-5-yl)oxy)phenyl)-3-(3-methoxyphenyl)urea (9)

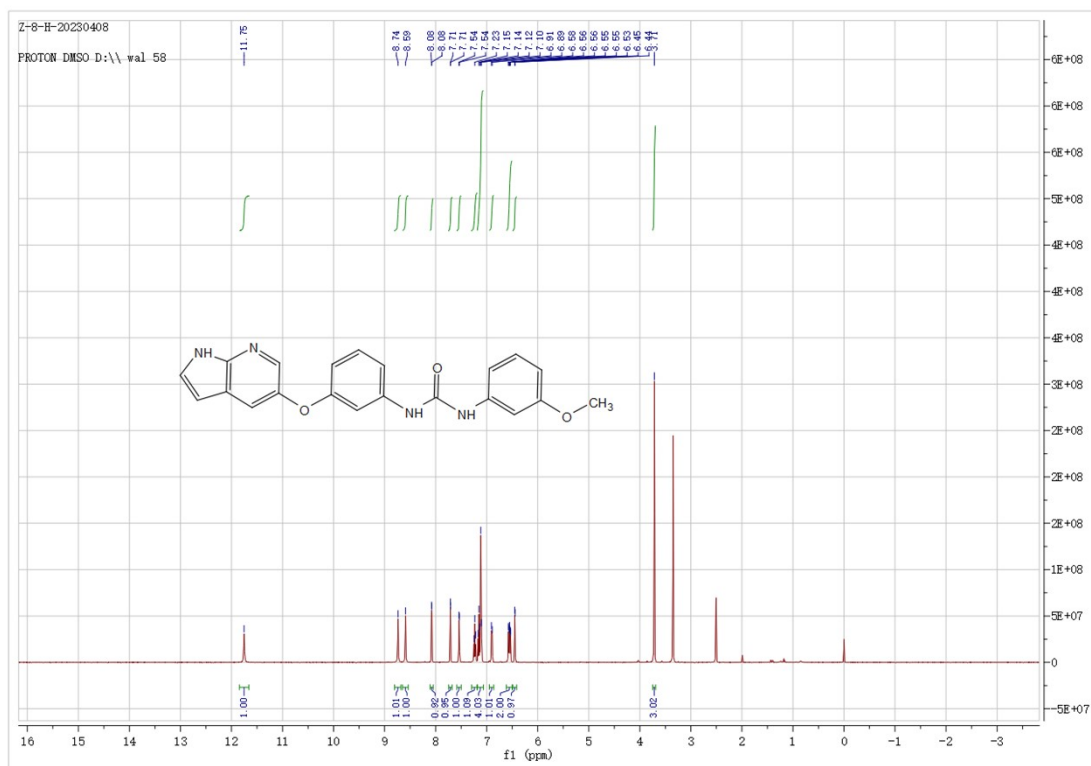

$^1\text{H}$  NMR spectrum of 9

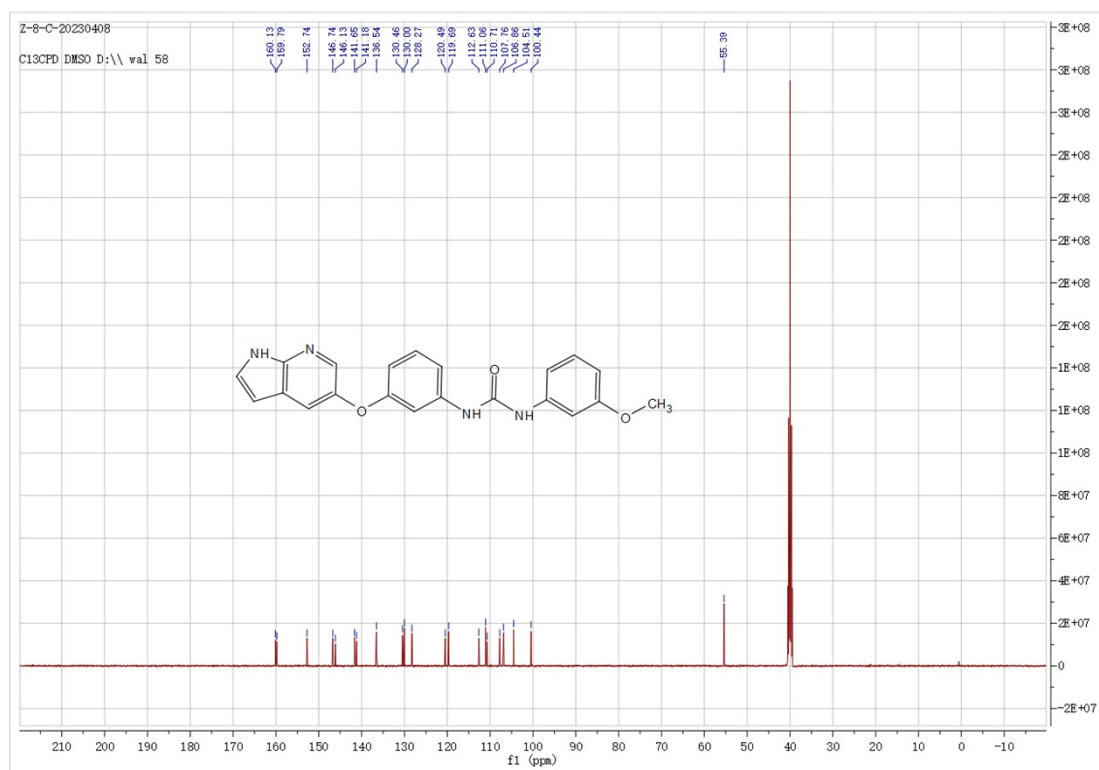

$^{13}\text{C}$  NMR spectrum of 9

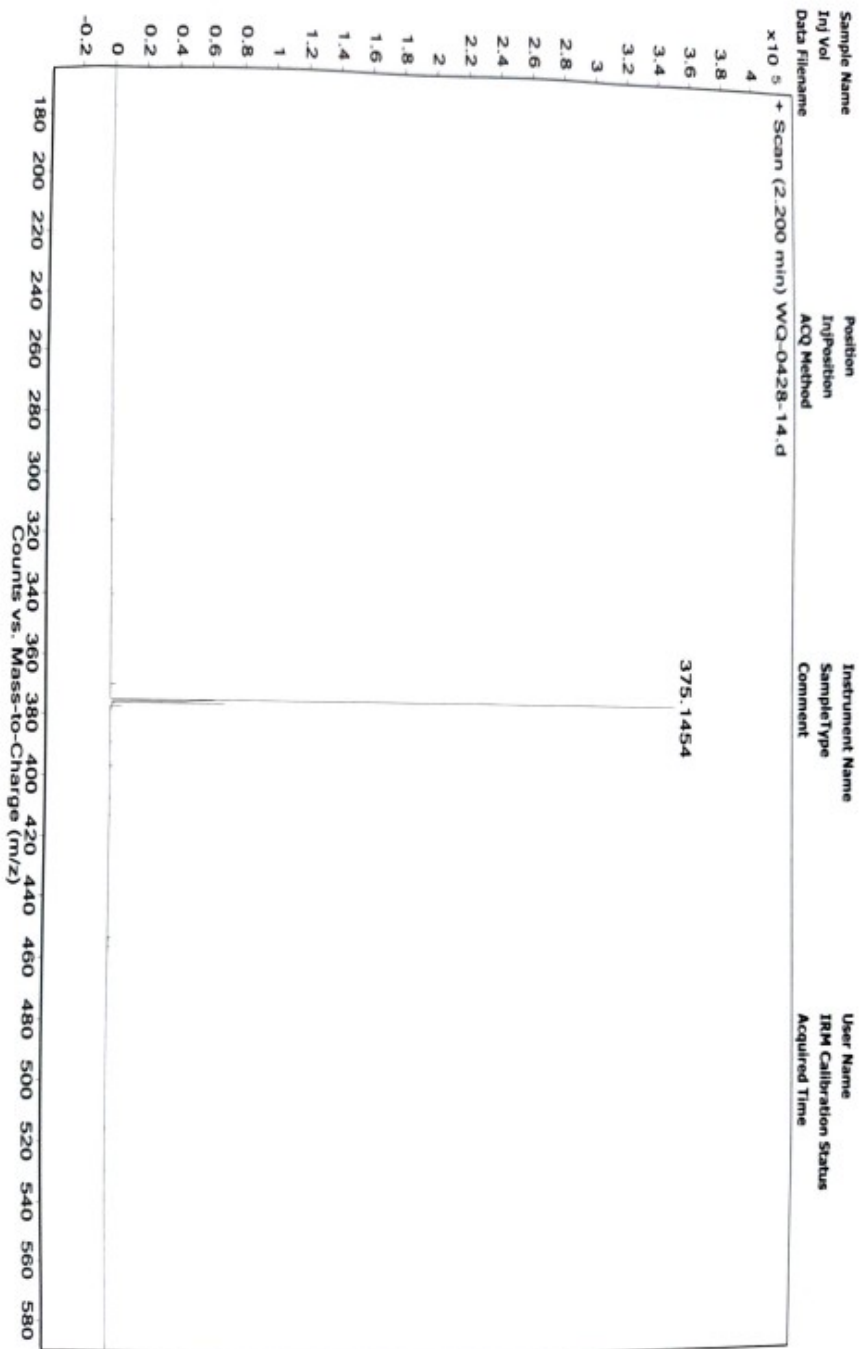

316-4  
 Inj: Cell11803V4  
 MS# : 375.1452

HRMS (ESI) spectrum of 9

1-(3-((1H-pyrrolo[2,3-b]pyridin-5-yl)oxy)phenyl)-3-(4-fluorophenyl)urea

(10)

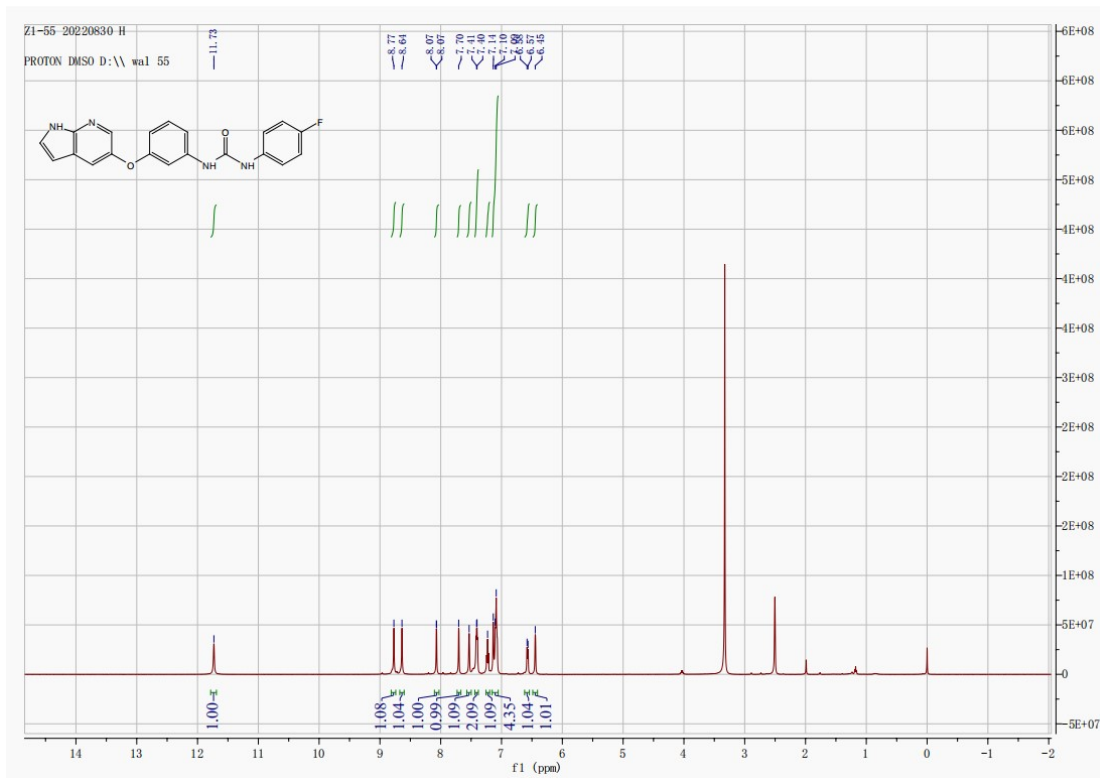

<sup>1</sup>H NMR spectrum of **10**

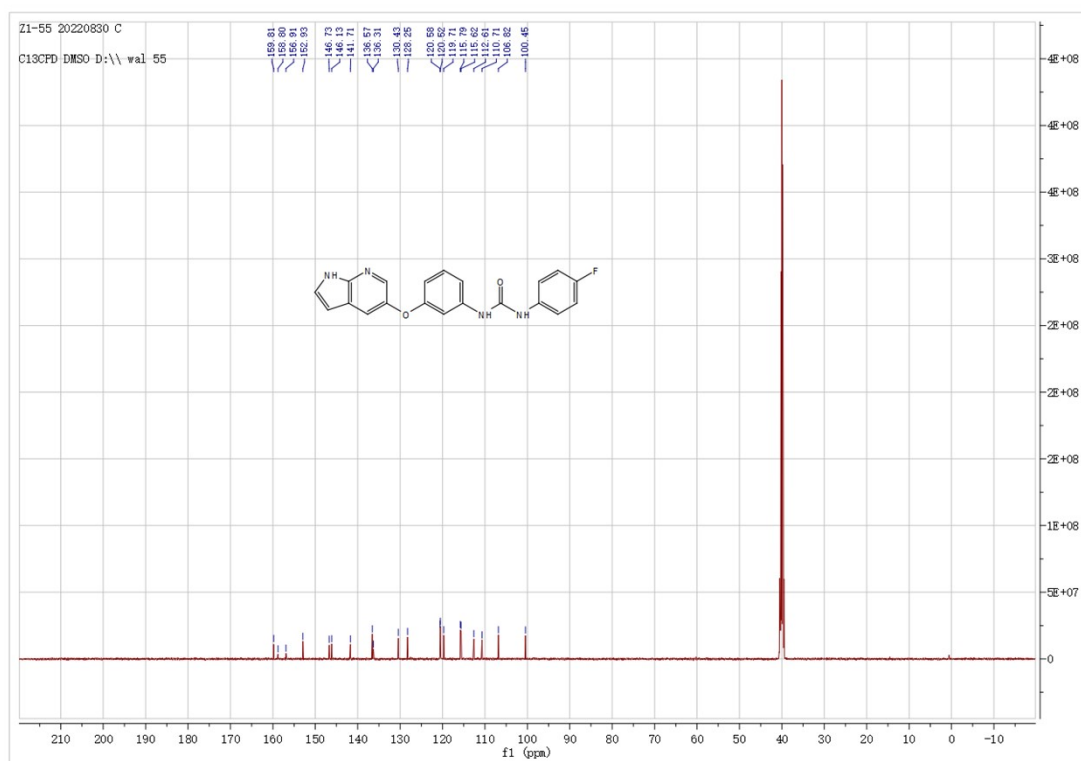

<sup>13</sup>C NMR spectrum of **10**



5

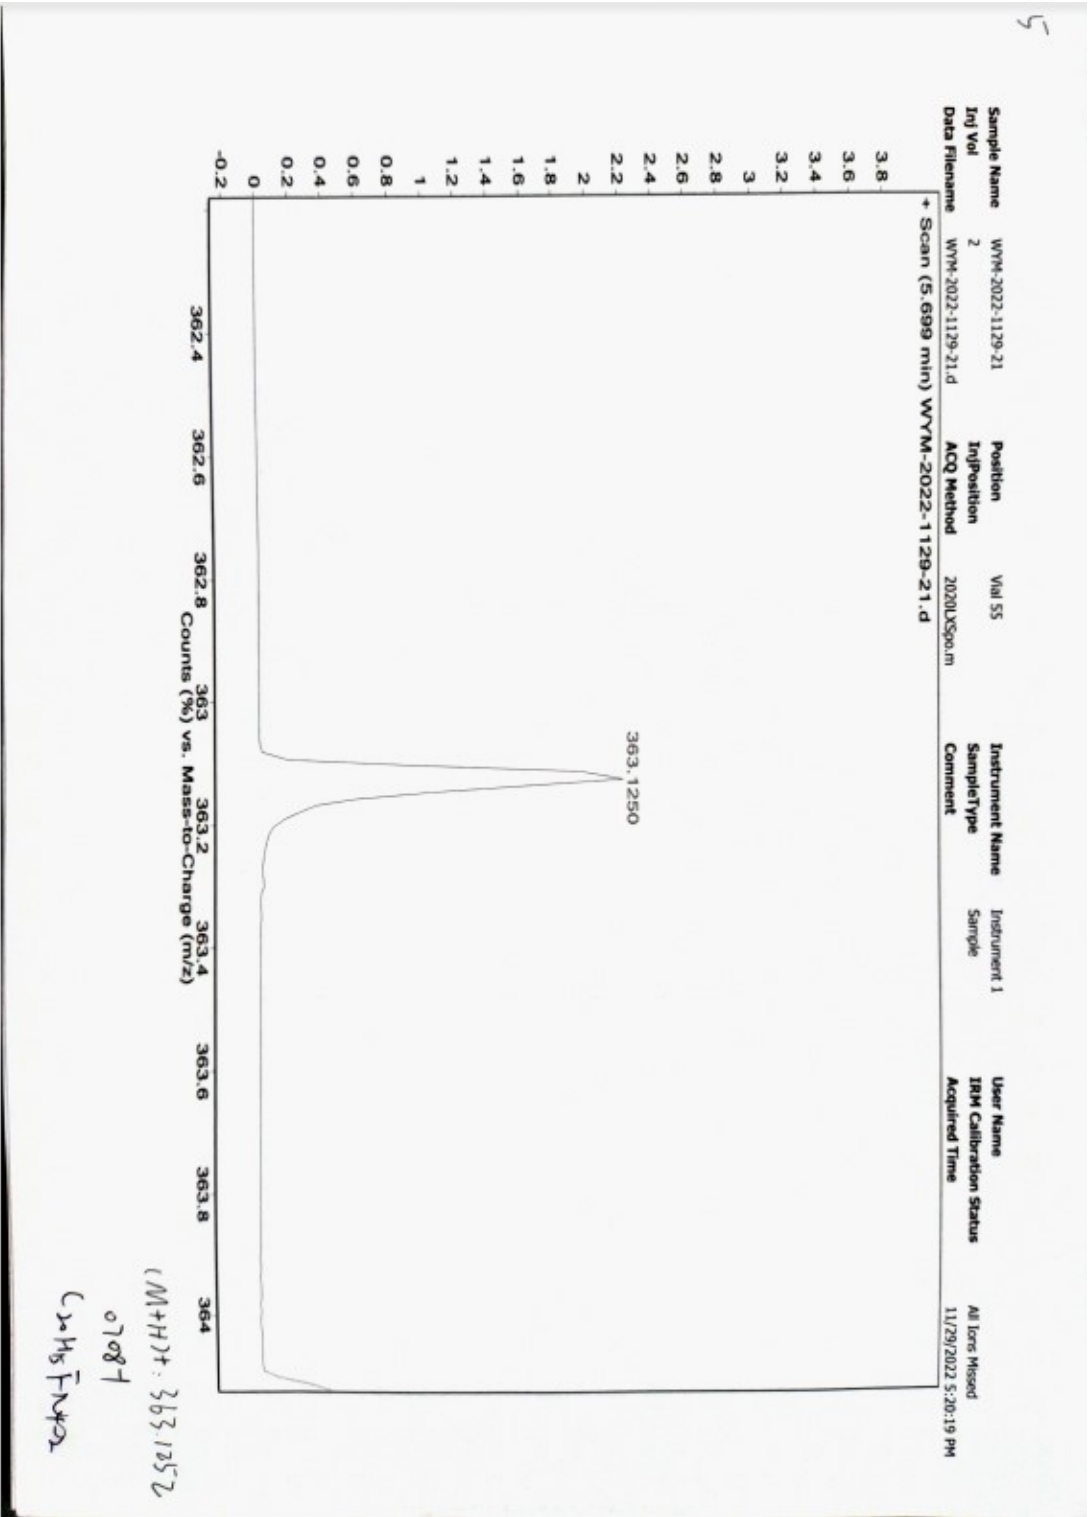

HRMS (ESI) spectrum of 10

1-(3-((1H-pyrrolo[2,3-b]pyridin-5-yl)oxy)phenyl)-3-(4-chlorophenyl)urea (**11**)

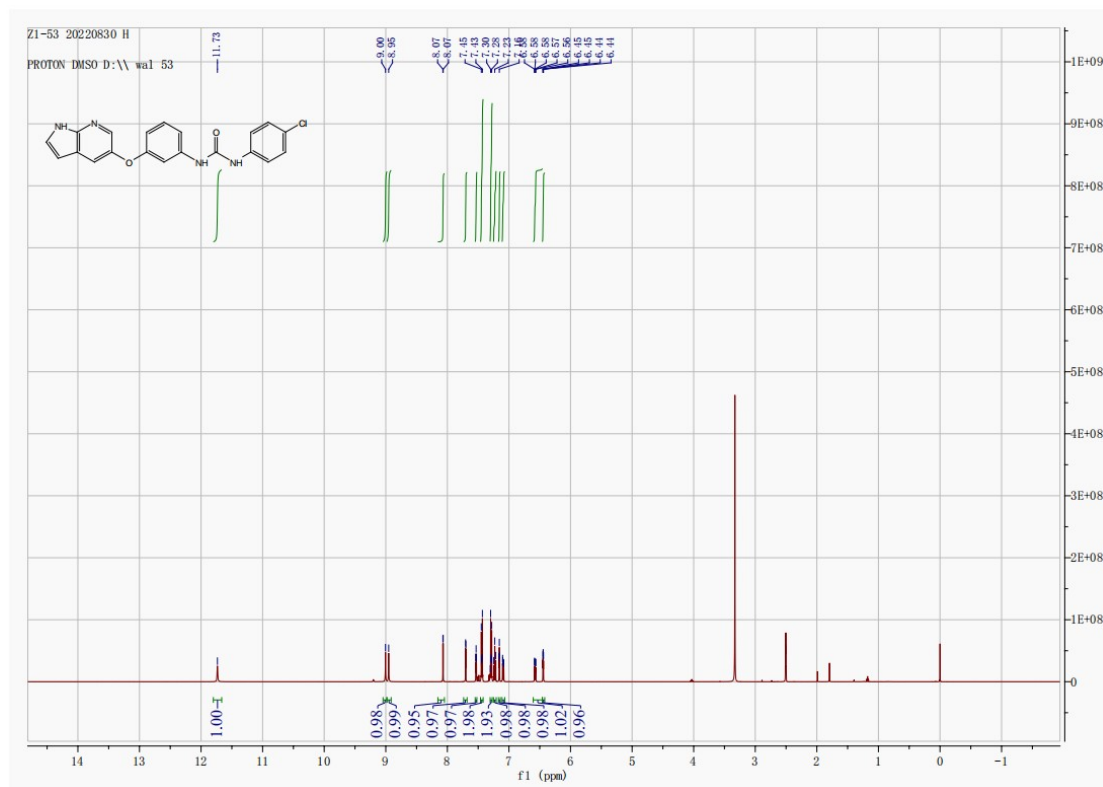

<sup>1</sup>H NMR spectrum of **11**

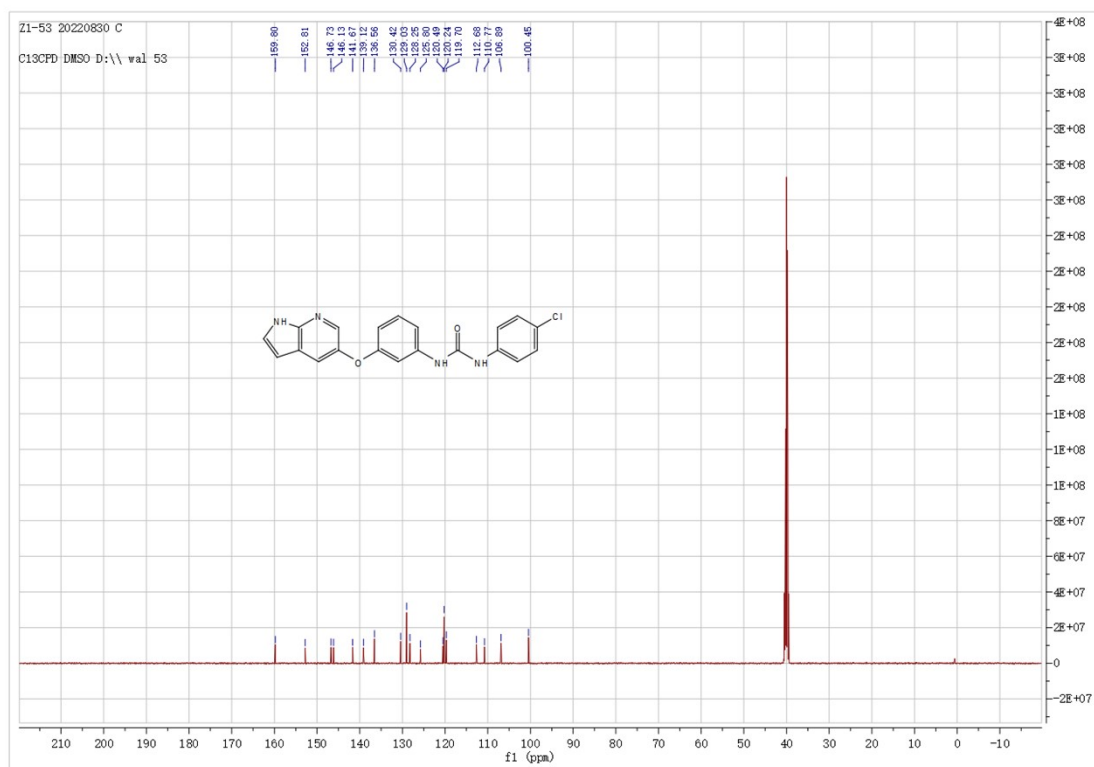

<sup>13</sup>C NMR spectrum of **11**

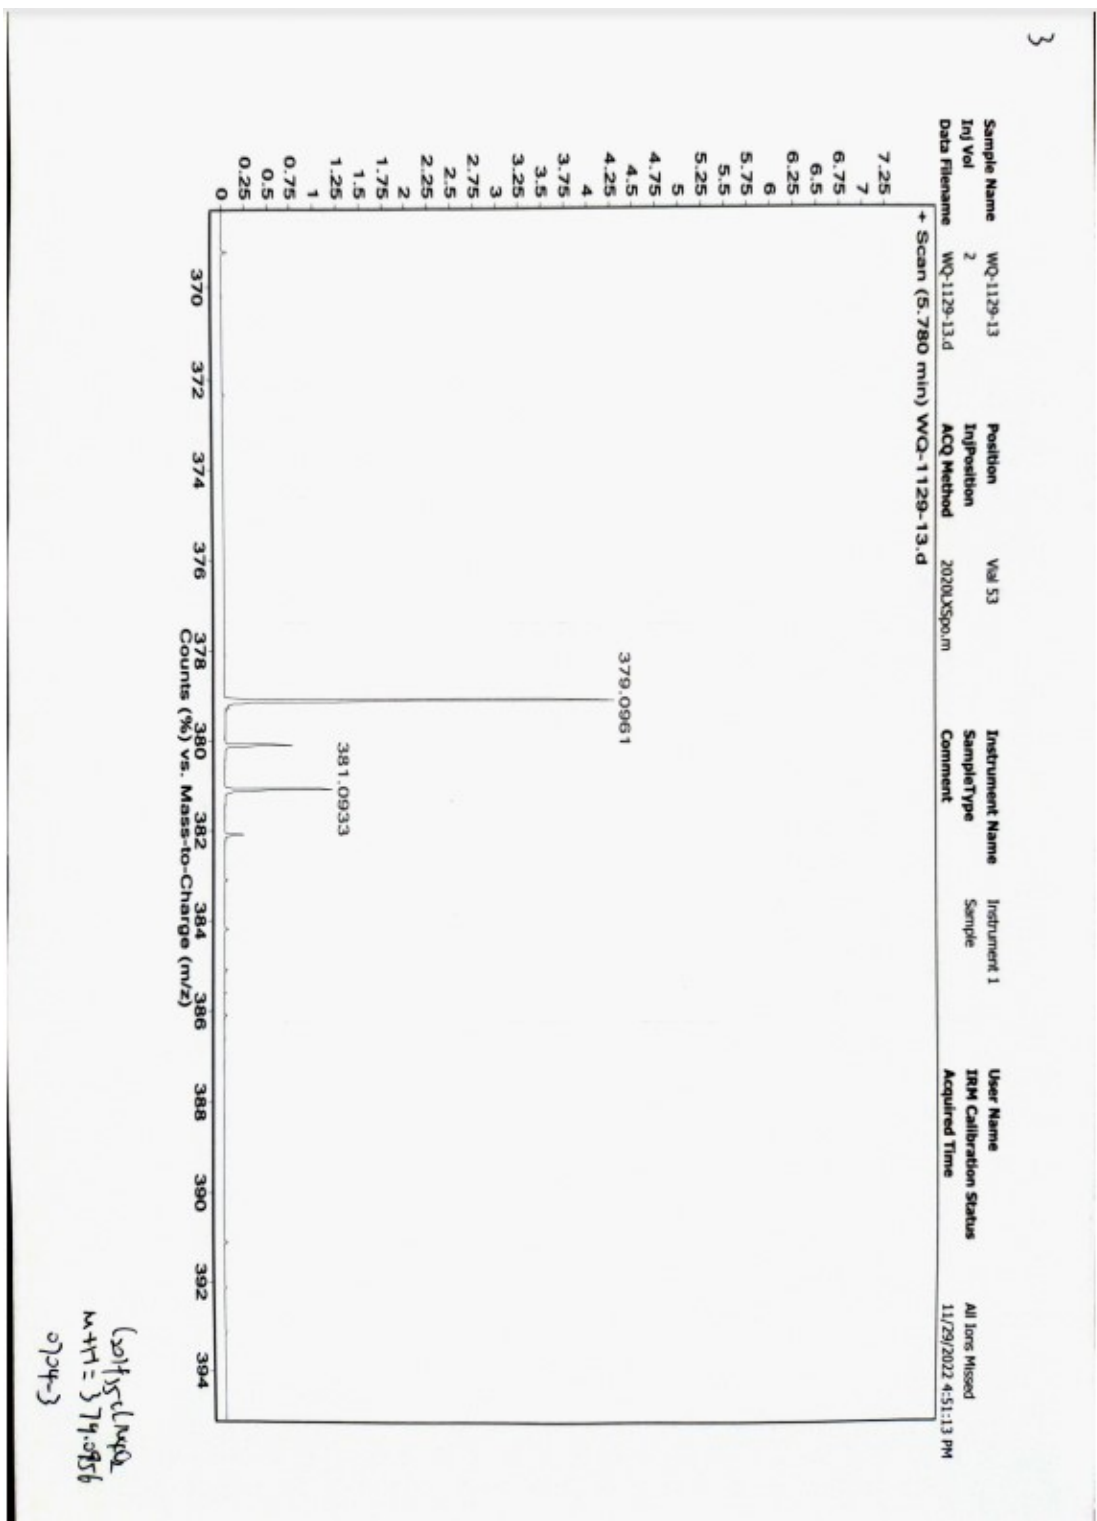

HRMS (ESI) spectrum of 11

1-(3-((1H-pyrrolo[2,3-b]pyridin-5-yl)oxy)phenyl)-3-(4-methylphenyl)urea (**12**)

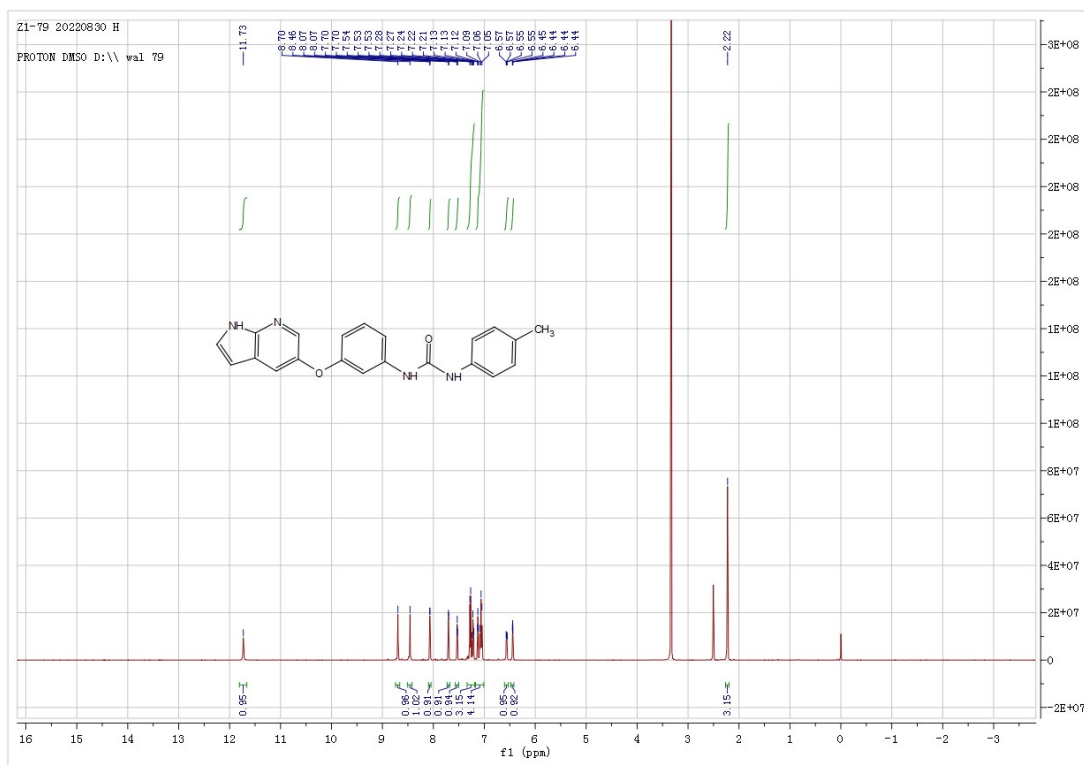

<sup>1</sup>H NMR spectrum of **12**

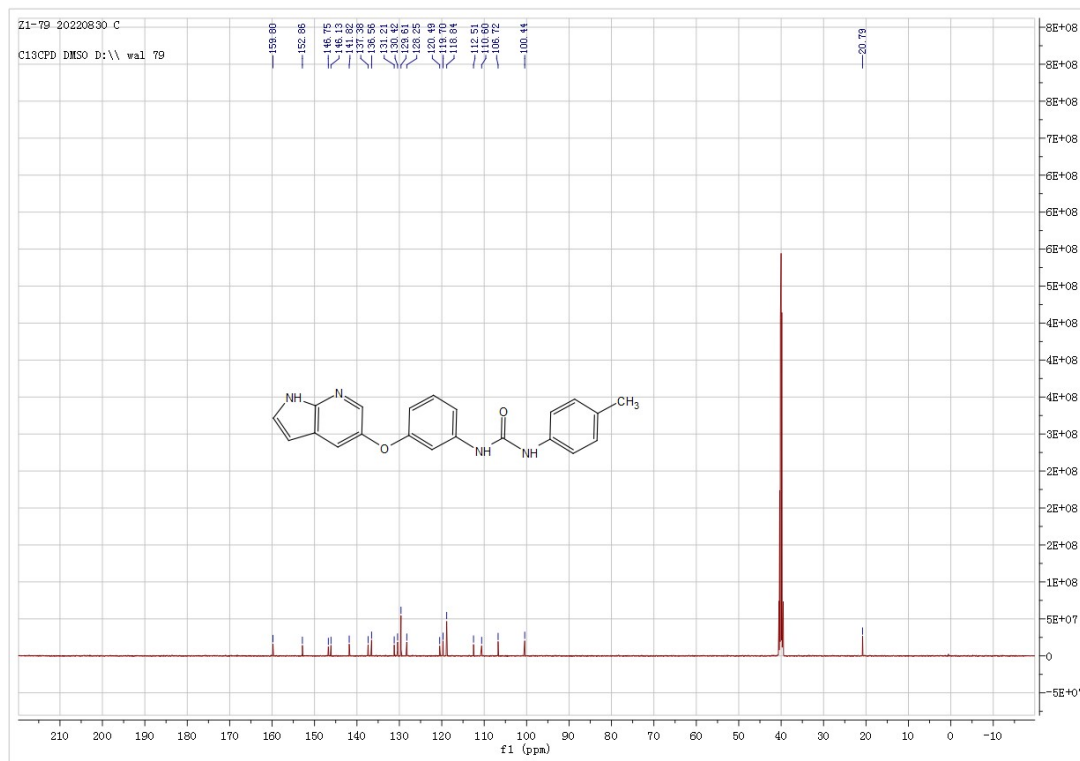

<sup>13</sup>C NMR spectrum of **12**

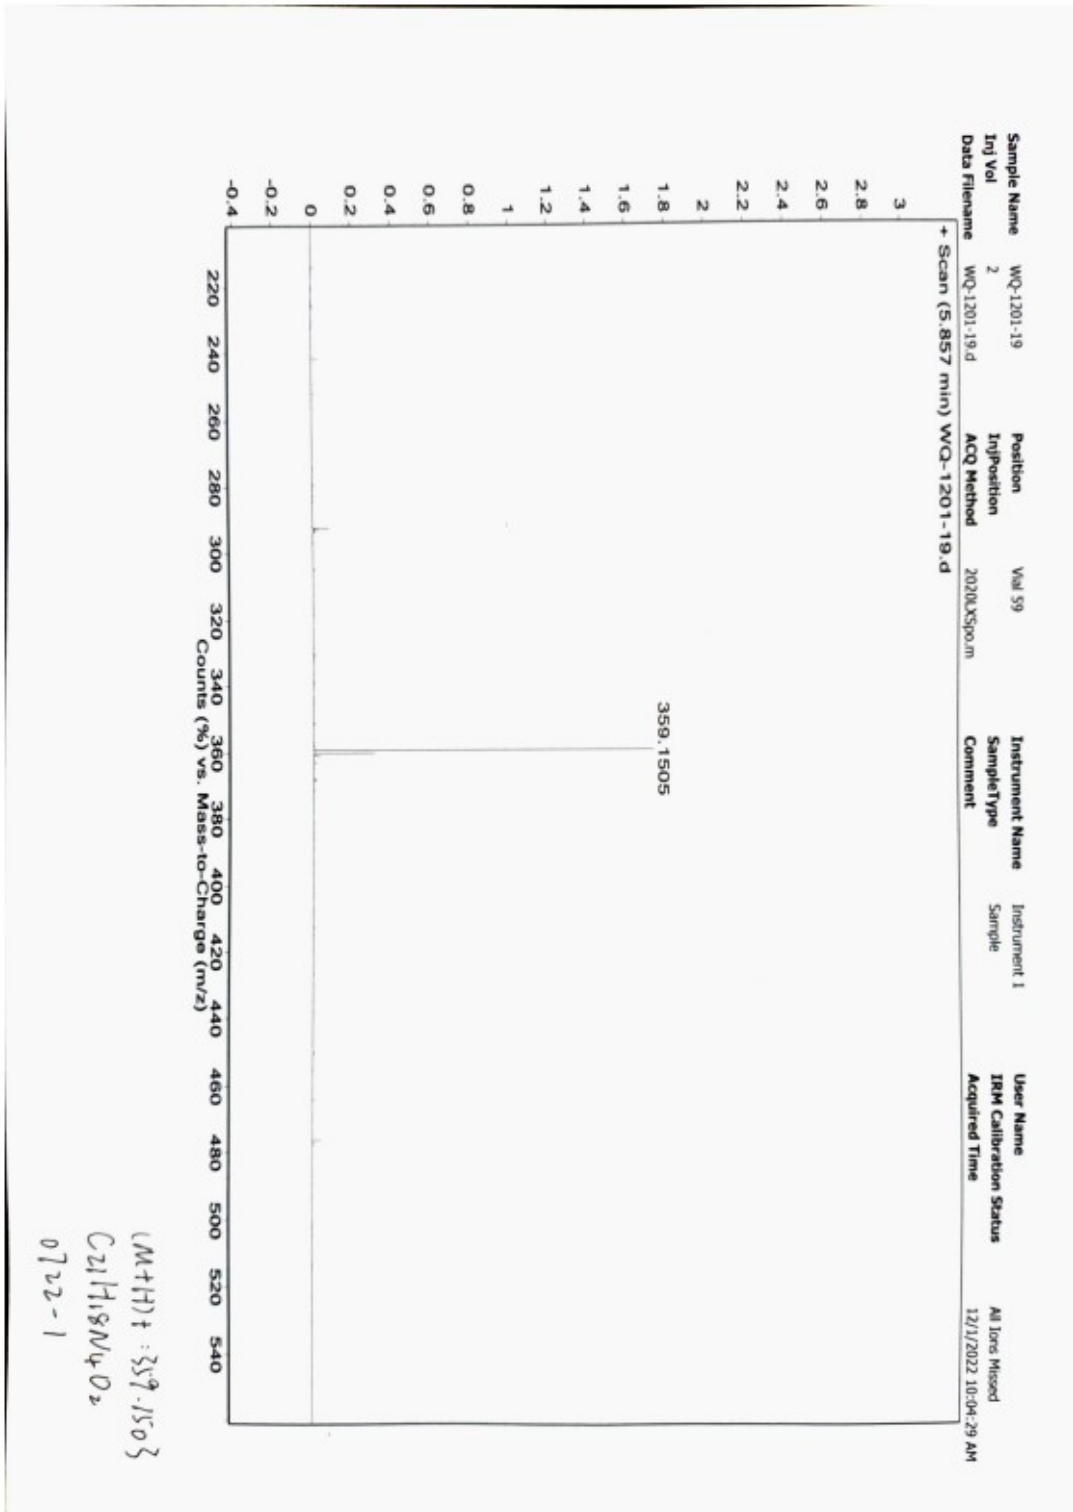

HRMS (ESI) spectrum of 12

1-(3-((1H-pyrrolo[2,3-b]pyridin-5-yl)oxy)phenyl)-3-(4-(trifluoromethyl)phenyl)urea

(13)

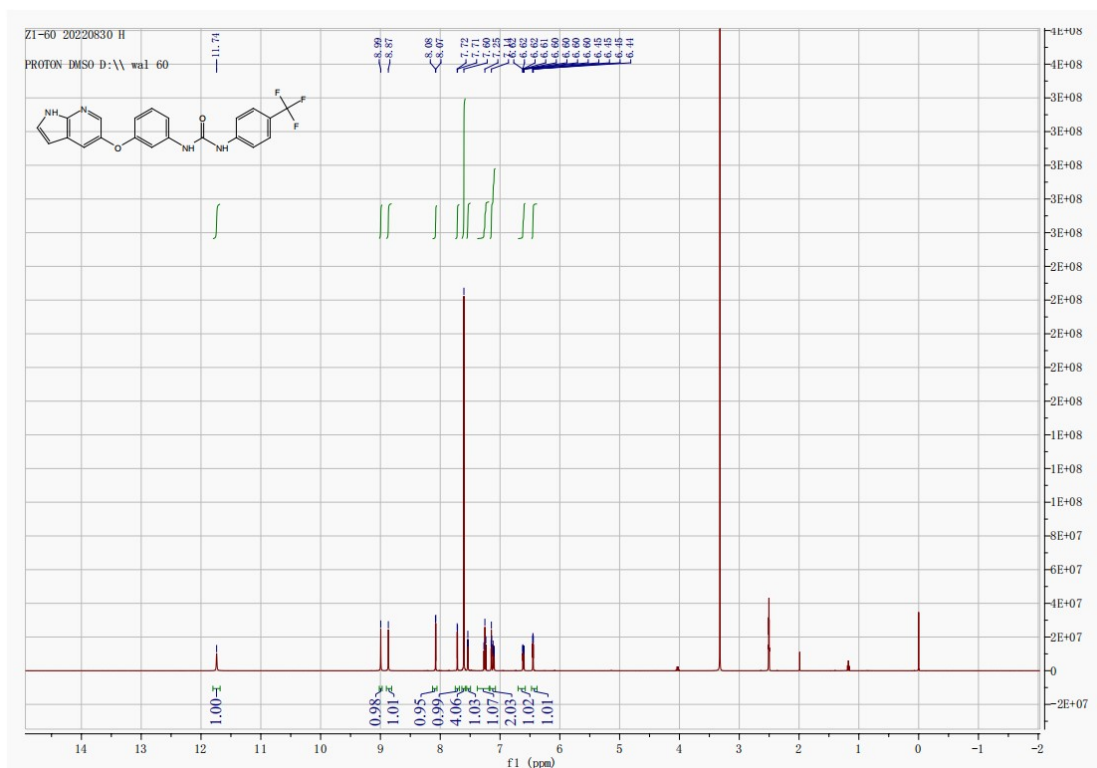

<sup>1</sup>H NMR spectrum of 13

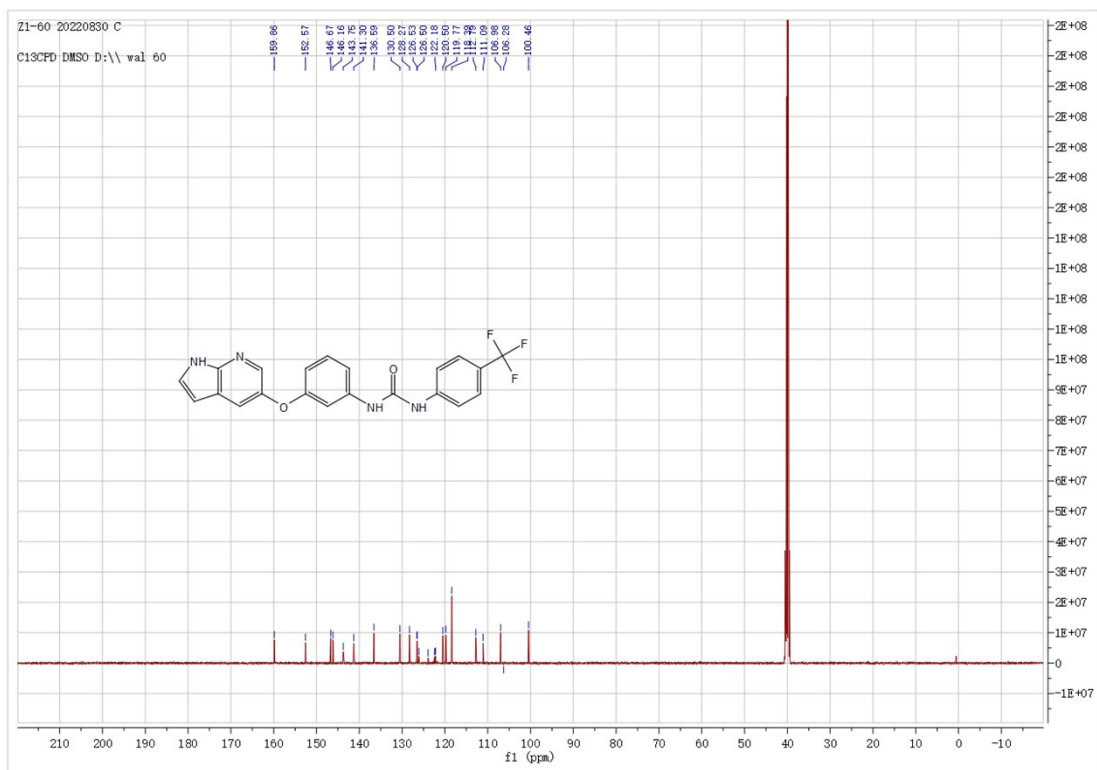

<sup>13</sup>C NMR spectrum of 13

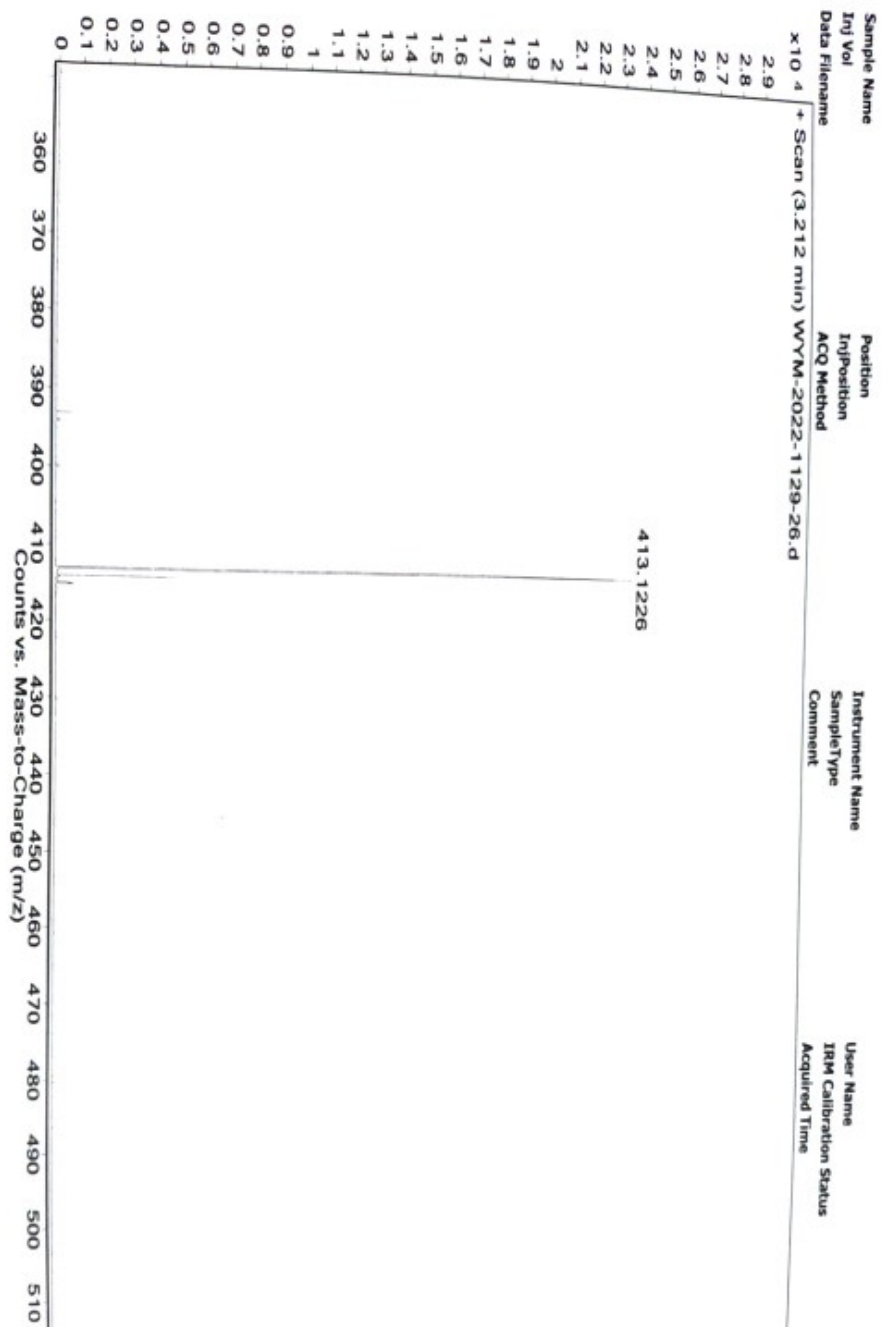

413.1226  
 (2.11915E-3) 1402  
 0729-4

HRMS (ESI) spectrum of 13

*1-(3-((1H-pyrrolo[2,3-b]pyridin-5-yl)oxy)phenyl)-3-(4-methoxyphenyl)urea (14)*

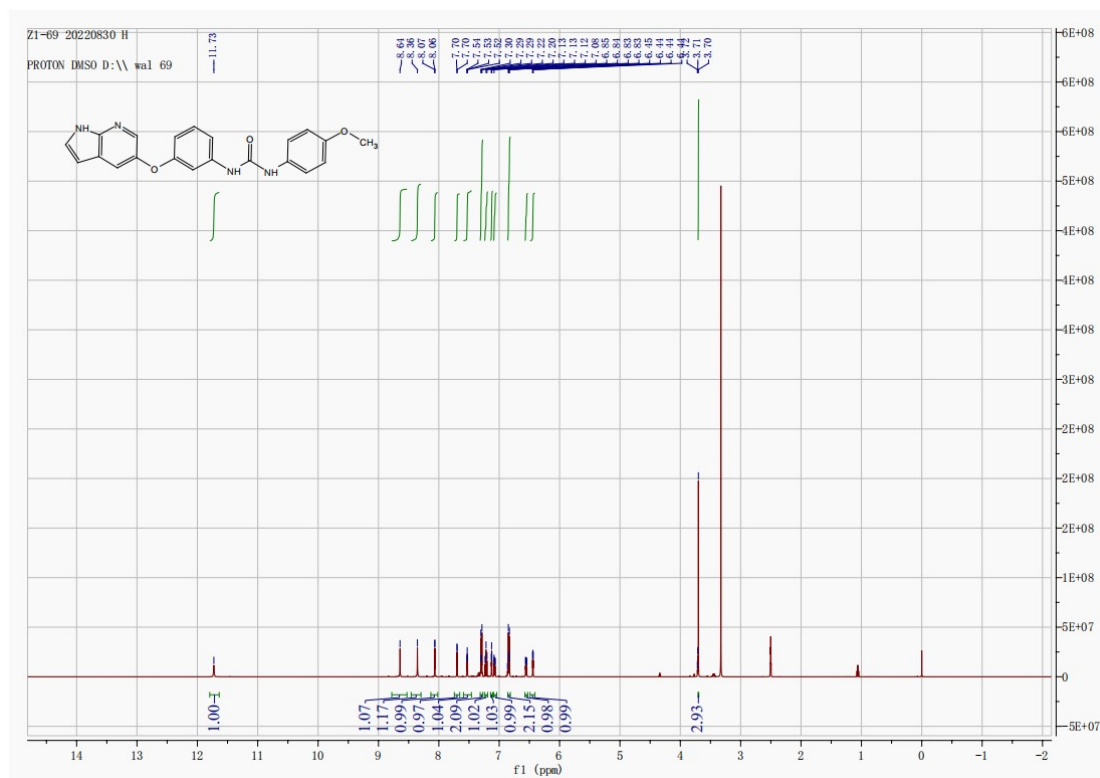

<sup>1</sup>H NMR spectrum of 14

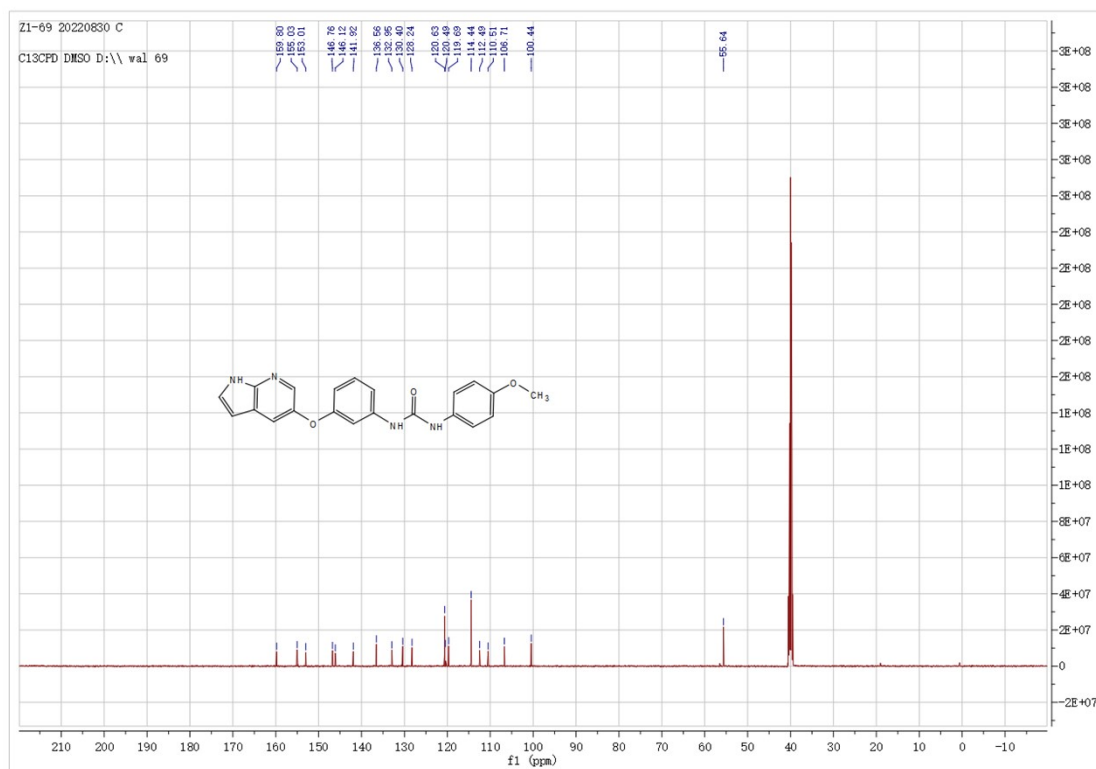

<sup>13</sup>C NMR spectrum of 14



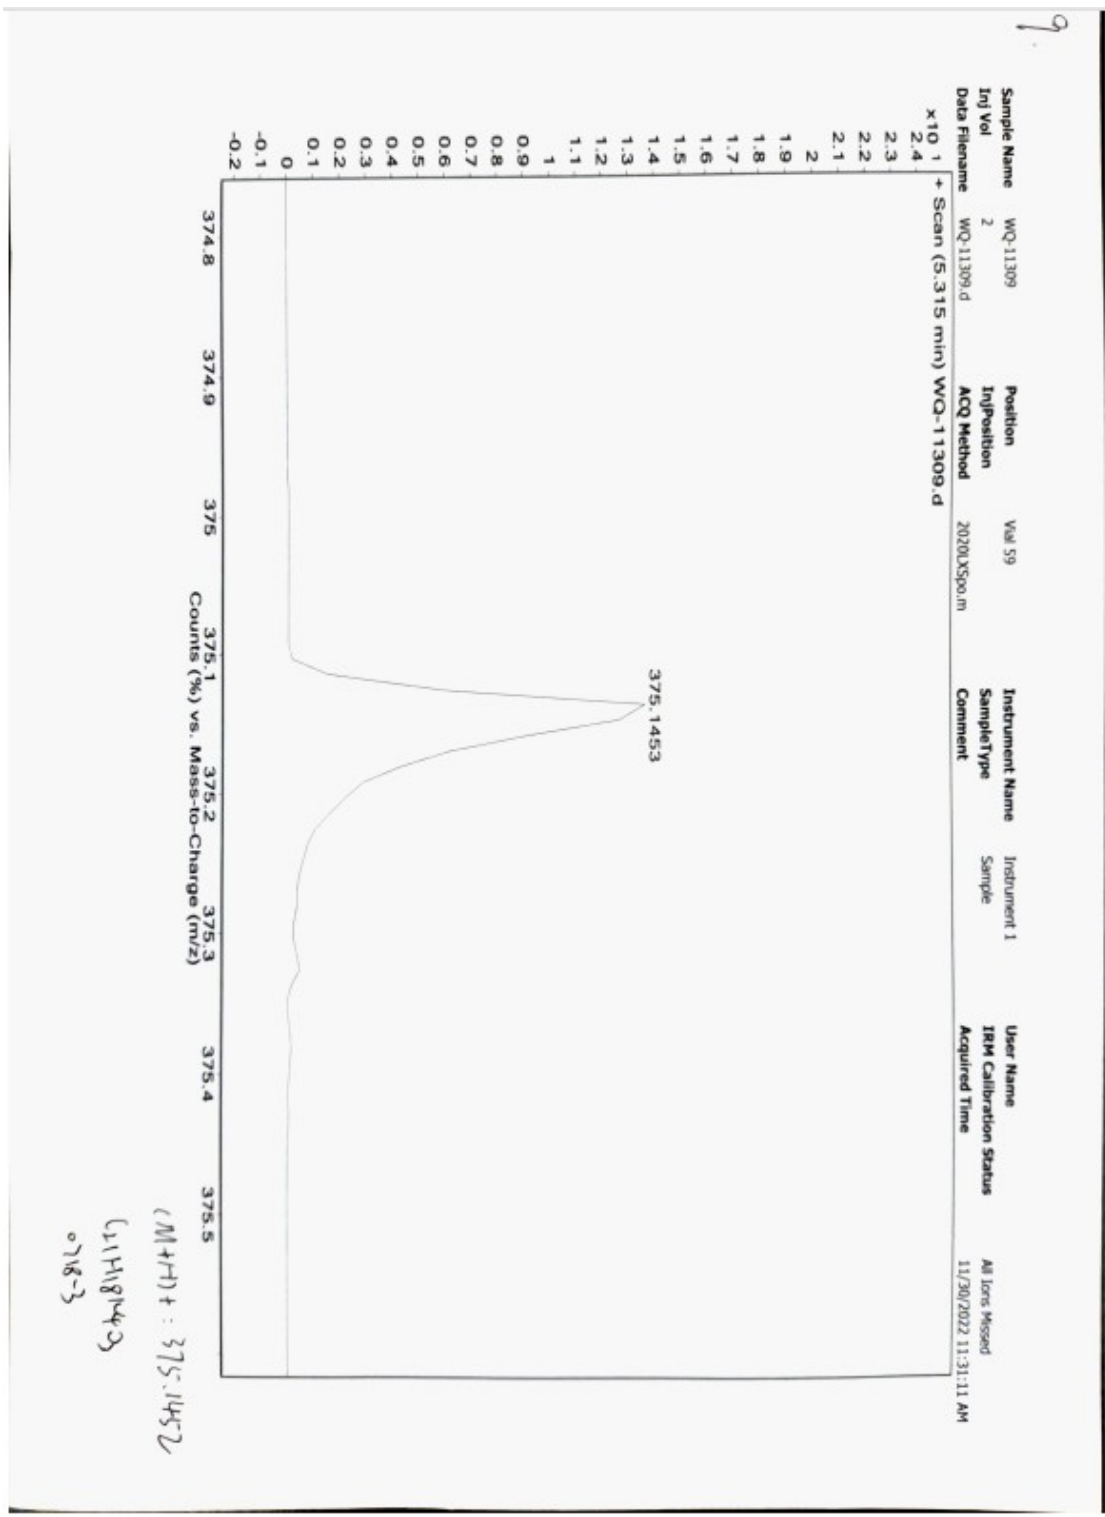

HRMS (ESI) spectrum of 14



17

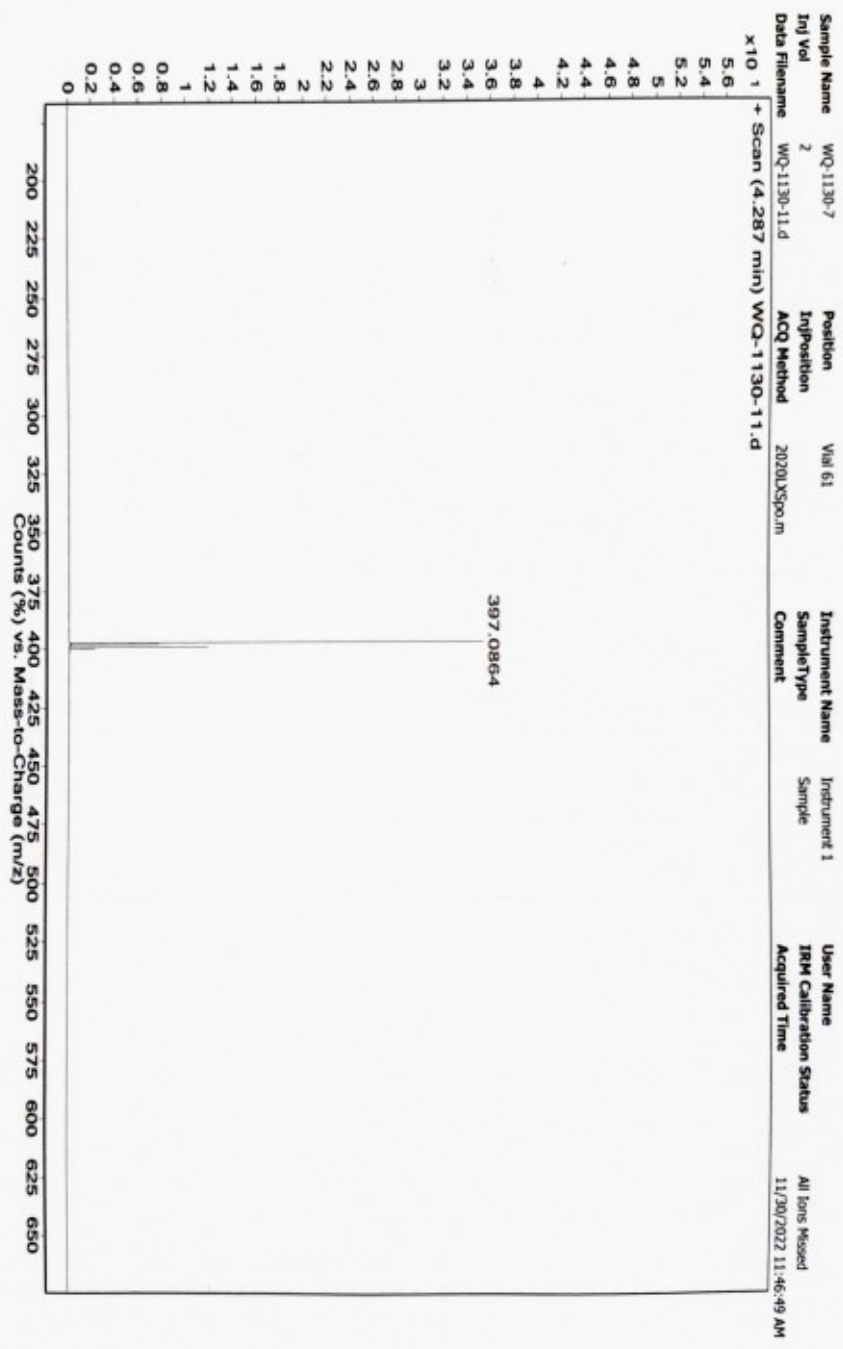

$M+H = 397.0862$   
 $C_{20}H_{14}ClFNa_2$   
07187

HRMS (ESI) spectrum of 15

1-(3-((1*H*-pyrrolo[2,3-*b*]pyridin-5-yl)oxy)phenyl)-3-(4-chloro-3-(trifluoromethyl)phenyl)urea (**16**)

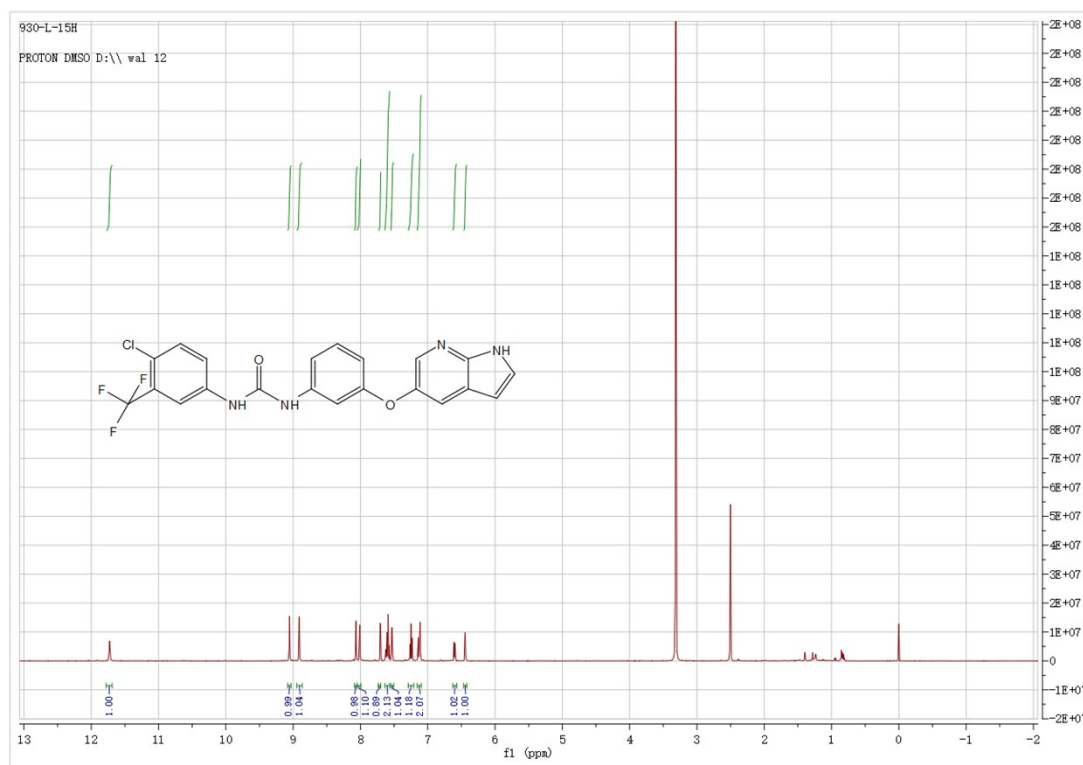

<sup>1</sup>H NMR spectrum of **16**

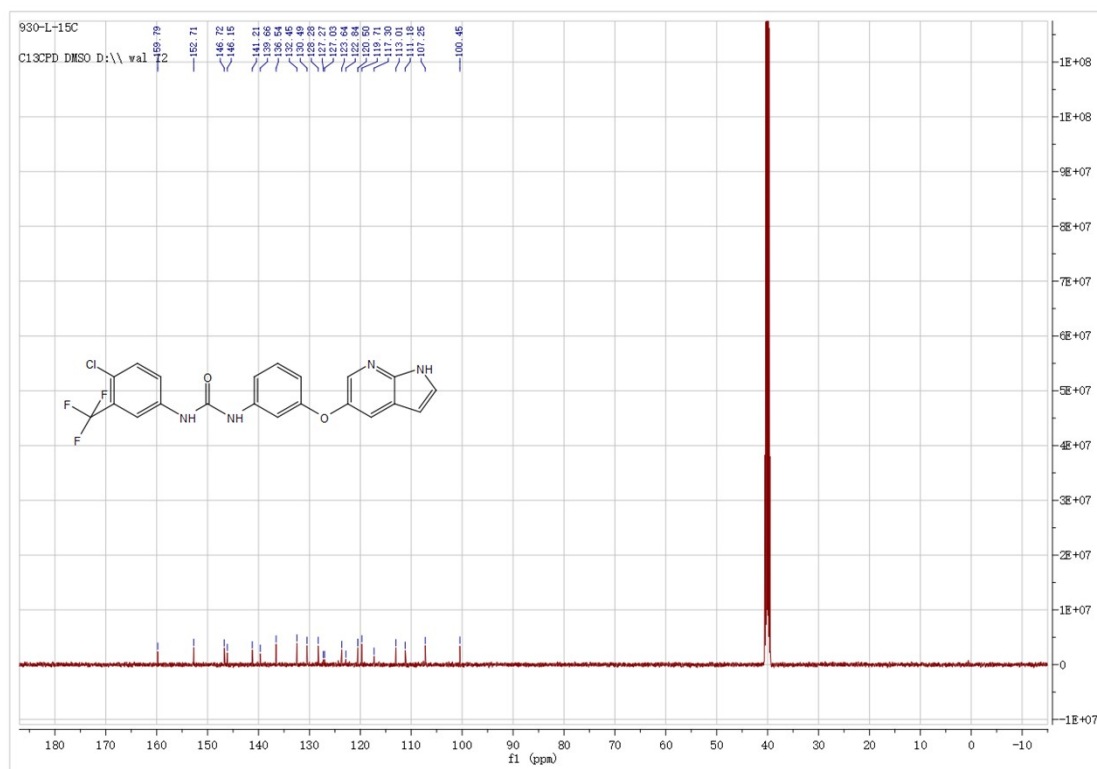

<sup>13</sup>C NMR spectrum of **16**

C211144027301

ca 201 247.083

All Ions Missed  
7/25/2021 8:29:05 AM

Sample Name ZXX-0725-05  
Inj Vol 2  
Data Filename ZXX-0725-05.d  
Vial 5  
Position InjPosition  
ACQ Method  
Instrument Name Sample  
Instrument 1  
User Name HRM  
Calibration Status  
Acquired Time

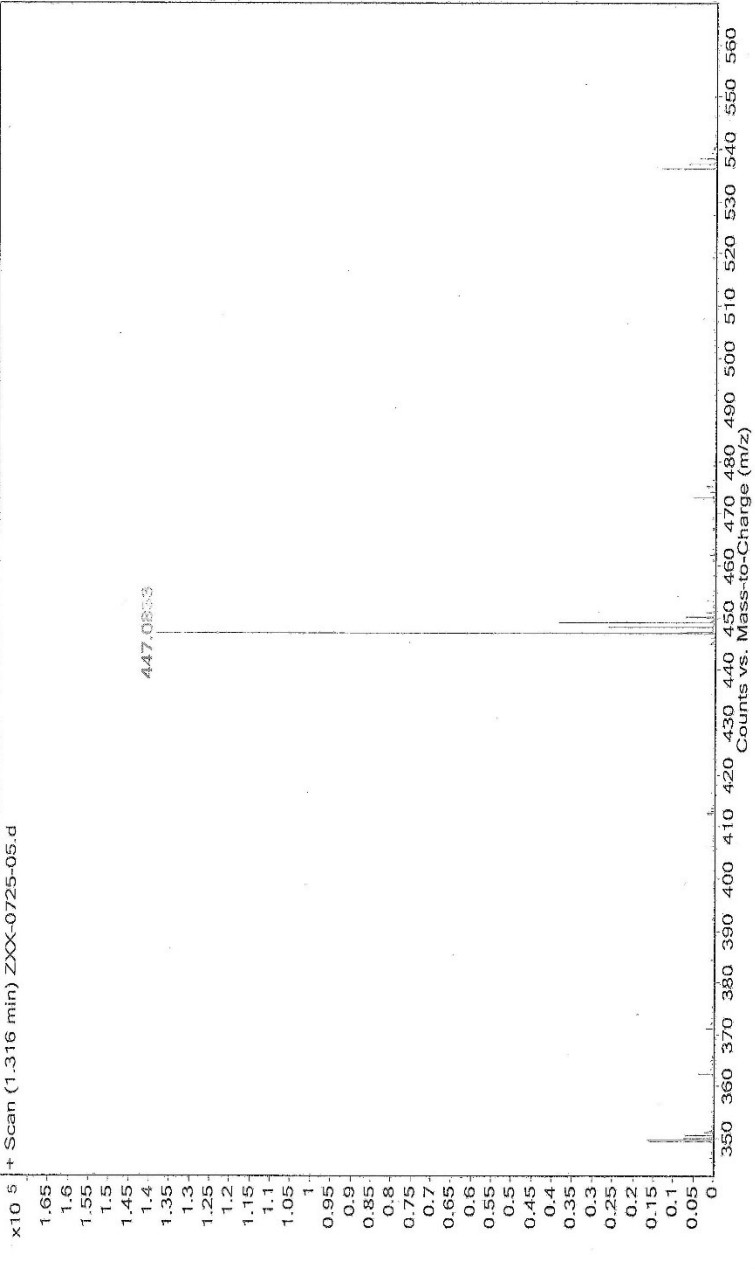

0605-2

HRMS (ESI) spectrum of 16

1-(3-((1H-pyrrolo[2,3-b]pyridin-5-yl)oxy)phenyl)-3-(3-chloro-4-methylphenyl)urea

(17)

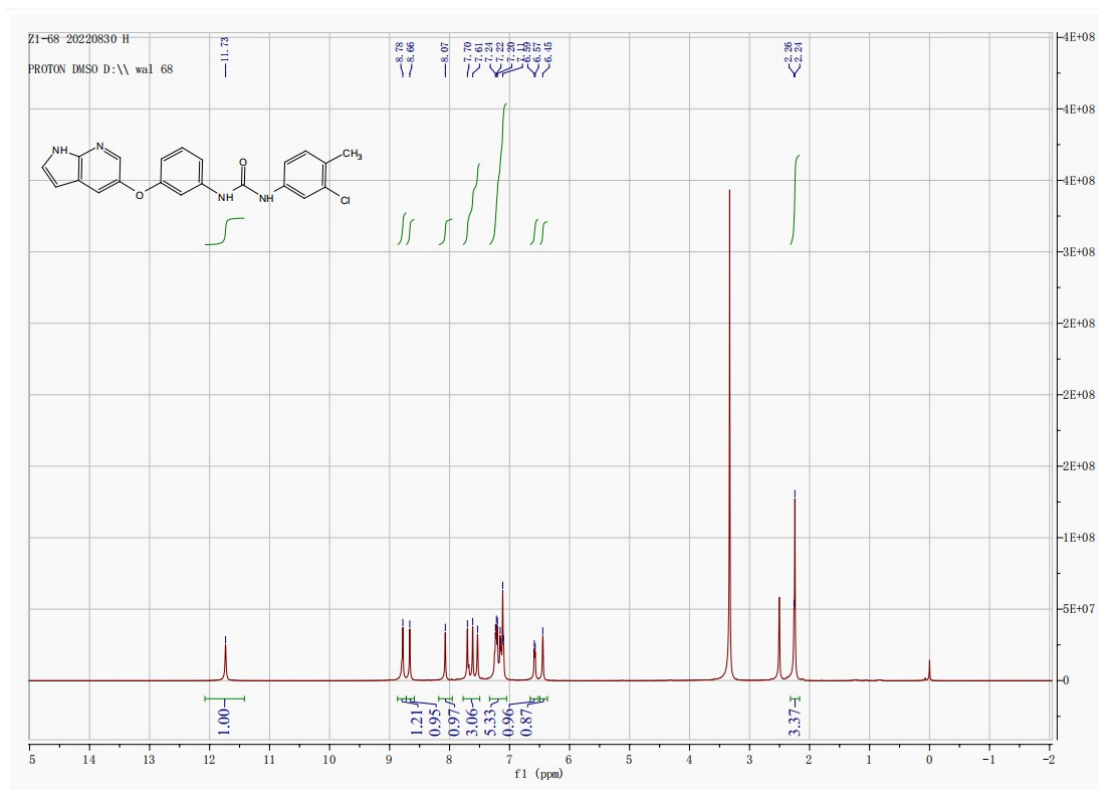

<sup>1</sup>H NMR spectrum of 17

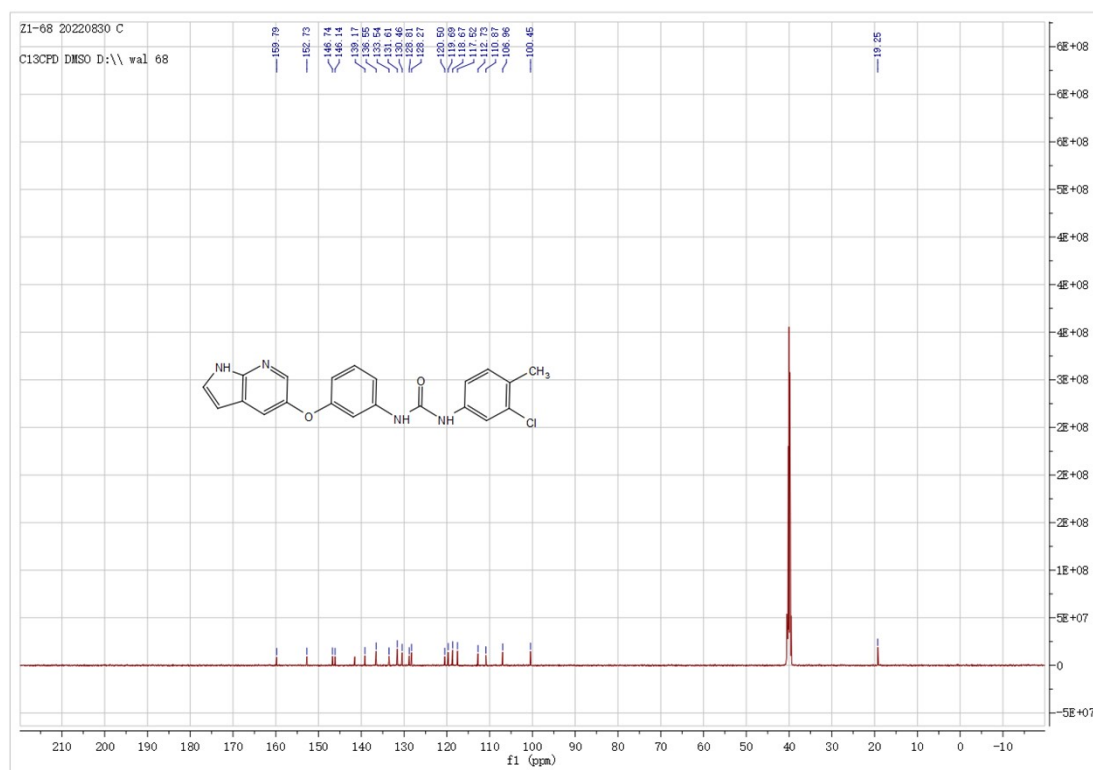

<sup>13</sup>C NMR spectrum of 17

18

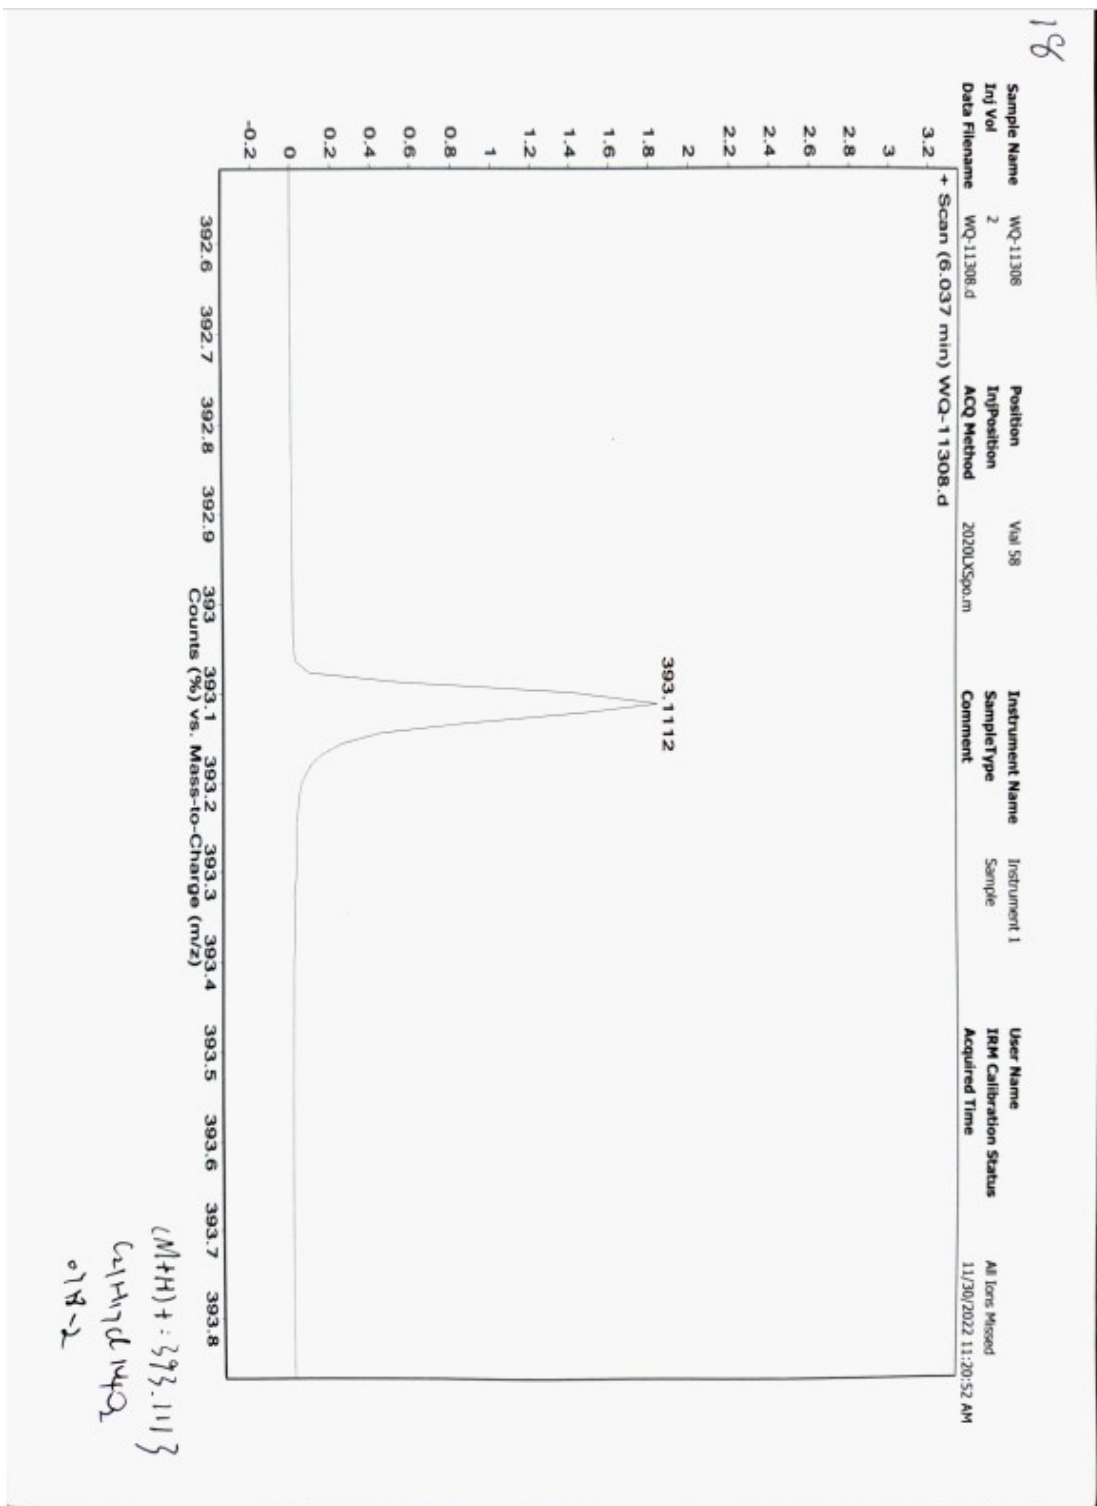

HRMS (ESI) spectrum of 17

*1-(3-((1H-pyrrolo[2,3-b]pyridin-5-yl)oxy)phenyl)-3-(4-methyl-3-(trifluoromethyl)phenyl)urea (18)*

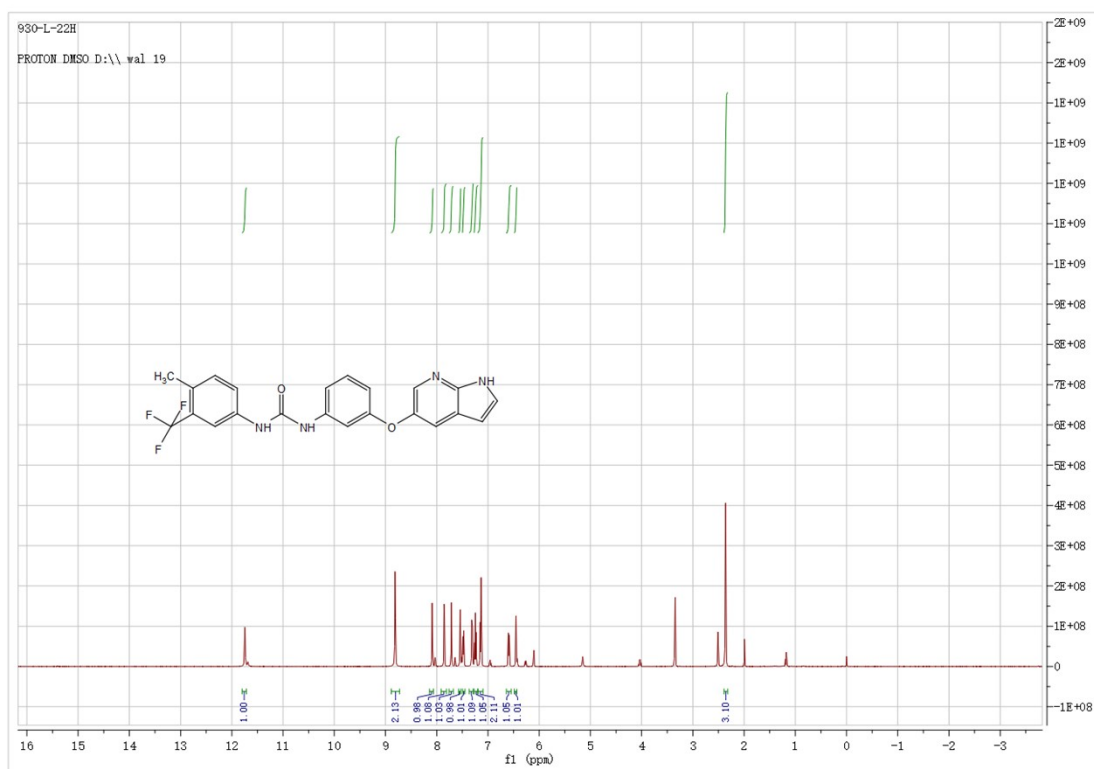

<sup>1</sup>H NMR spectrum of **18**

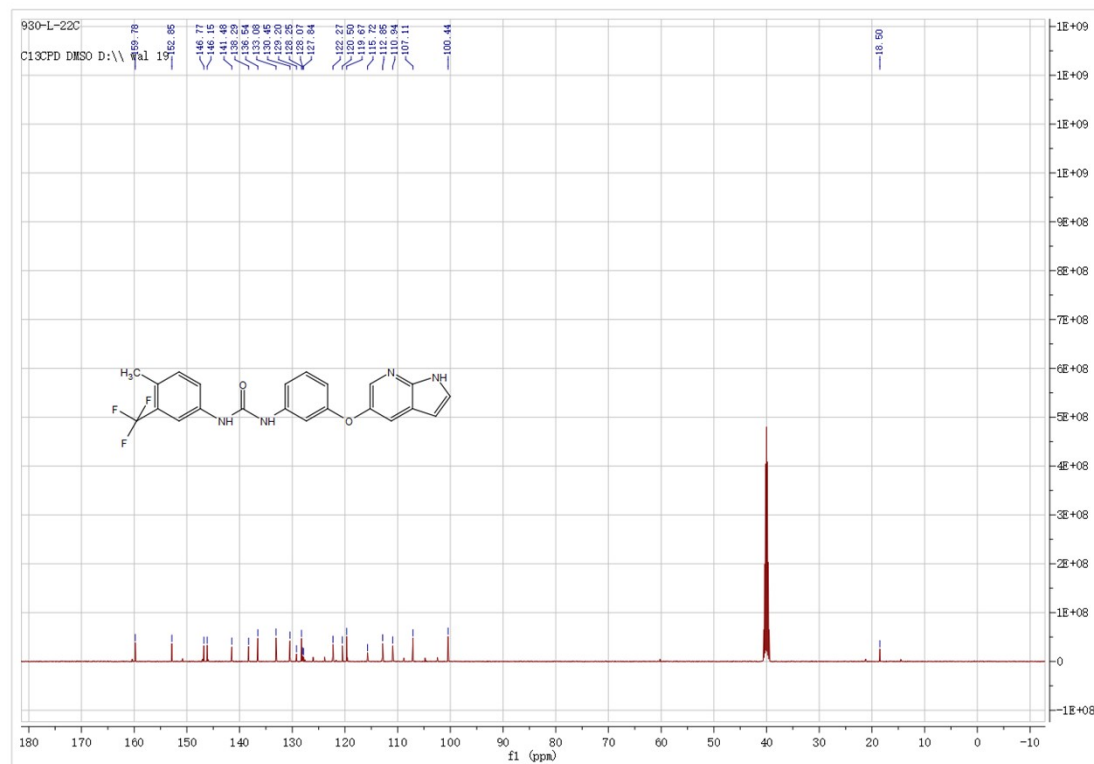

<sup>13</sup>C NMR spectrum of **18**





C22H17N4O2ES  
012447: 47.1376

All Ions Missed  
7/29/2021 10:18:41 AM

User Name  
IRM Calibration Status  
Acquired Time

Instrument 1  
Sample

Instrument Name  
Sample Type  
Comment

Vial 42  
2020LXSp00.m

Position  
Inj Position  
ACQ Method

ZXX-0729-12  
2

ZXX-0729-12.d

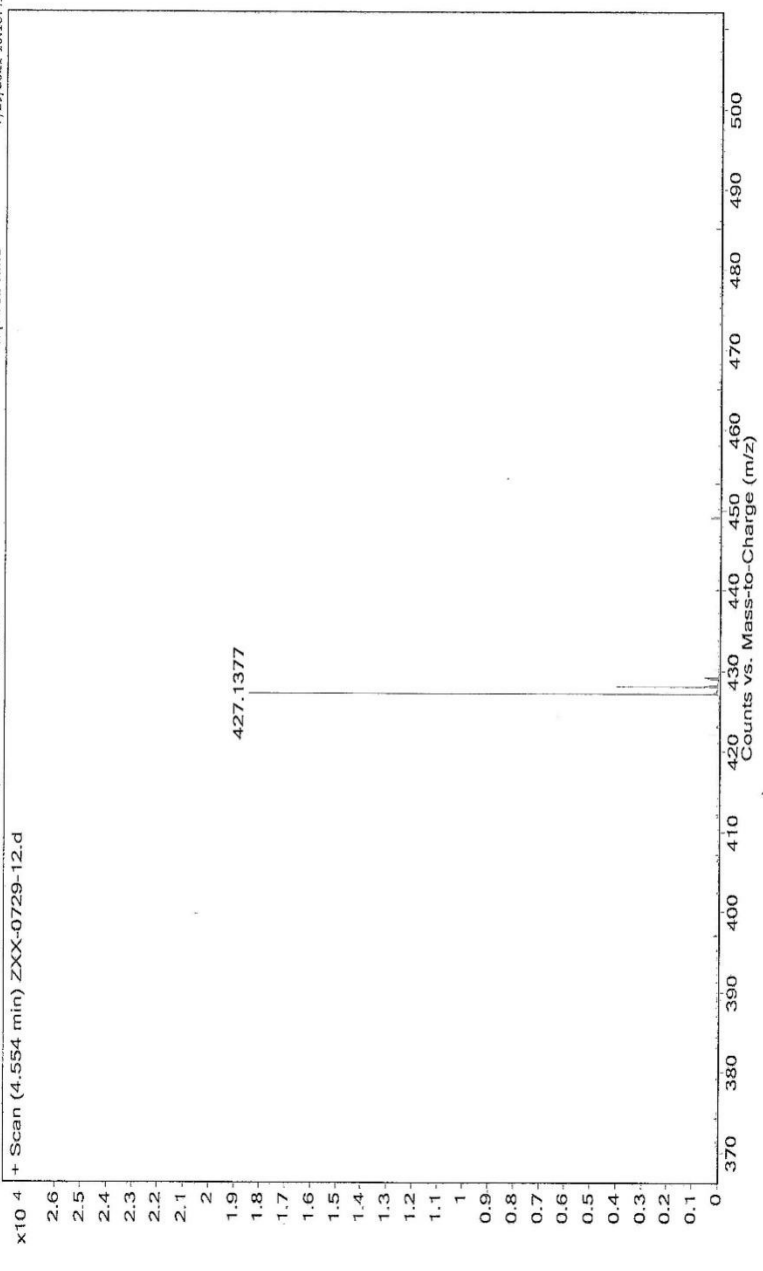

0626-1

HRMS (ESI) spectrum of 18

1-(3-((1H-pyrrolo[2,3-b]pyridin-5-yl)oxy)phenyl)-3-(3,4-dichlorophenyl)urea (19)

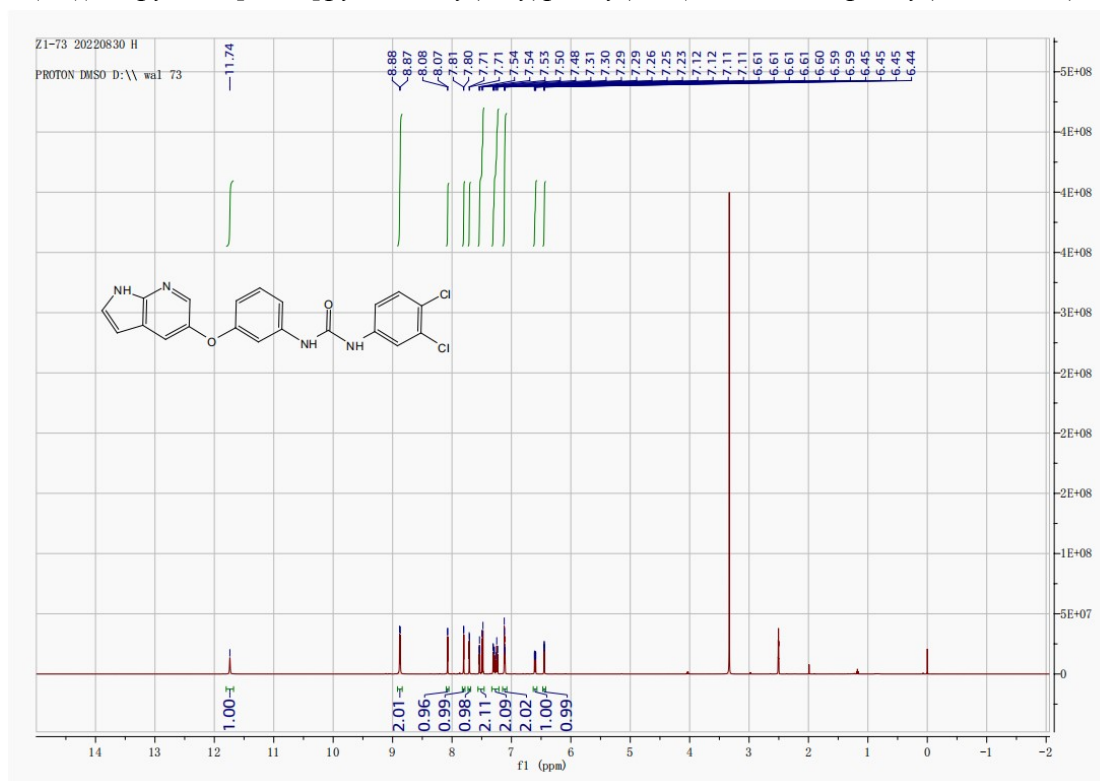

<sup>1</sup>H NMR spectrum of 19

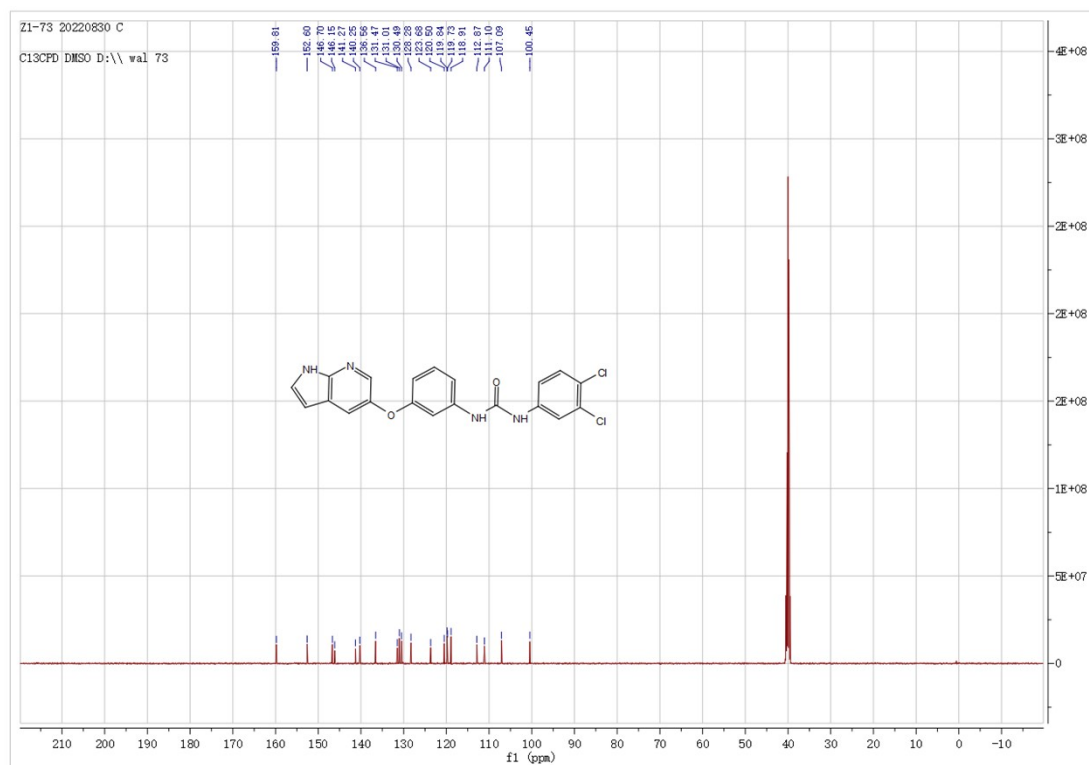

<sup>13</sup>C NMR spectrum of 19

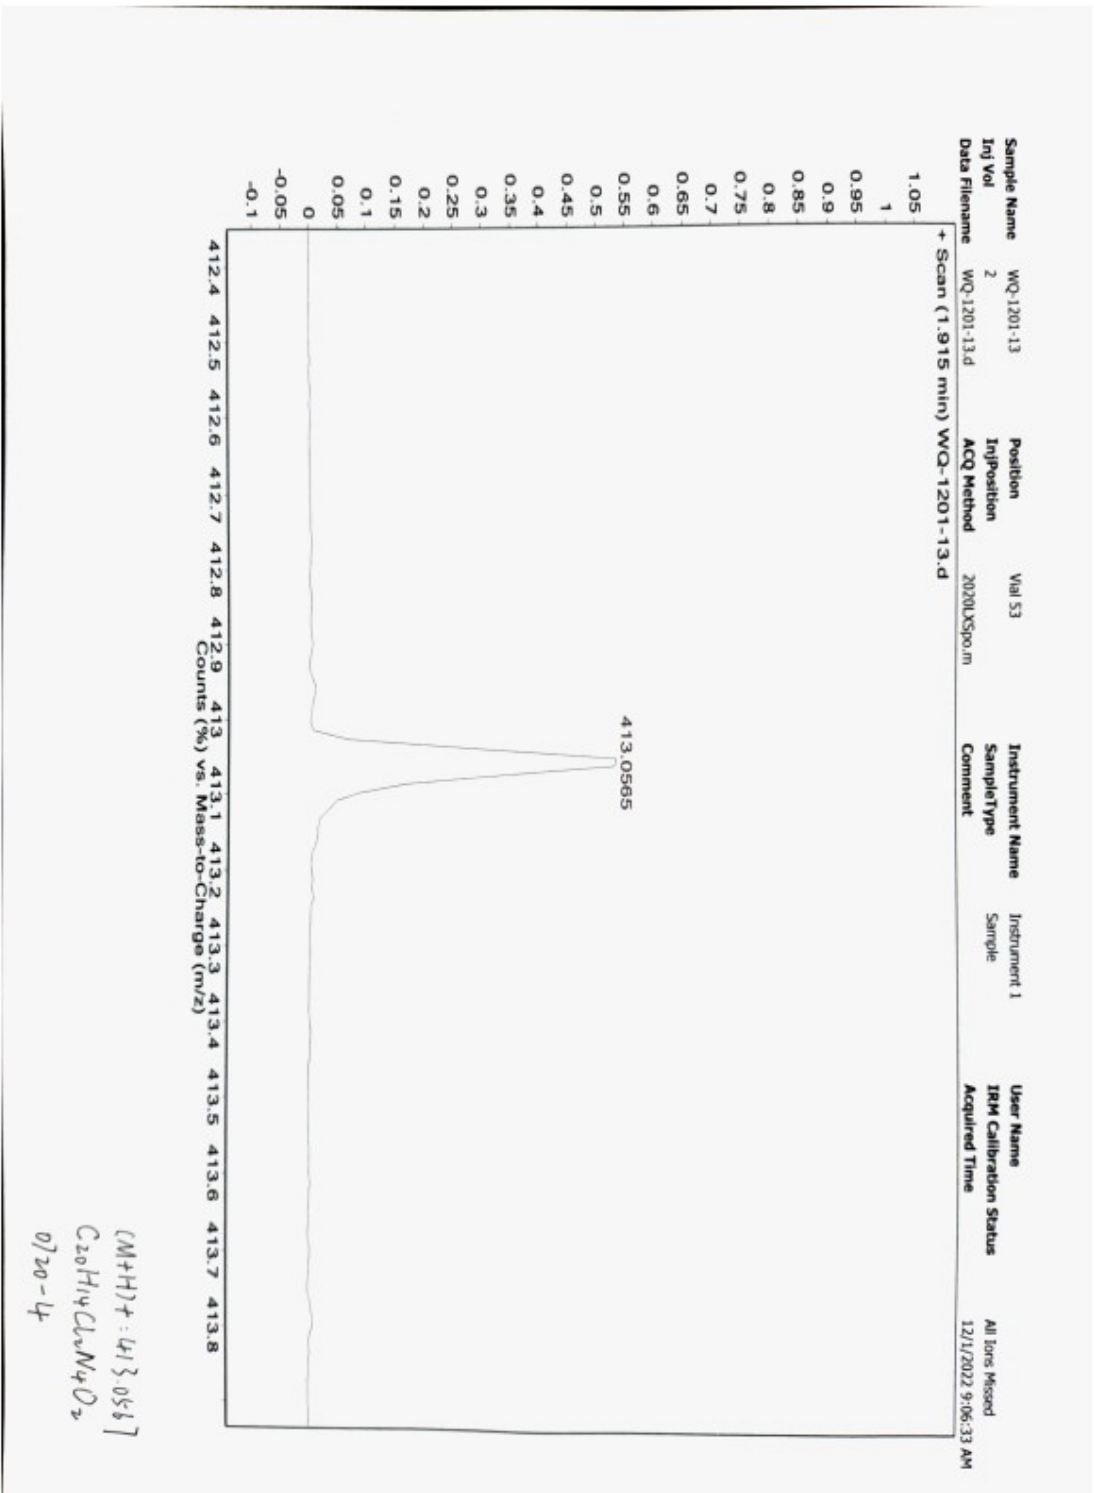

HRMS (ESI) spectrum of 19

*1-(3-((1H-pyrrolo[2,3-b]pyridin-5-yl)oxy)phenyl)-3-(3,5-dichlorophenyl)urea (20)*

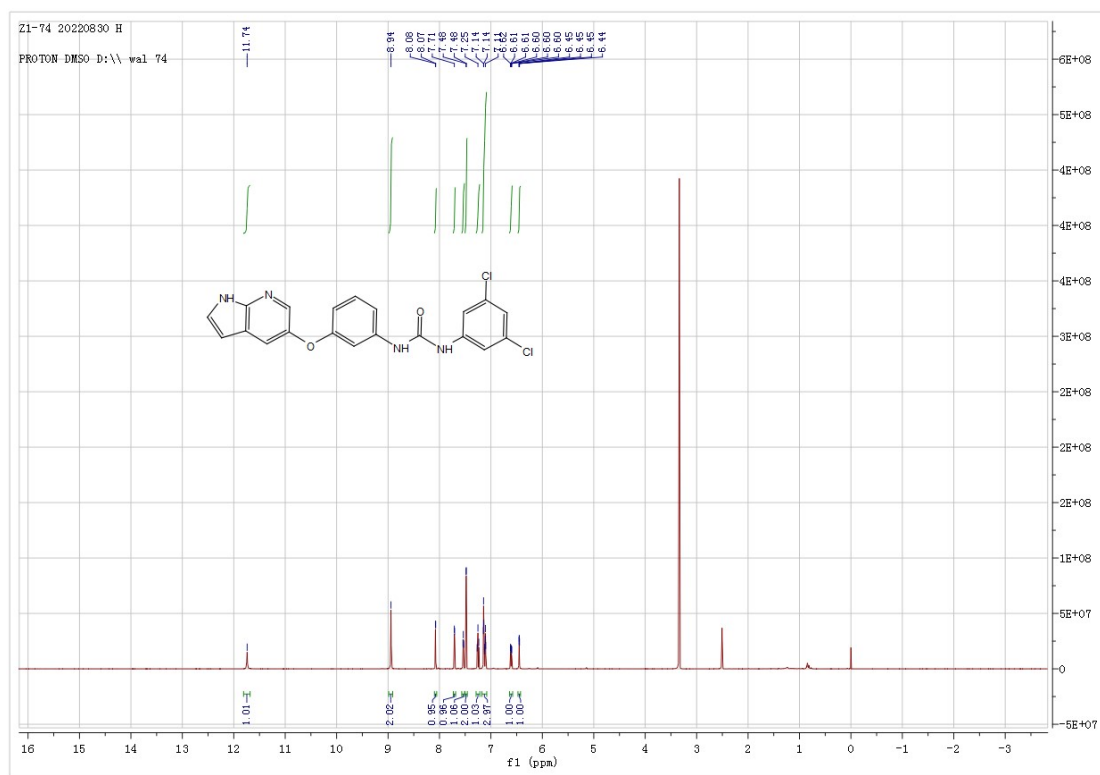

<sup>1</sup>H NMR spectrum of **20**

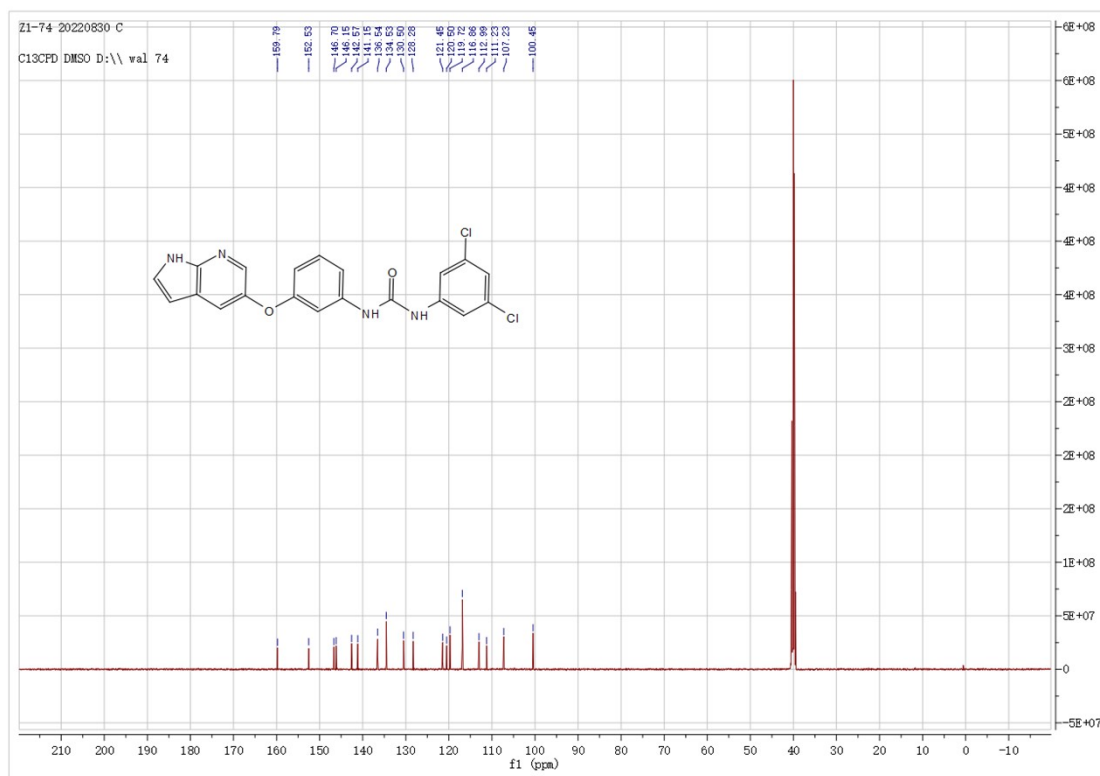

<sup>13</sup>C NMR spectrum of **20**

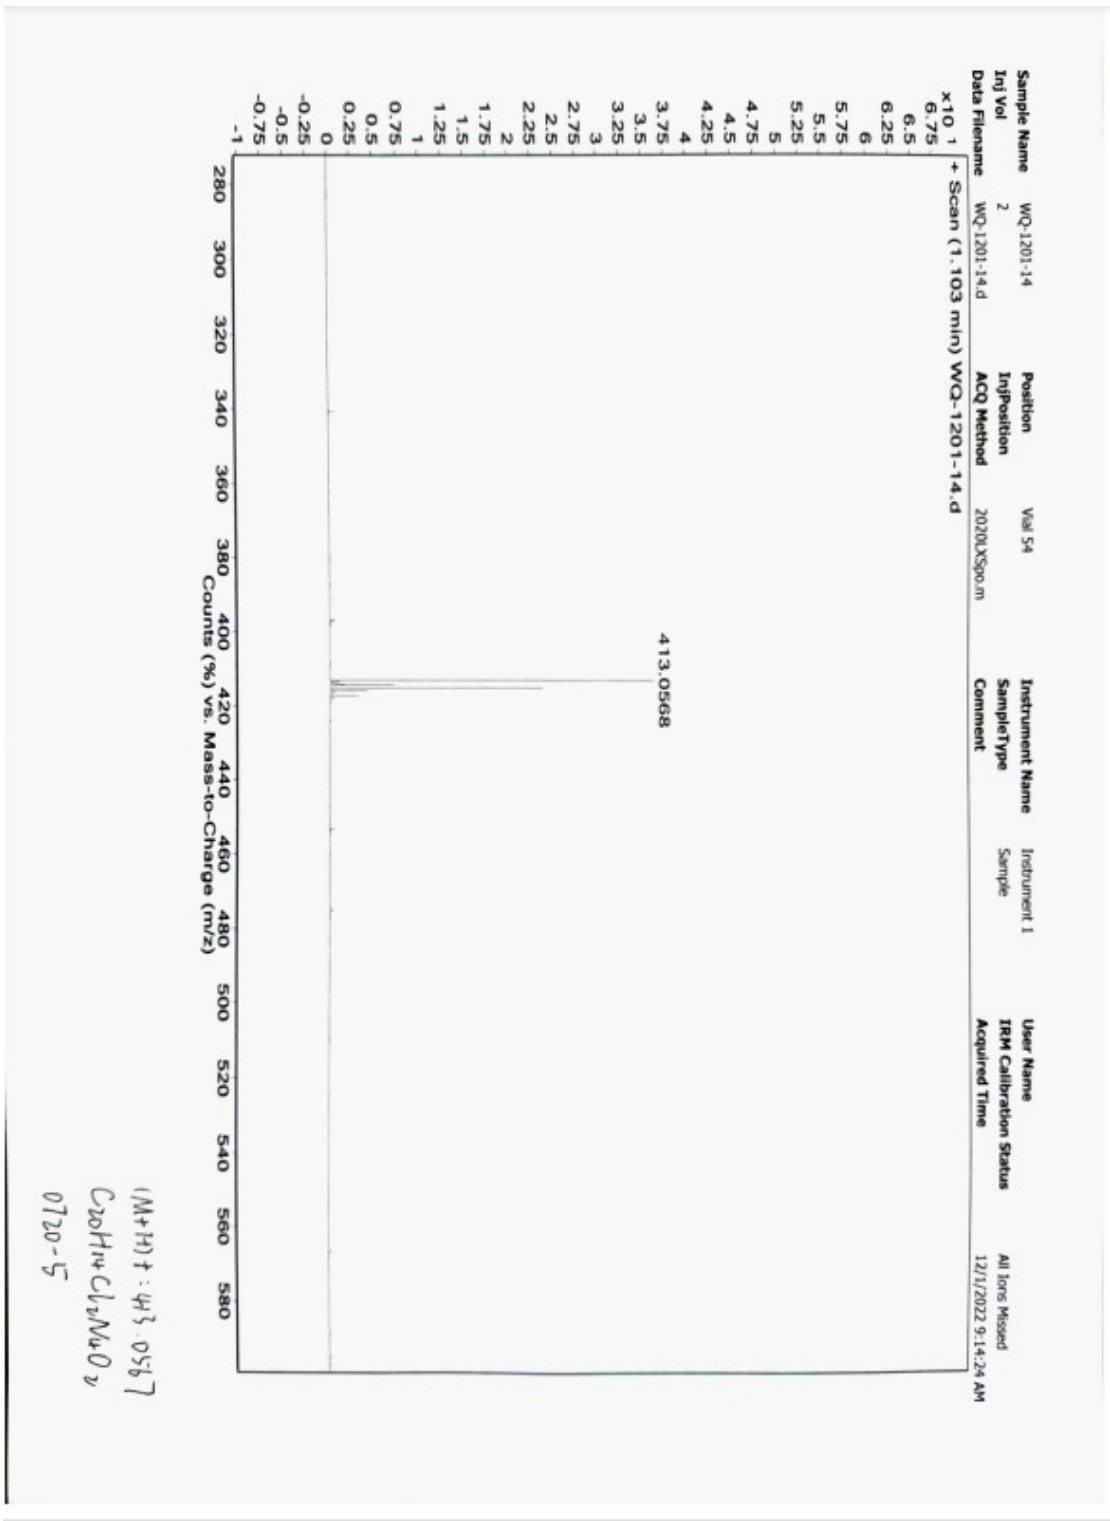

HRMS (ESI) spectrum of 20

*1-(3-((1H-pyrrolo[2,3-b]pyridin-5-yl)oxy)phenyl)-3-(2,3-dichlorophenyl)urea (21)*

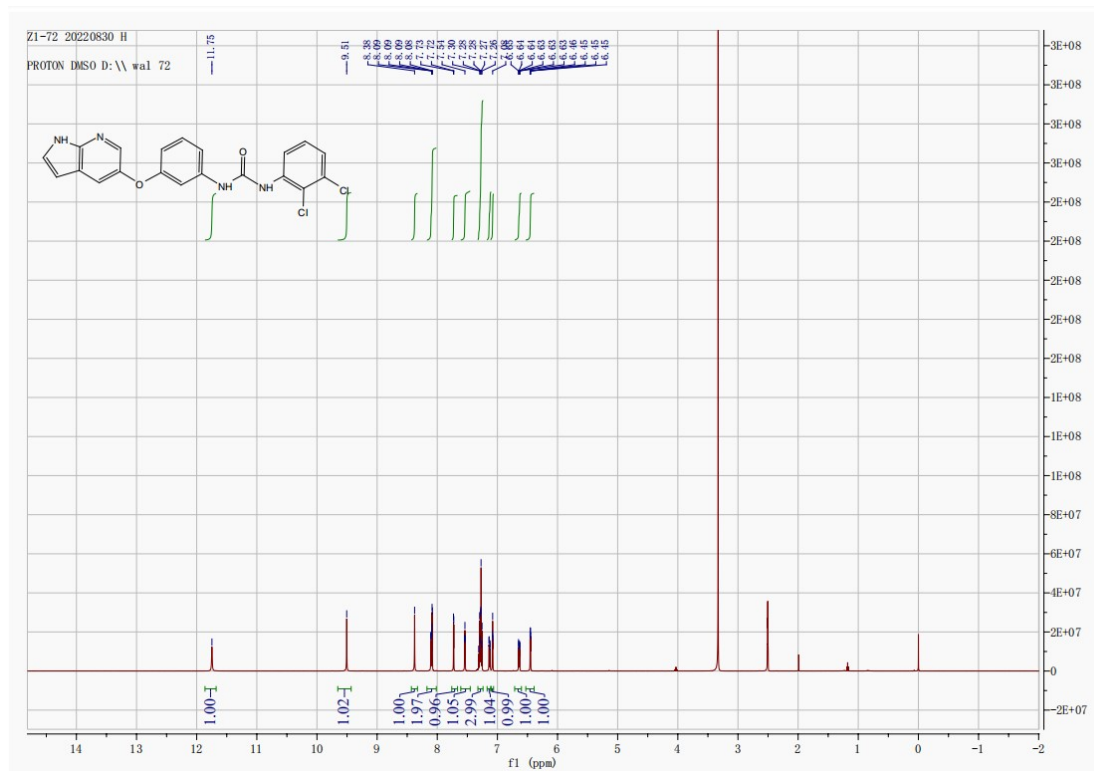

$^1\text{H}$  NMR spectrum of **21**

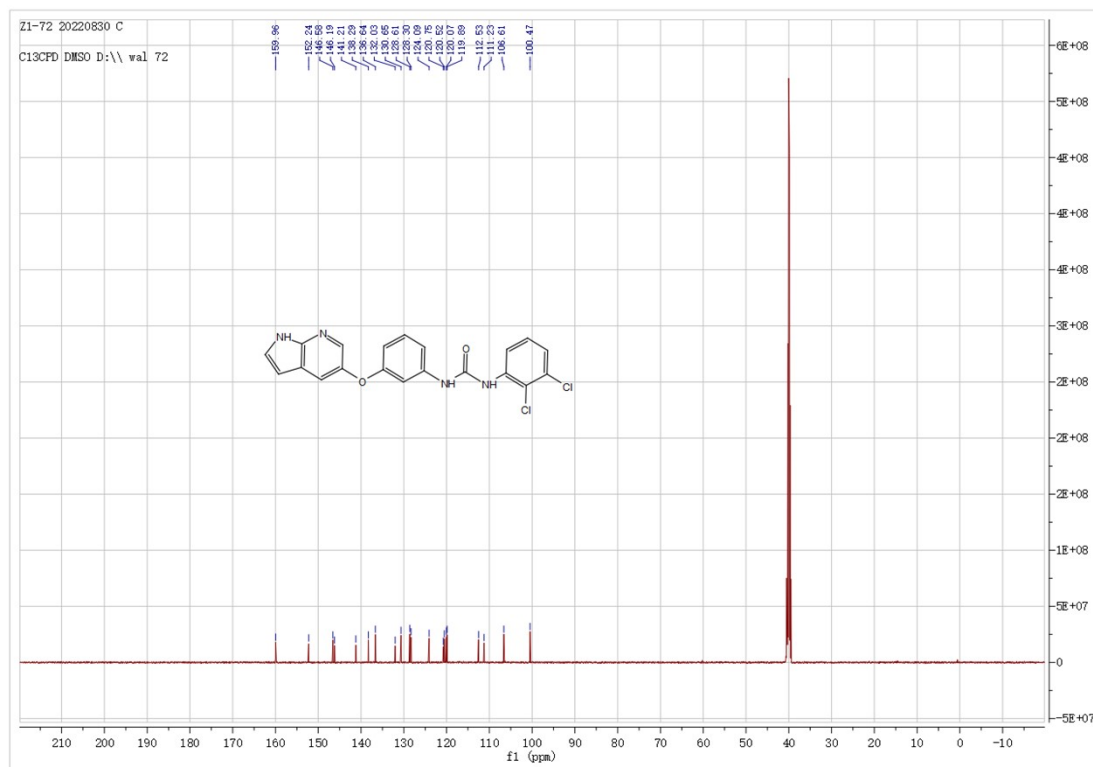

$^{13}\text{C}$  NMR spectrum of **21**

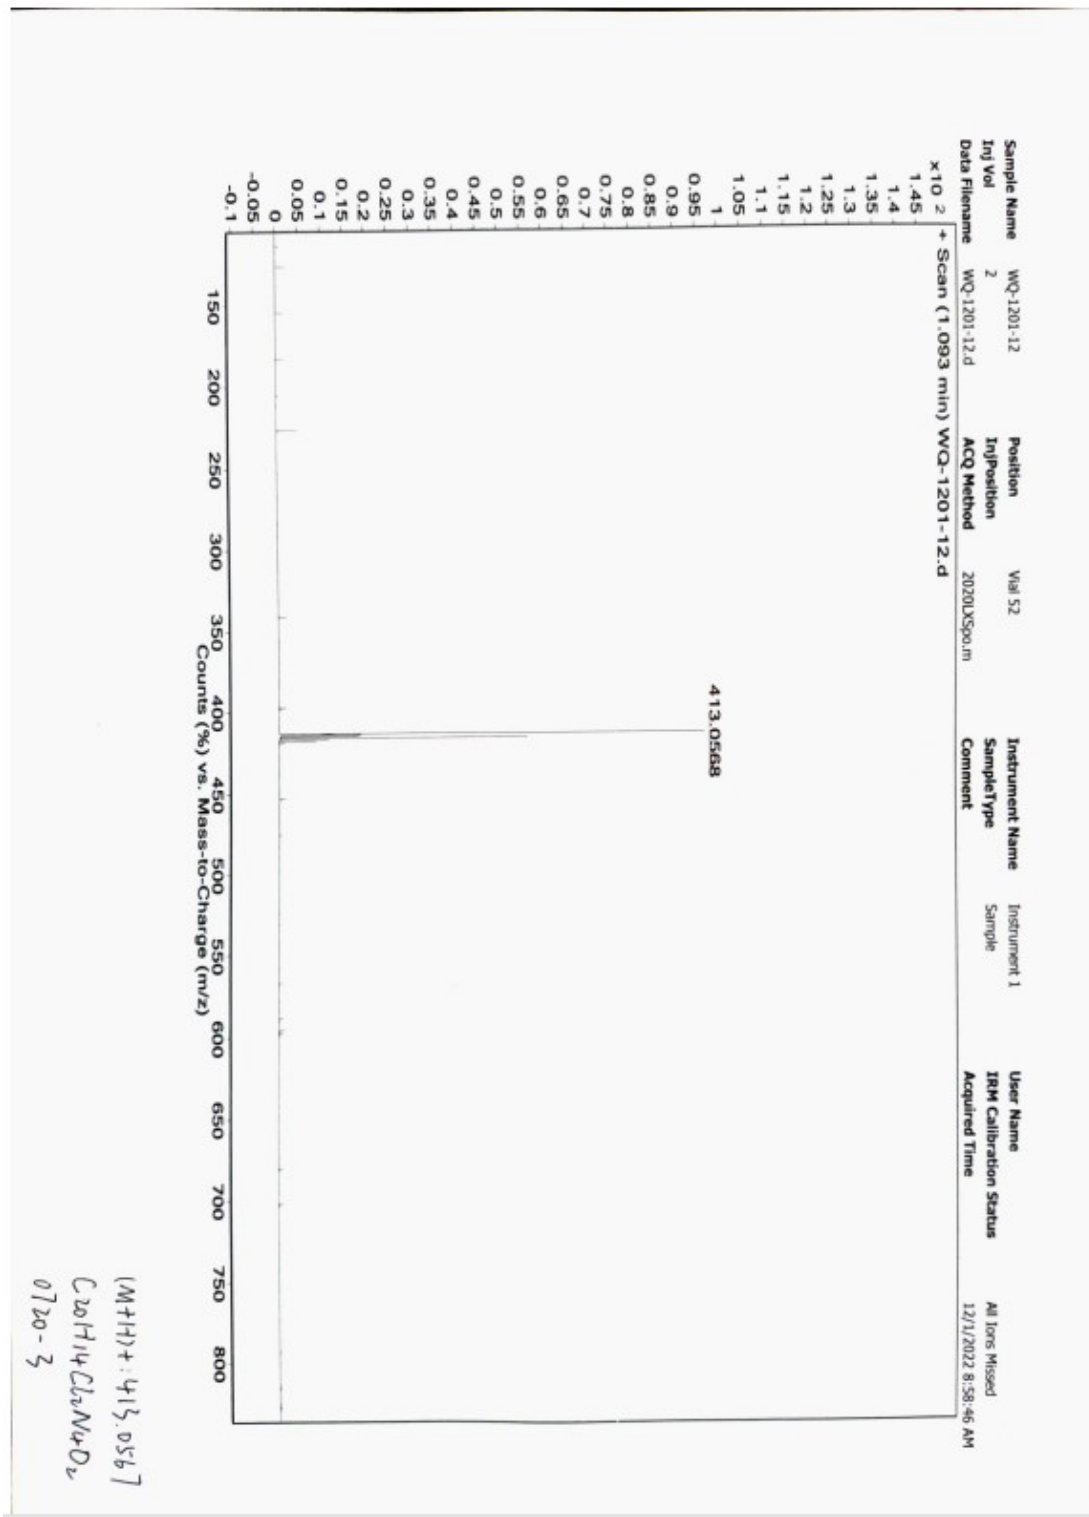

HRMS (ESI) spectrum of 21



*1-(4-((1H-pyrrolo[2,3-b]pyridin-5-yl)oxy)phenyl)-3-(2-fluorophenyl)urea (22)*

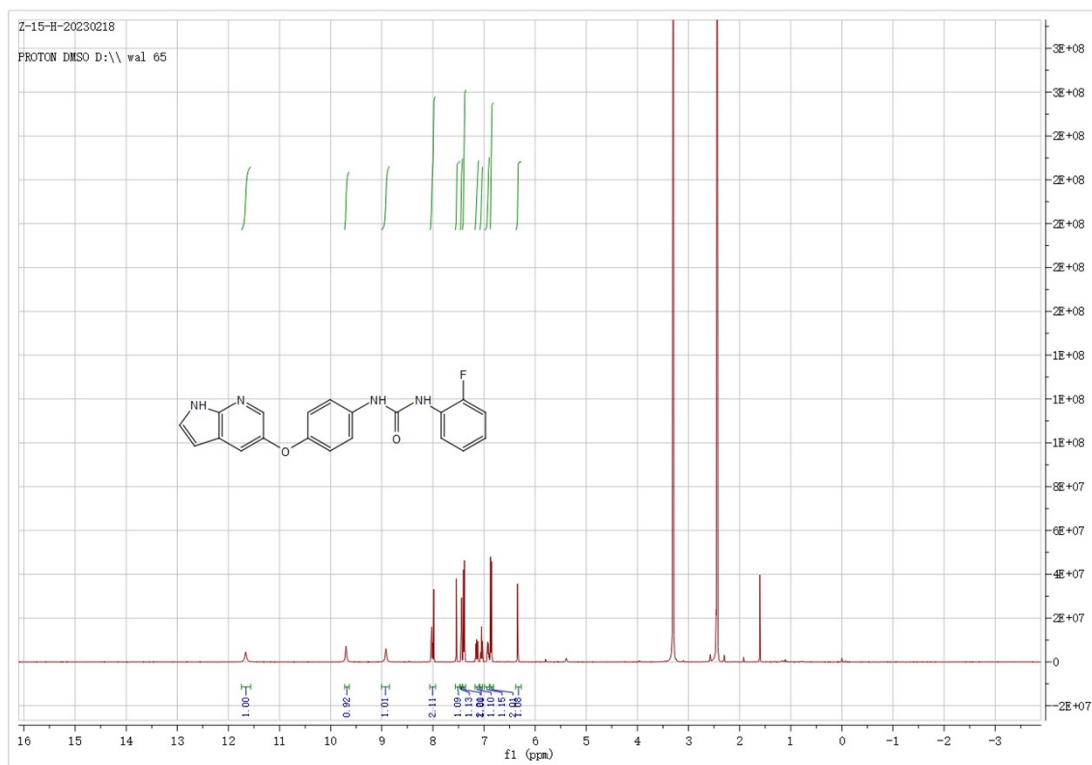

<sup>1</sup>H NMR spectrum of **22**

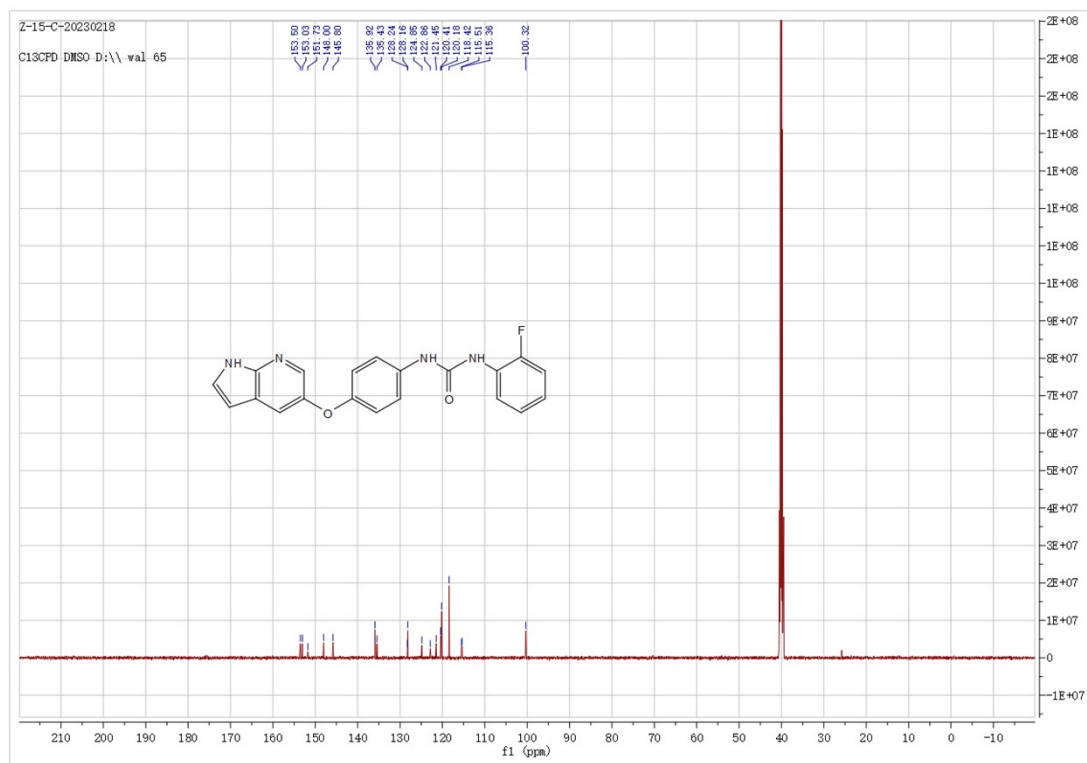

<sup>13</sup>C NMR spectrum of **22**

8

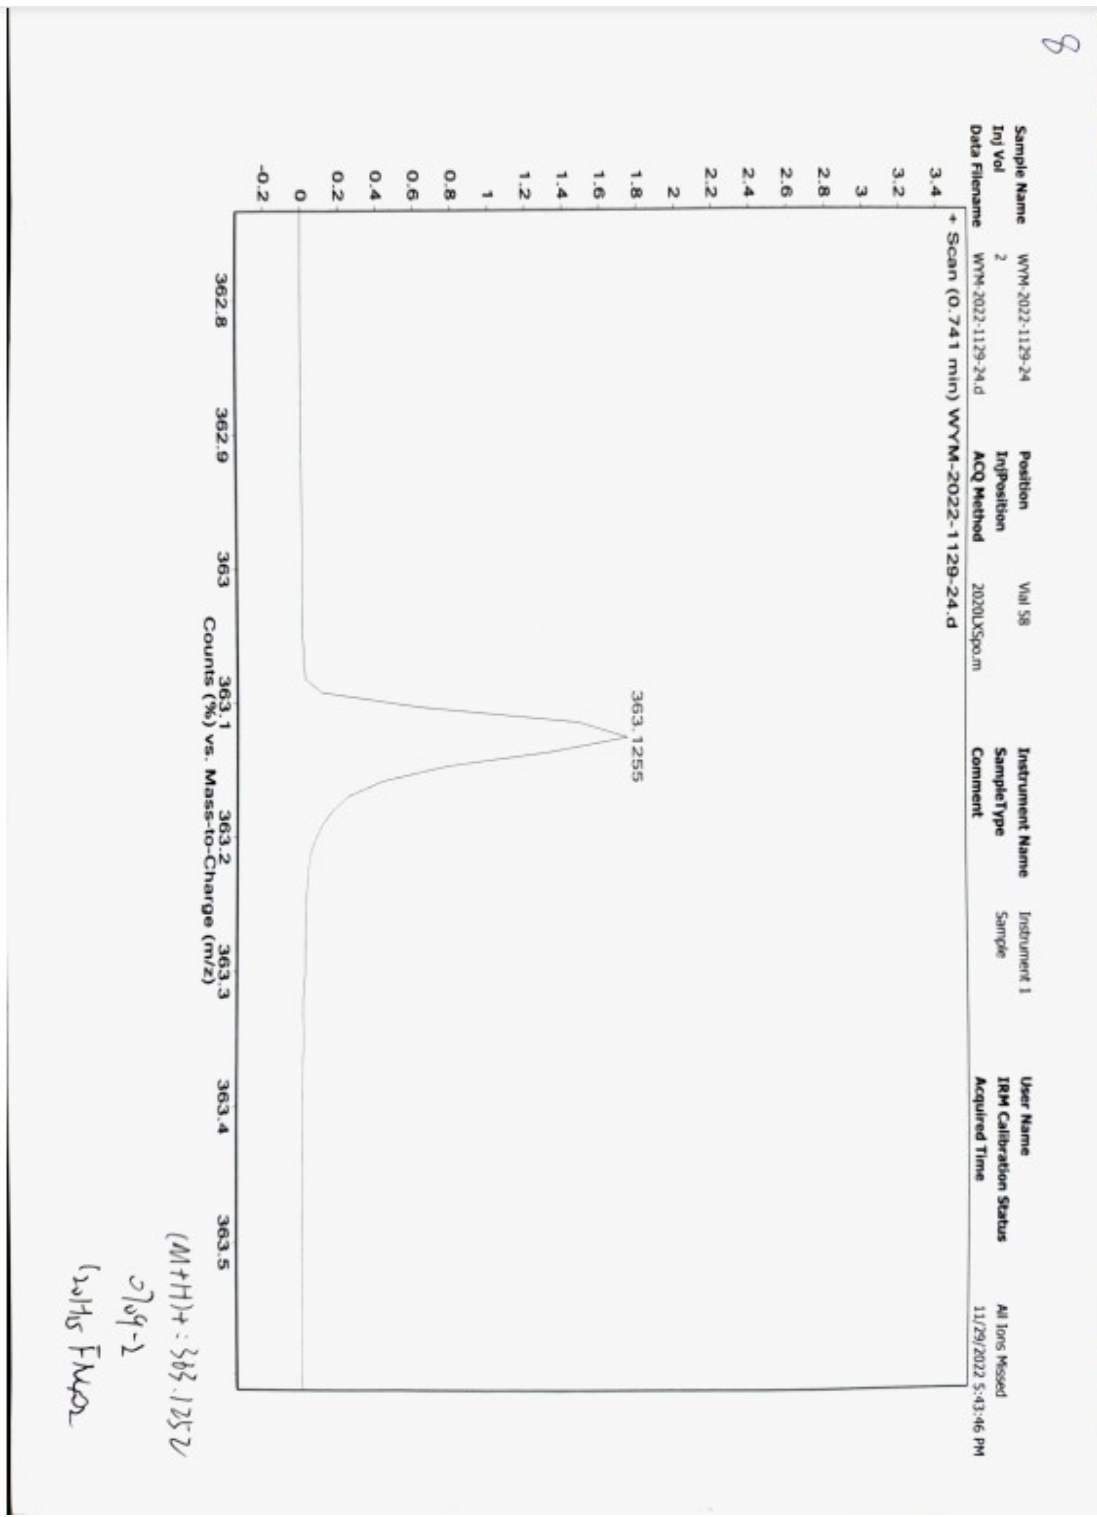

HRMS (ESI) spectrum of 22

1-(4-((1H-pyrrolo[2,3-b]pyridin-5-yl)oxy)phenyl)-3-(2-chlorophenyl)urea (**23**)

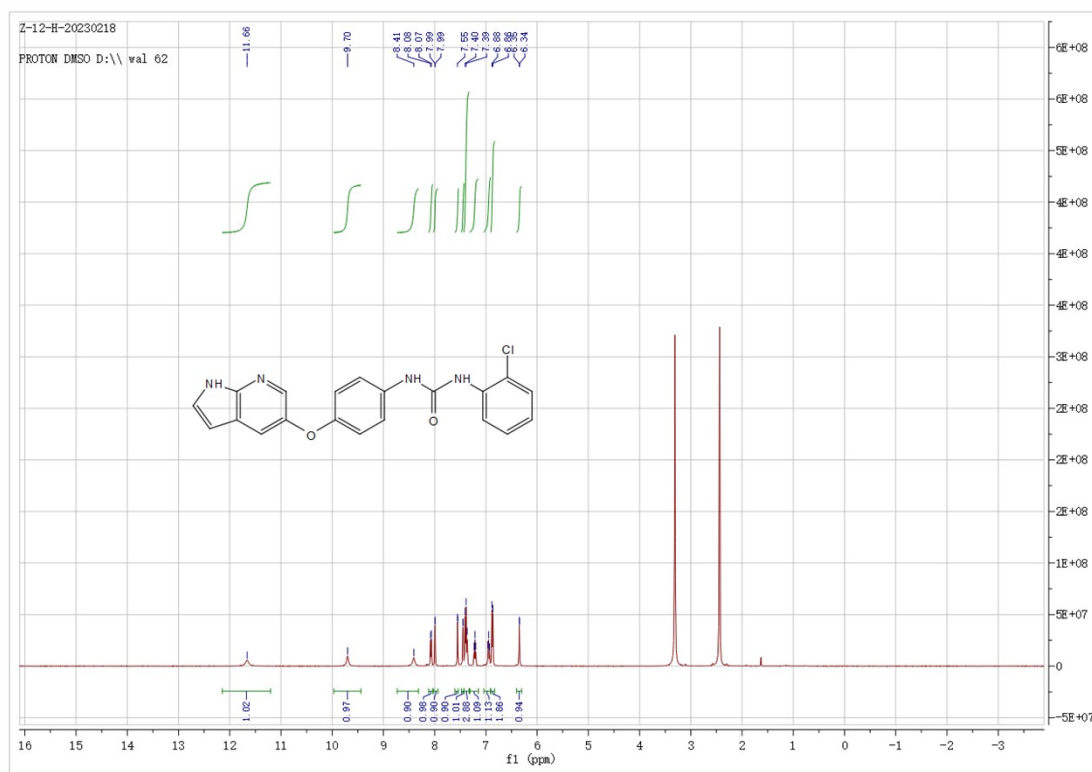

$^1\text{H}$  NMR spectrum of **23**

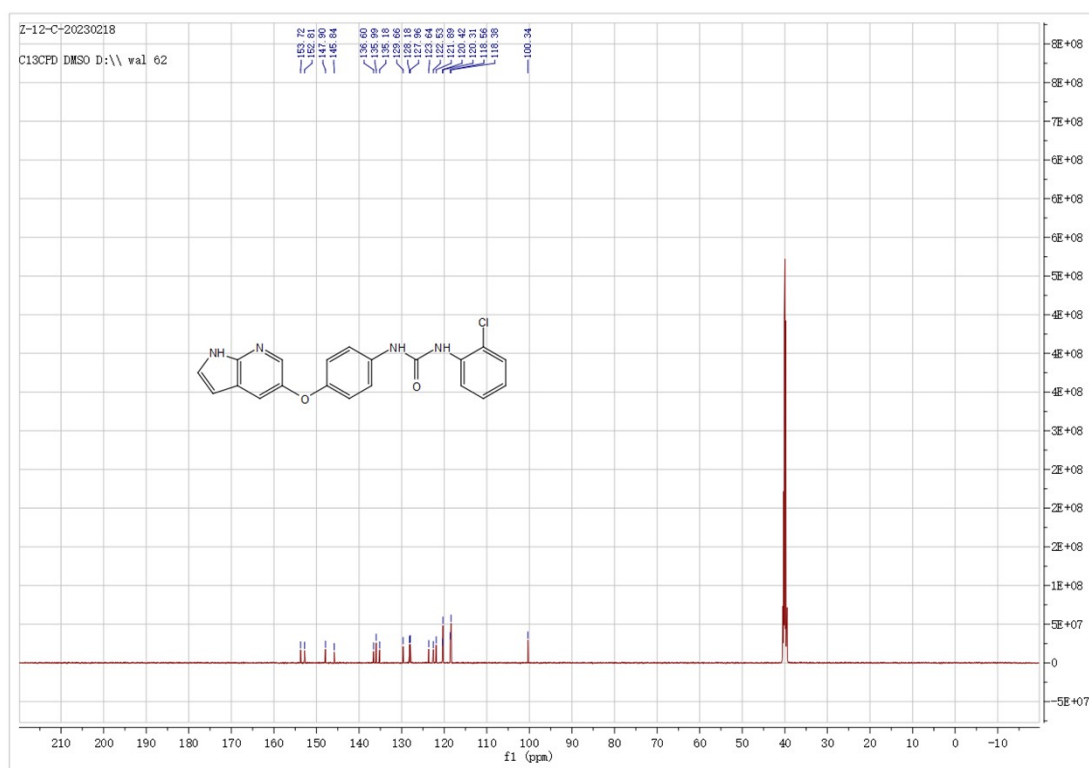

$^{13}\text{C}$  NMR spectrum of **23**

2

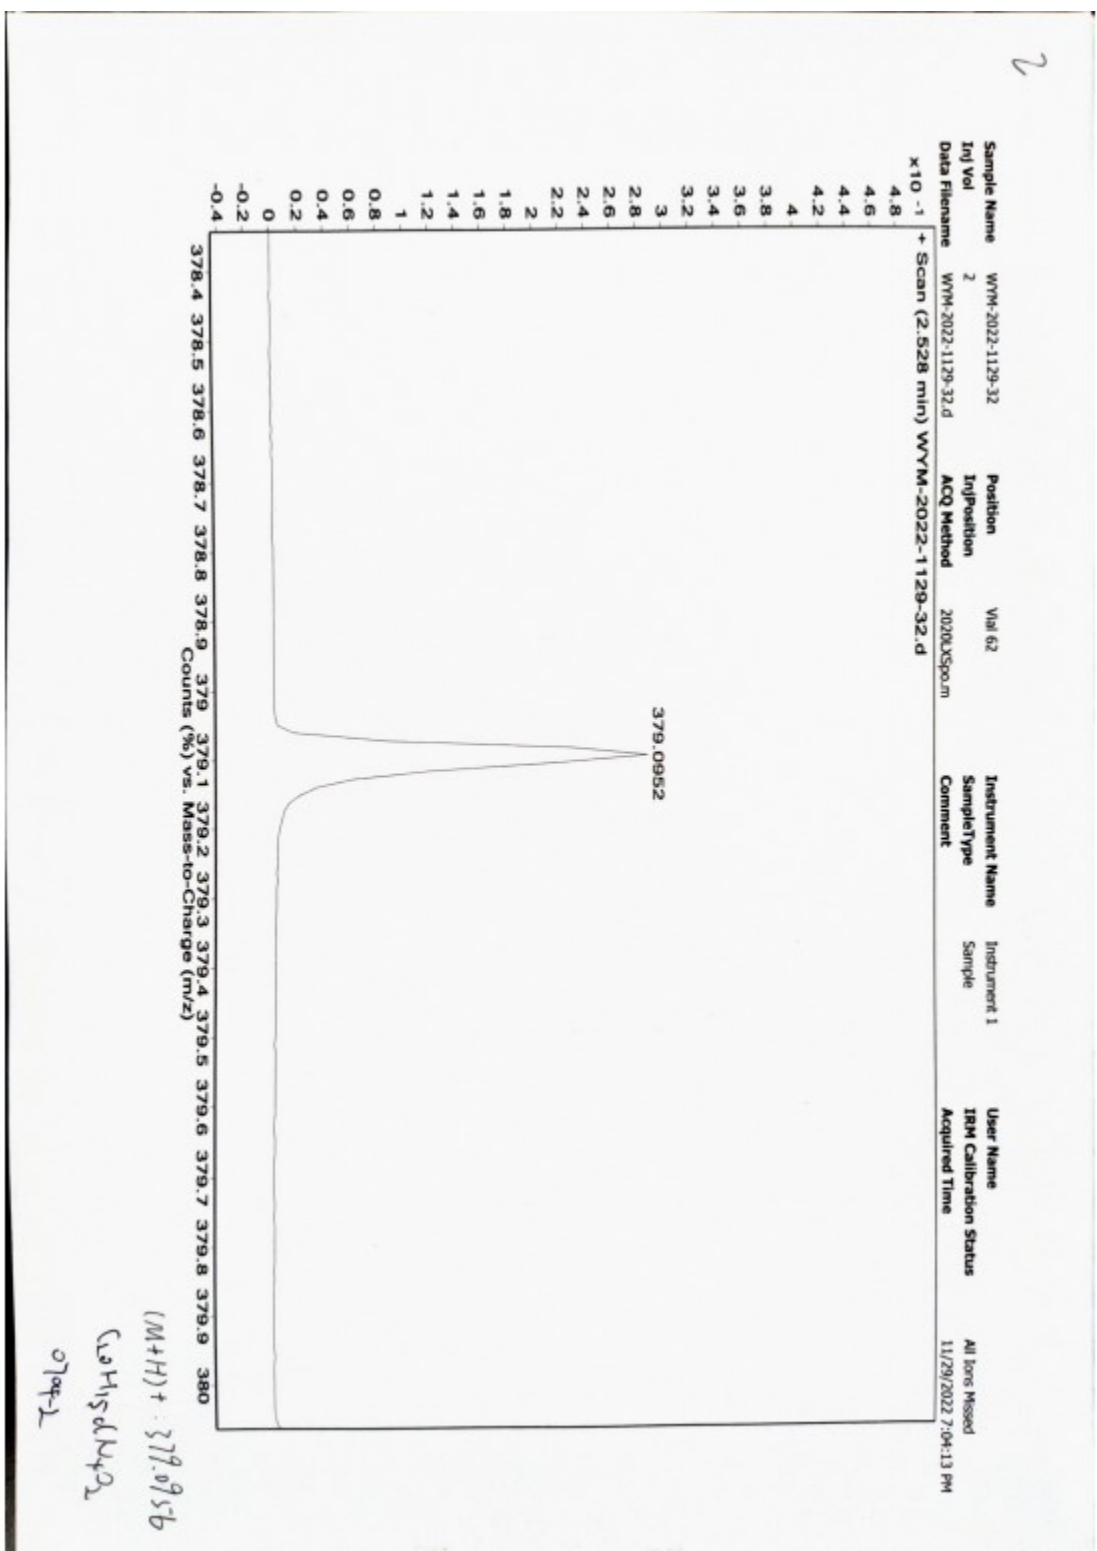

HRMS (ESI) spectrum of 23



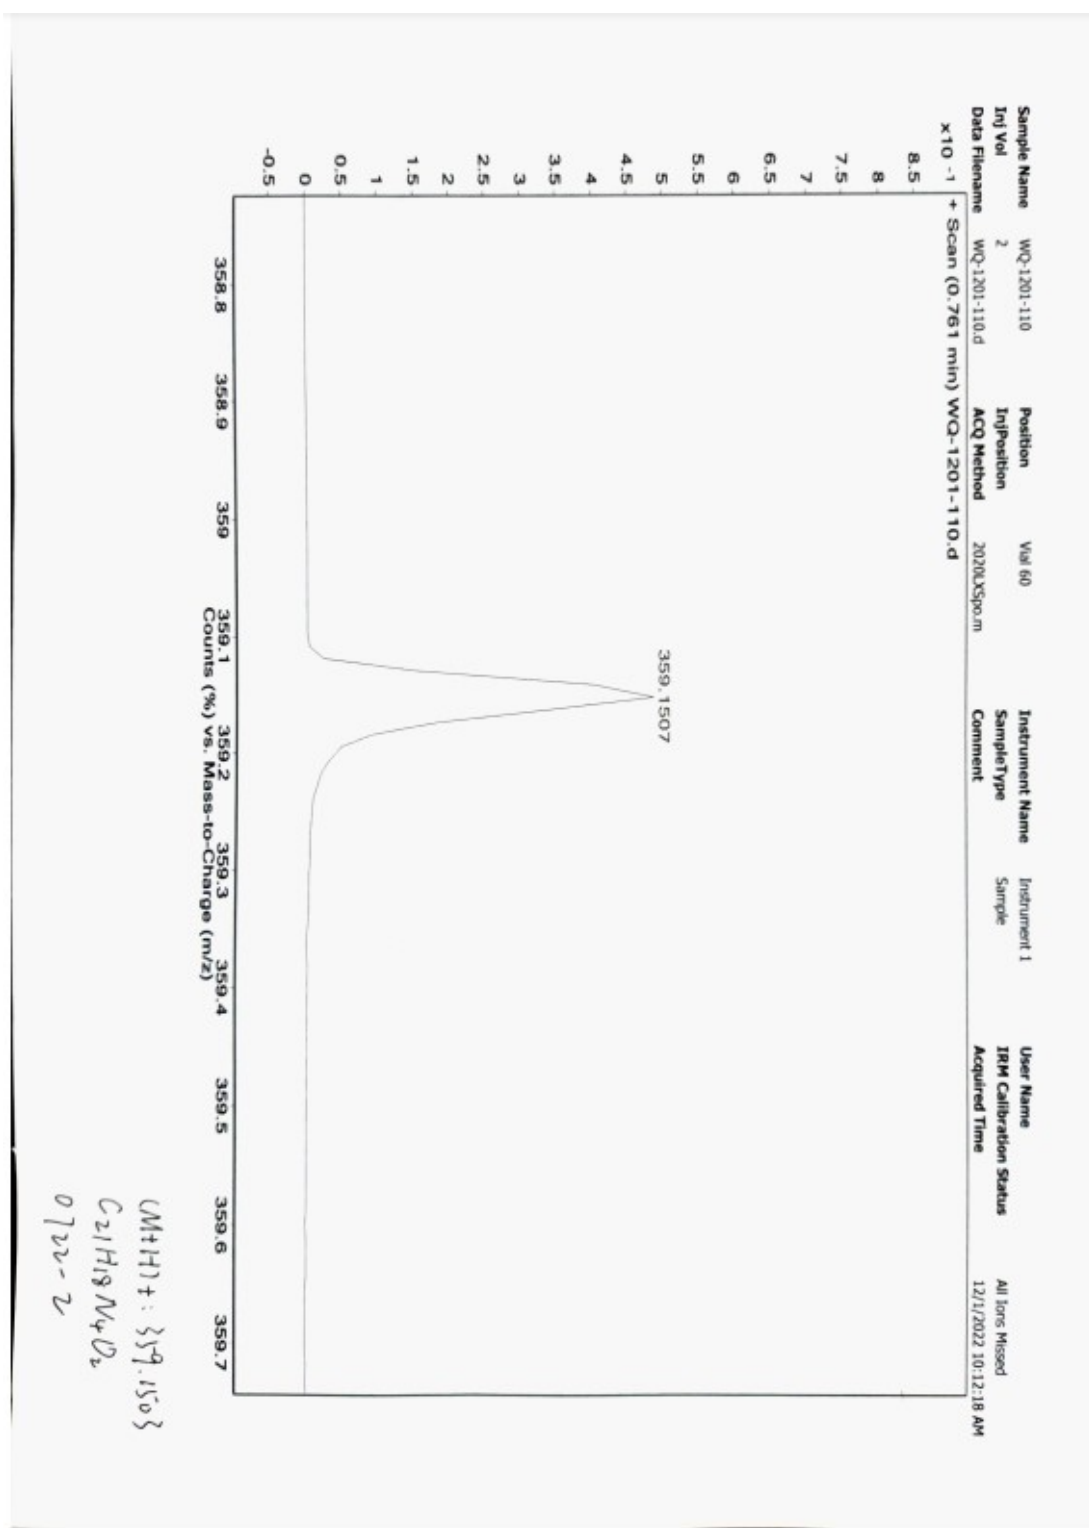

HRMS (ESI) spectrum of 24

1-(4-((1H-pyrrolo[2,3-b]pyridin-5-yl)oxy)phenyl)-3-(3-fluorophenyl)urea (**25**)

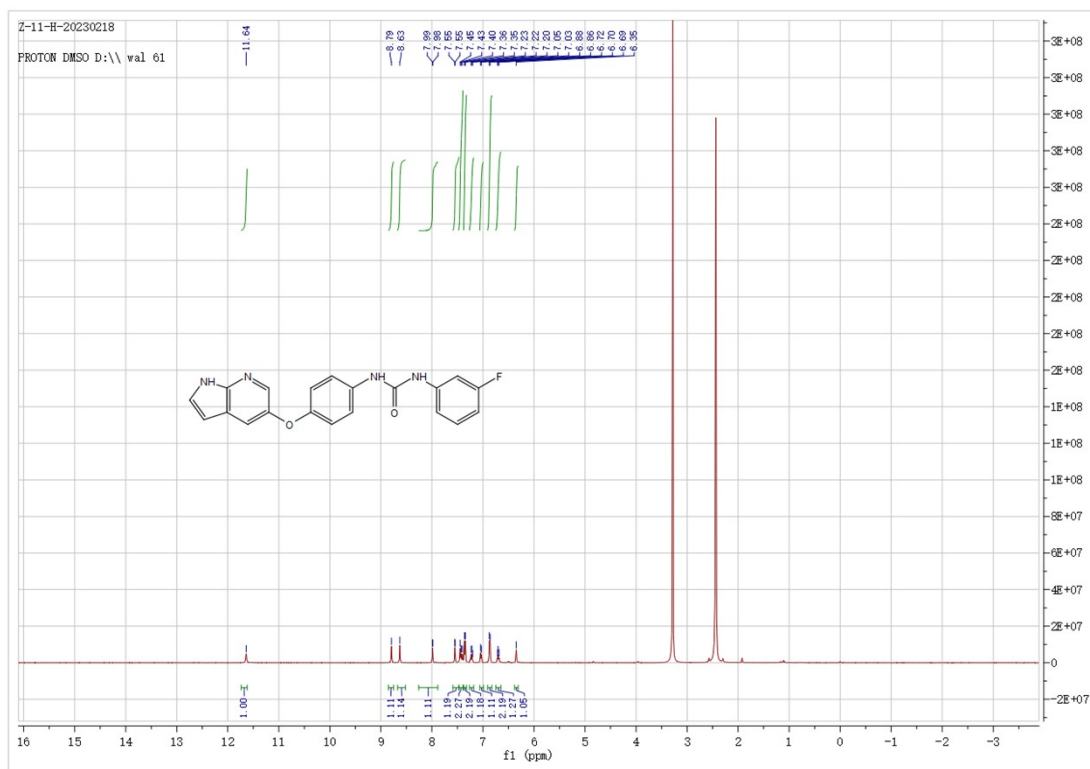

<sup>1</sup>H NMR spectrum of **25**

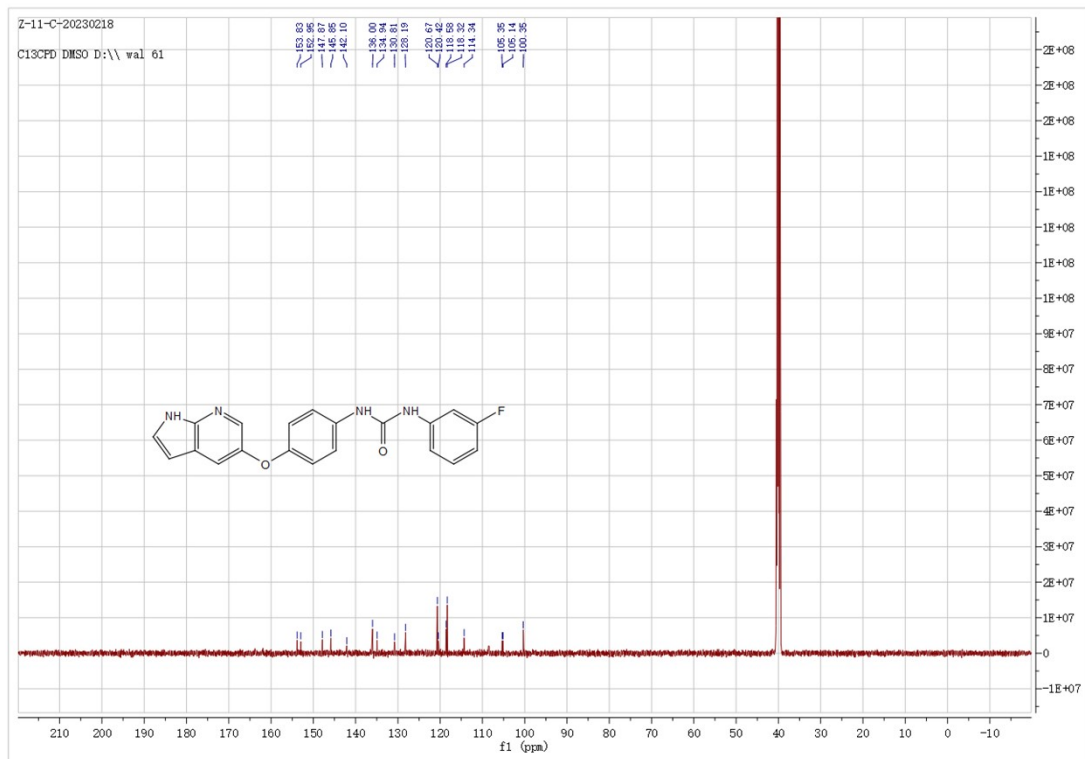

<sup>13</sup>C NMR spectrum of **25**

16

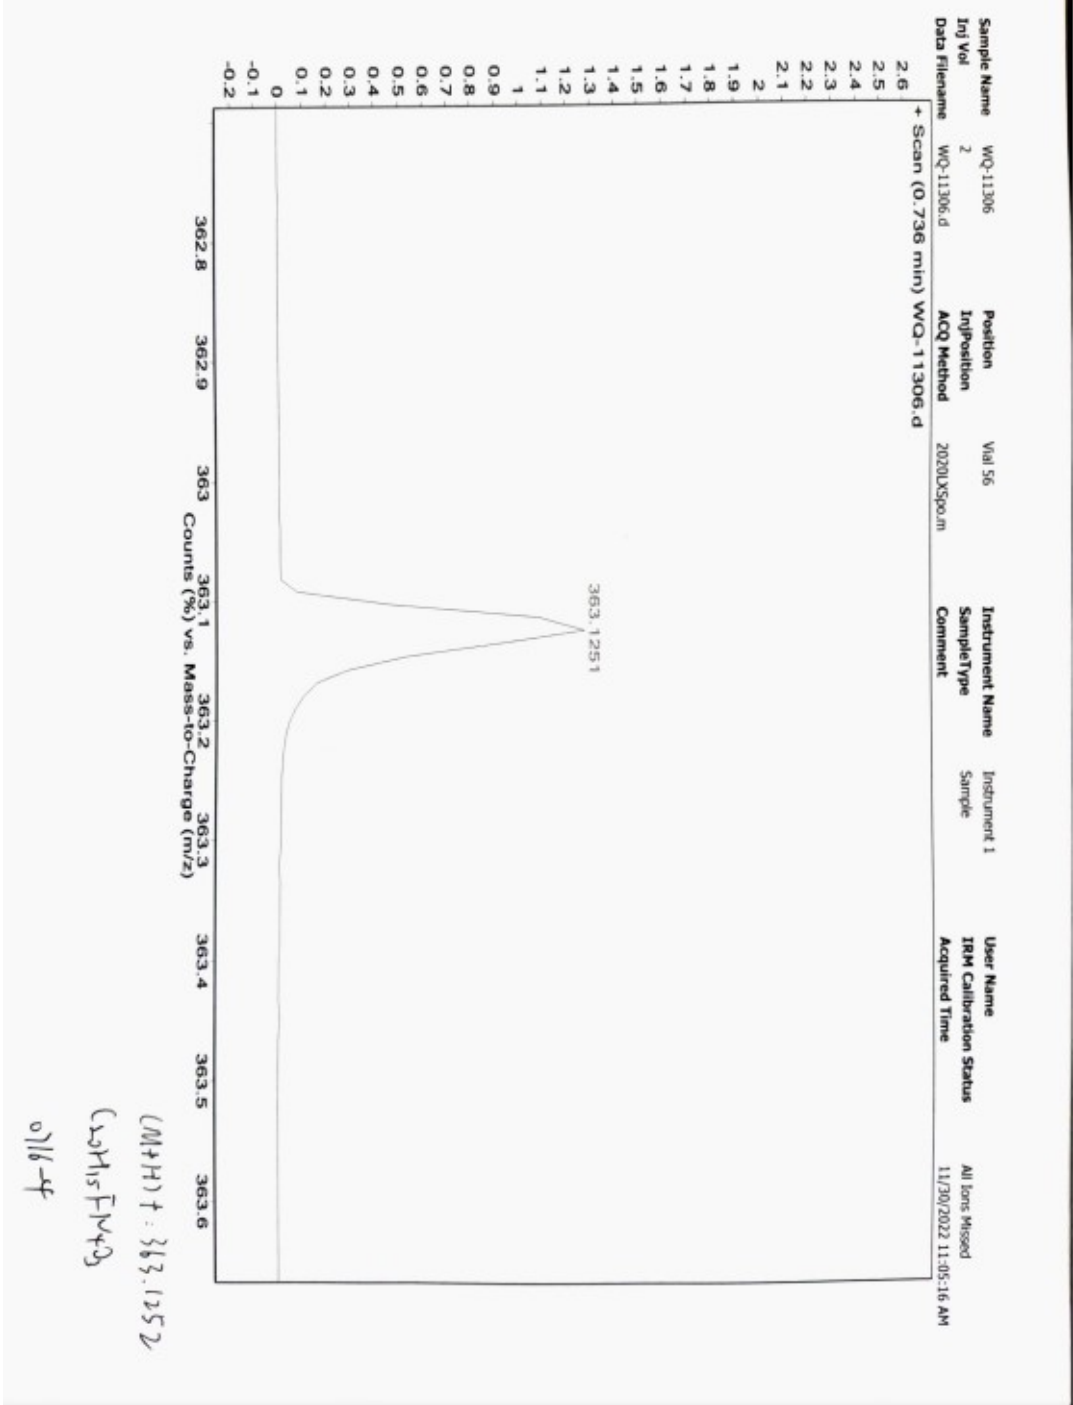

HRMS (ESI) spectrum of 25



1-(4-((1H-pyrrolo[2,3-b]pyridin-5-yl)oxy)phenyl)-3-(3-chlorophenyl)urea (**26**)

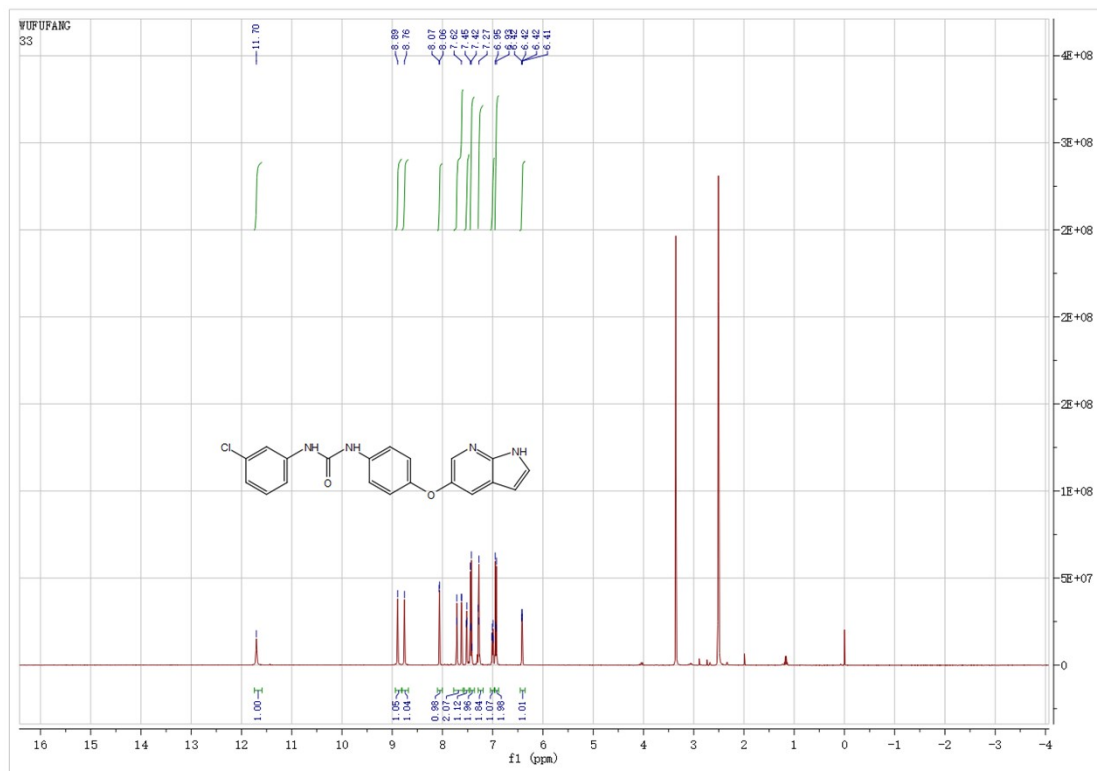

<sup>1</sup>H NMR spectrum of **26**

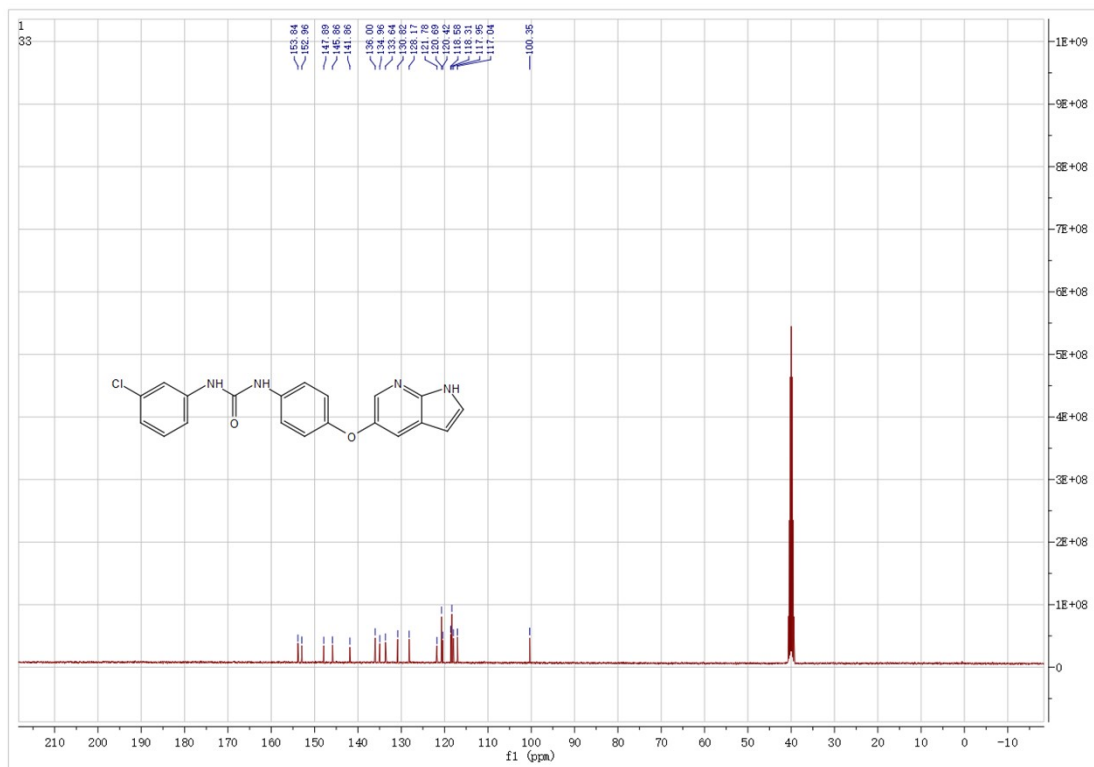

Sample Name ZXX-2022-0321-114 Vial 14 Instrument Name Instrument 1 User Name  
 Inj Vol 2 Inj Position Inj Position Sample Sample  
 Data Filename ZXX-2022-0321-114.d ACQ Method 2020\Xspo.m Comment All Ions Missed  
 x10 2 + Scan (2.924 min) ZXX-2022-0321-114.d Acquired Time 3/21/2022 9:26:52 PM

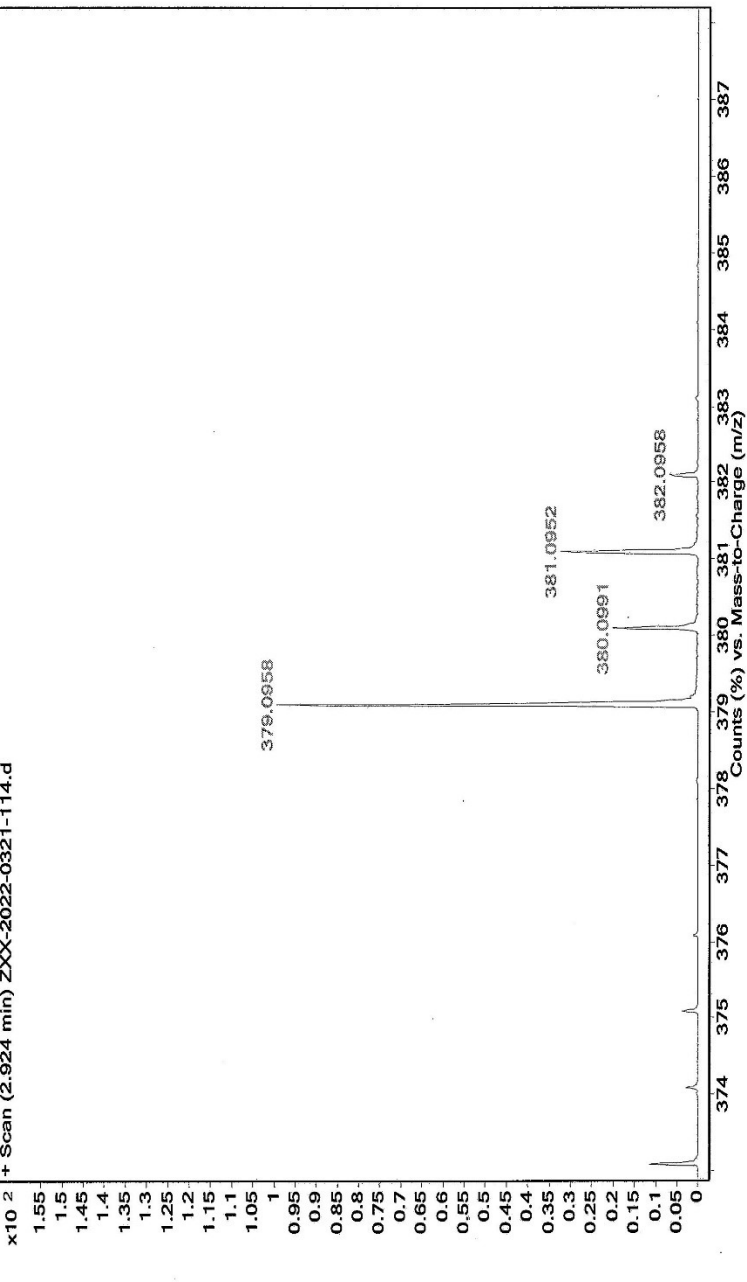

0321-2

HRMS (ESI) spectrum of 26

1-(4-((1H-pyrrolo[2,3-b]pyridin-5-yl)oxy)phenyl)-3-(3-methylphenyl)urea (**27**)

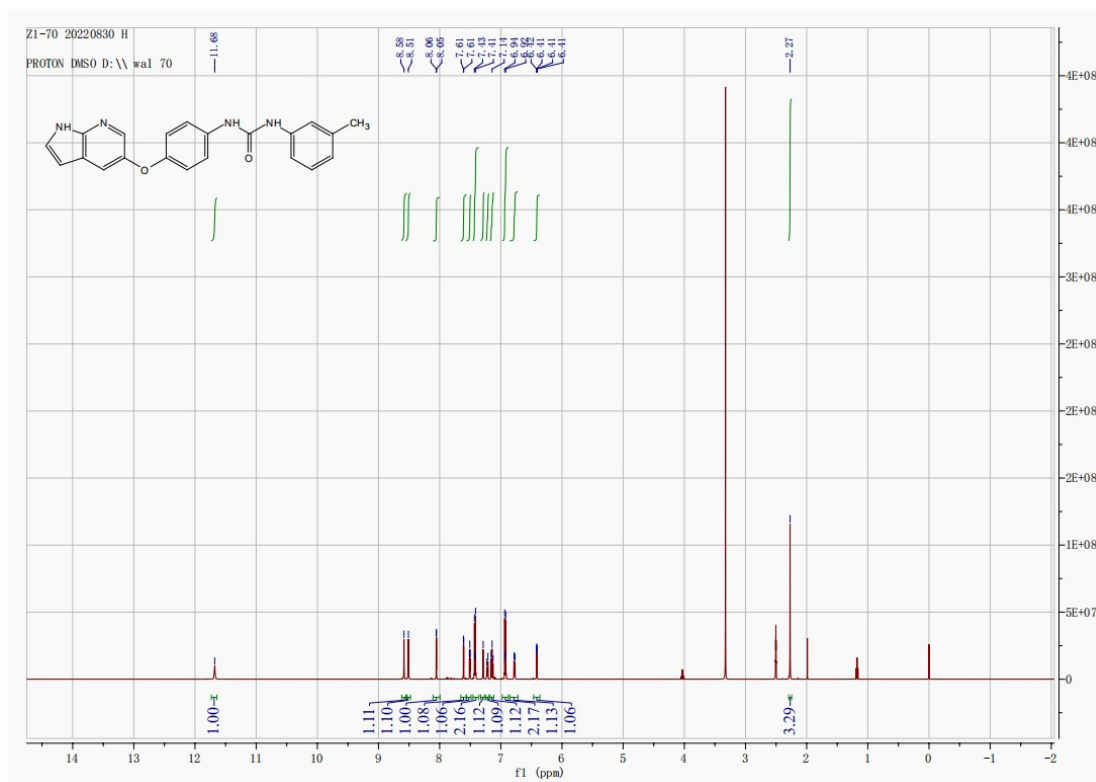

<sup>1</sup>H NMR spectrum of **27**

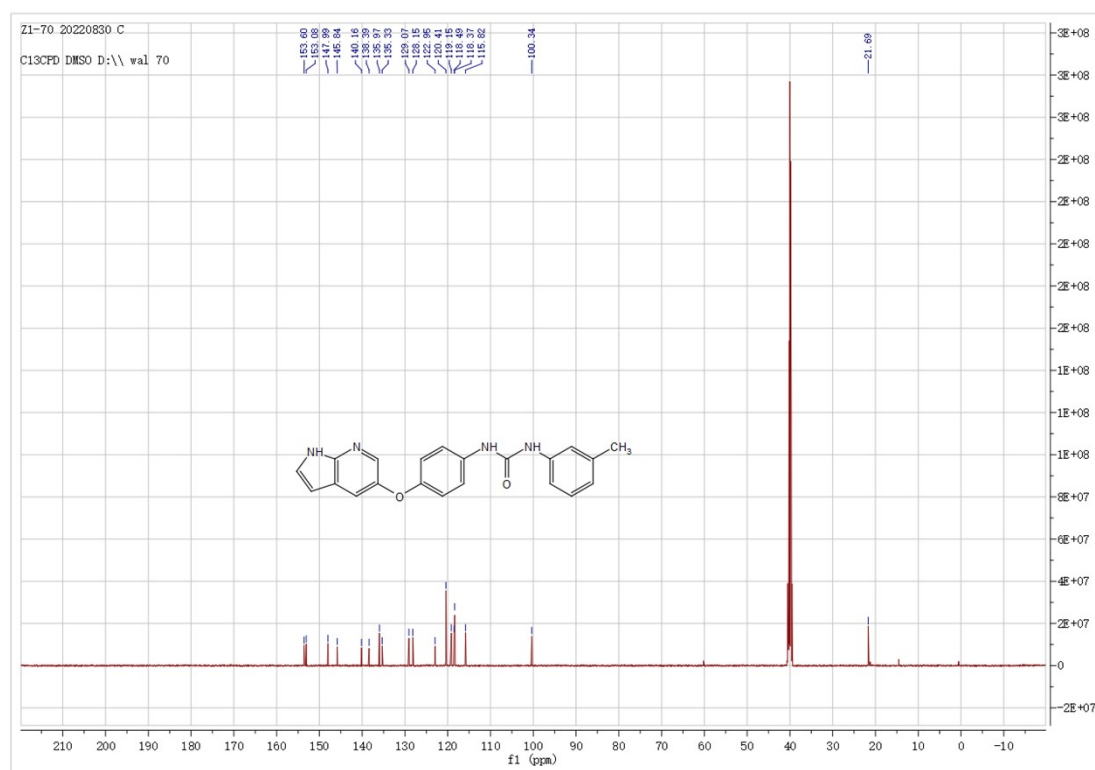

<sup>13</sup>C NMR spectrum of **27**

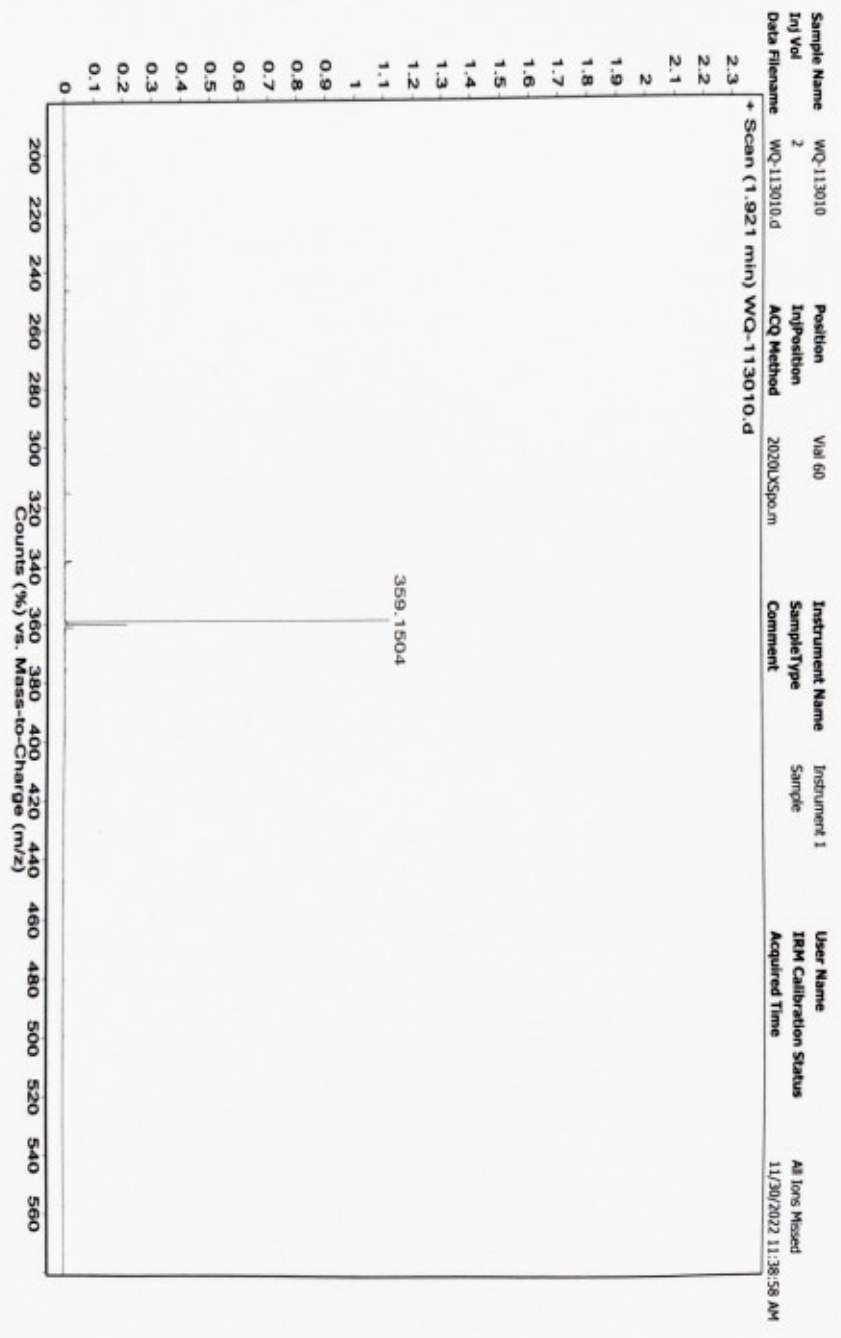

$m+1 = 359.1503$   
C<sub>21</sub>H<sub>18</sub>N<sub>4</sub>O<sub>2</sub>  
0720-1

HRMS (ESI) spectrum of 27

*1-(4-((1H-pyrrolo[2,3-b]pyridin-5-yl)oxy)phenyl)-3-(3-(trifluoromethyl)phenyl)urea*  
**(28)**

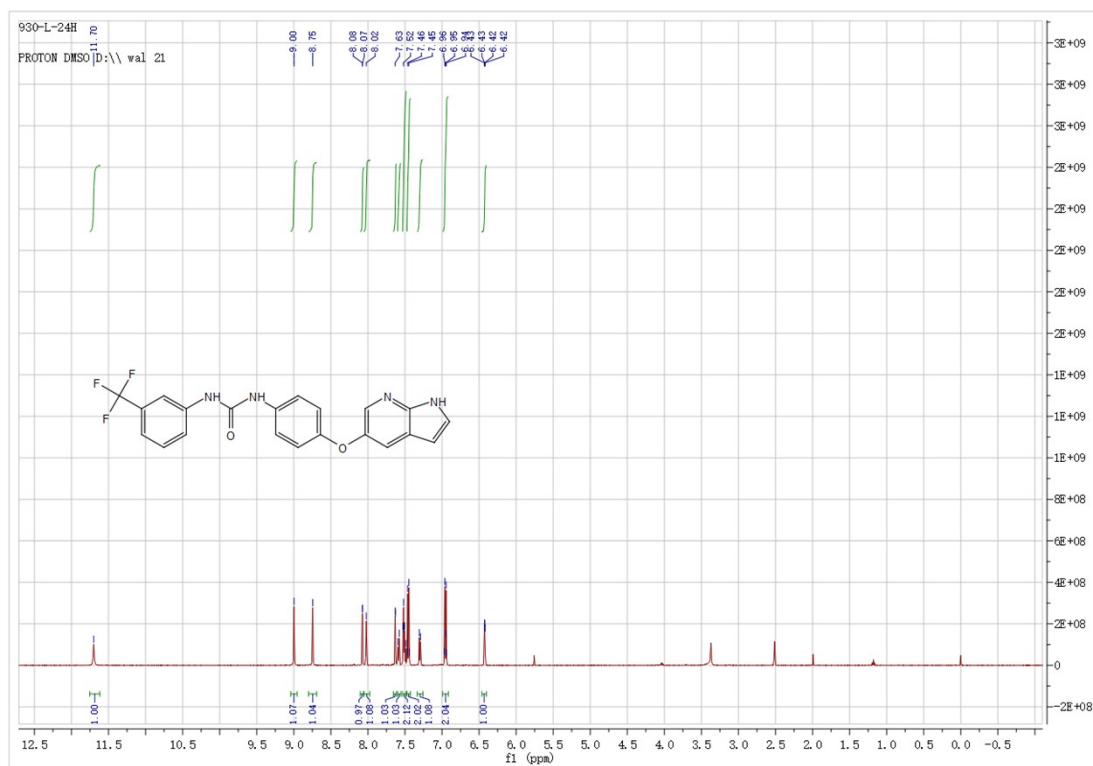

<sup>1</sup>H NMR spectrum of **28**

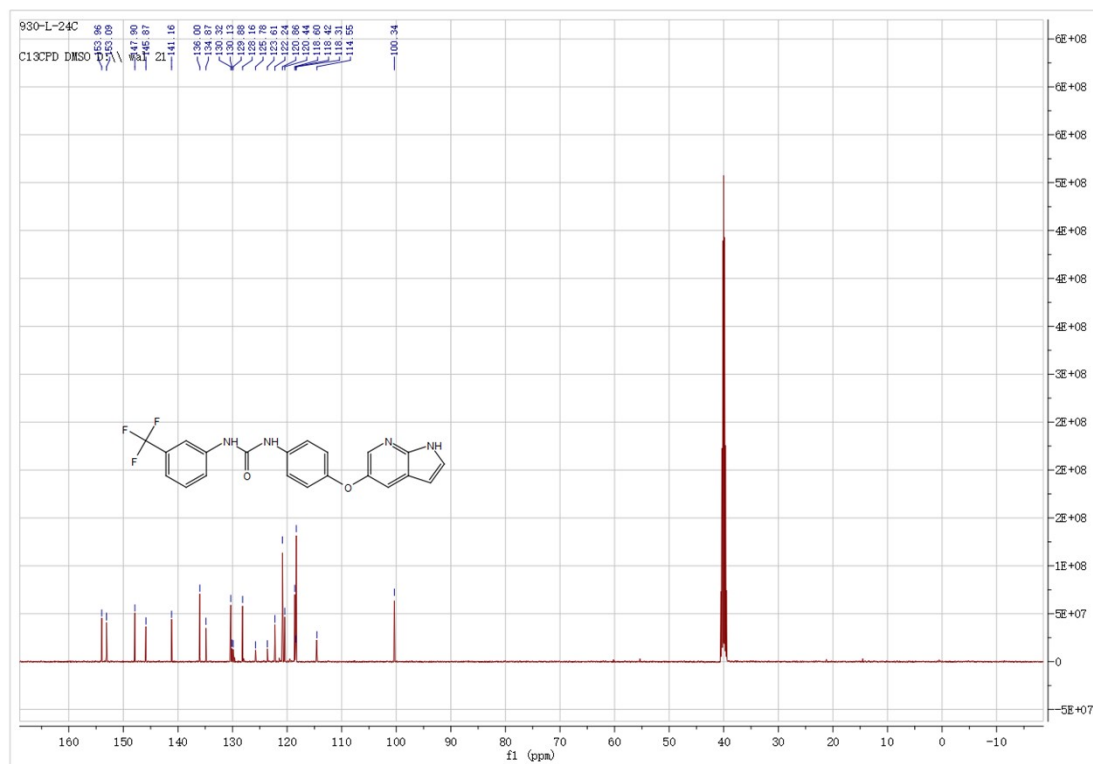

<sup>13</sup>C NMR spectrum of **28**

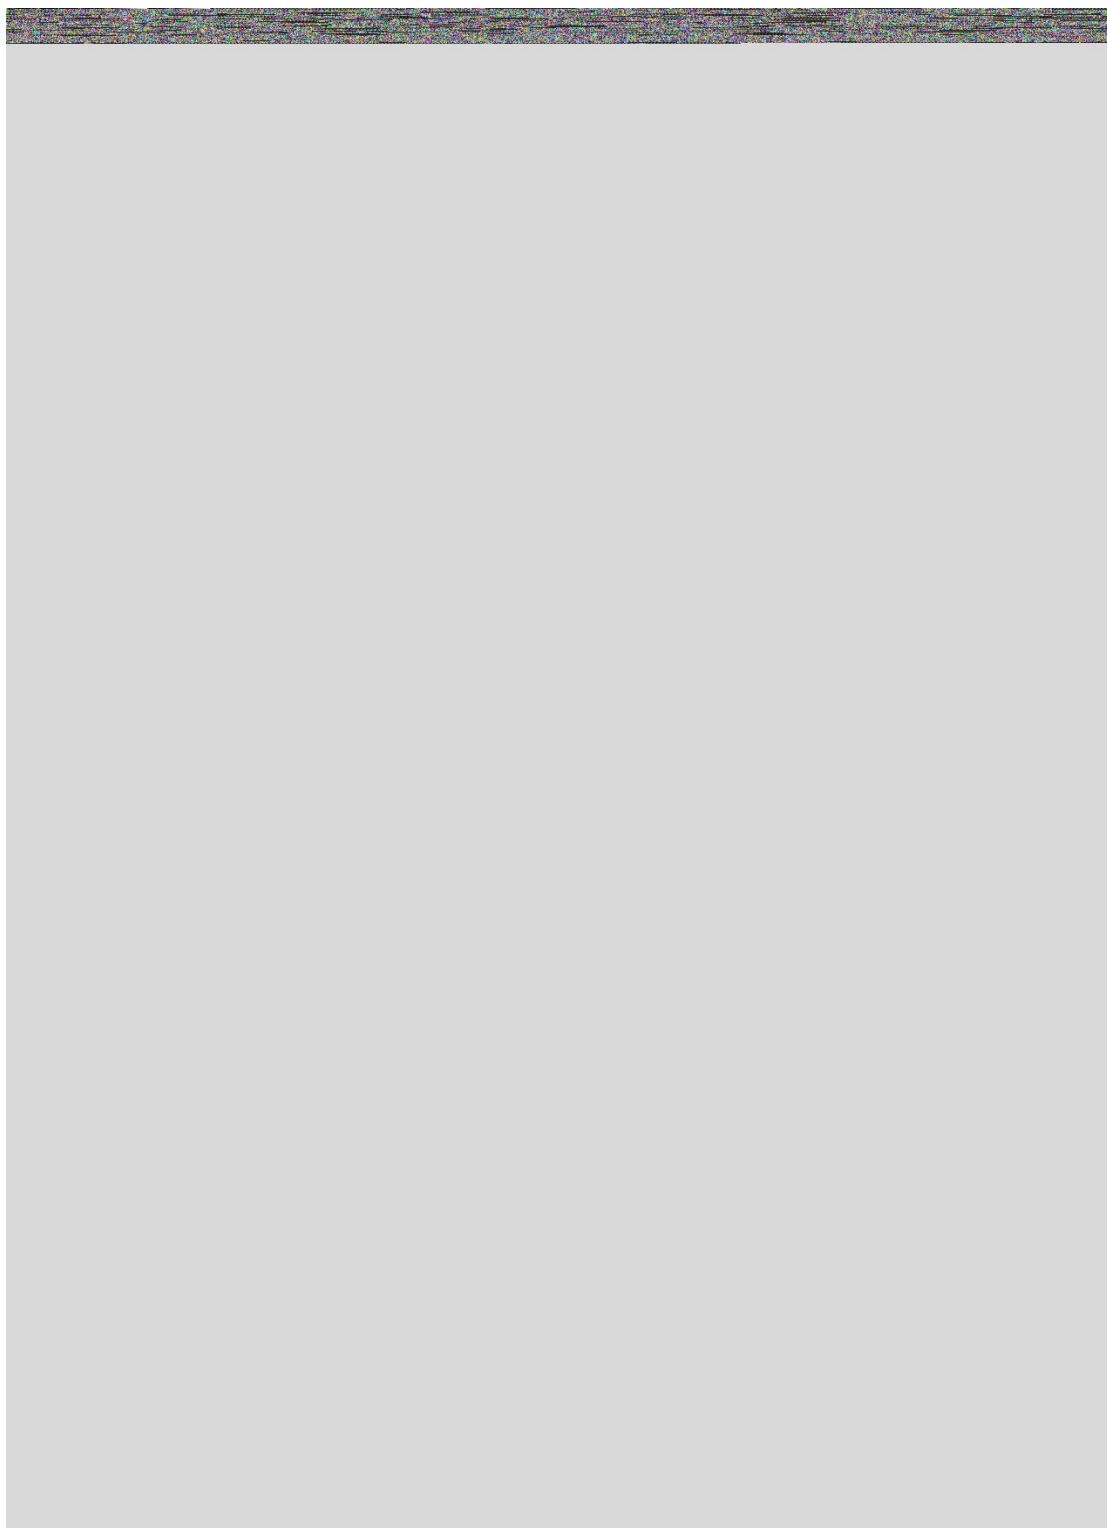

HRMS (ESI) spectrum of **28**



Sample Name  
Inj Vol  
Data Filename  
Position  
InjPosition  
ACQ Method  
Instrument Name  
SampleType  
Comment  
User Name  
IRM Calibration Status  
Acquired Time

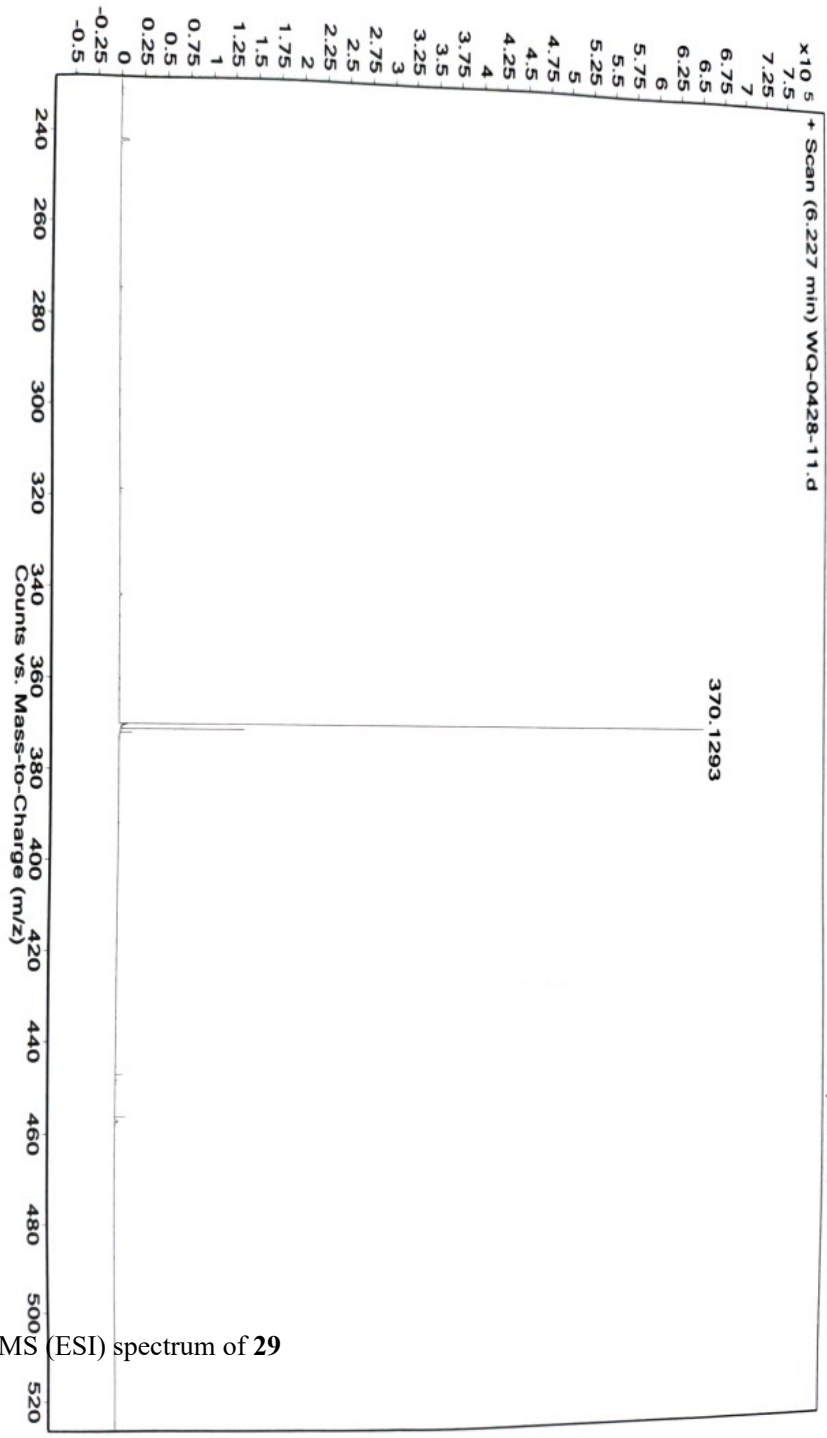

HRMS (ESI) spectrum of 29

370.1293  
1734: C<sub>14</sub>H<sub>15</sub>O<sub>2</sub>N<sub>5</sub>  
1734: 370.1299



*1-(4-((1H-pyrrolo[2,3-b]pyridin-5-yl)oxy)phenyl)-3-(3-methoxyphenyl)urea (30)*

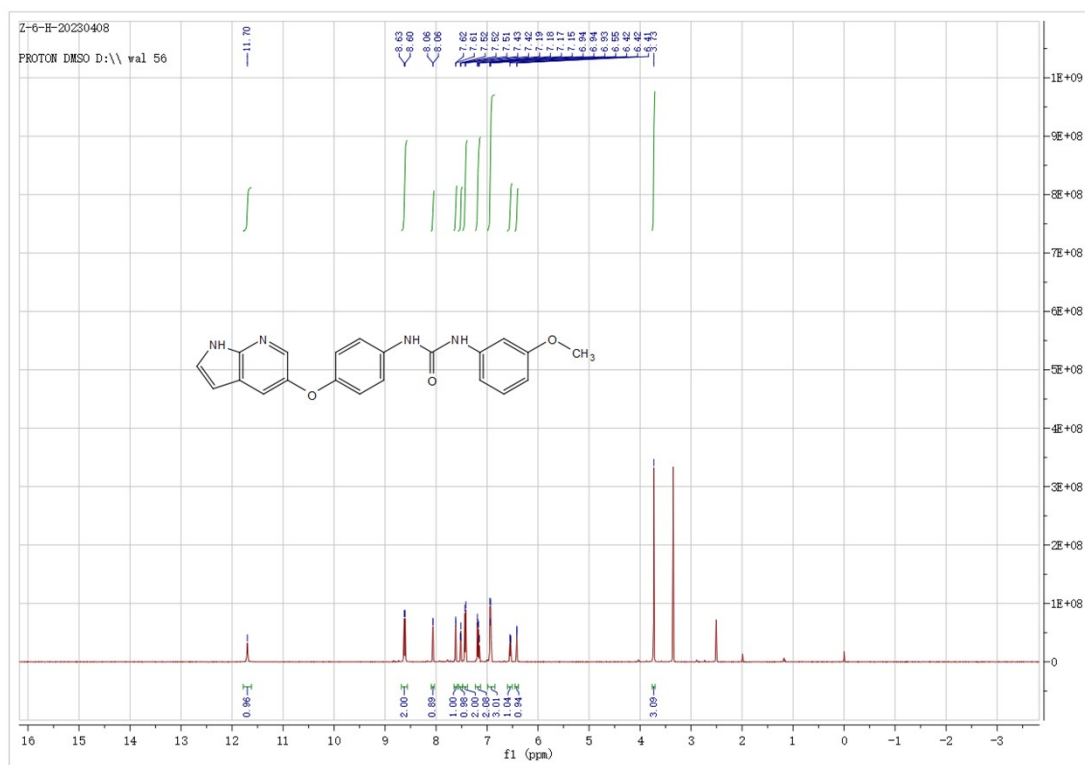

$^1\text{H}$  NMR spectrum of **30**

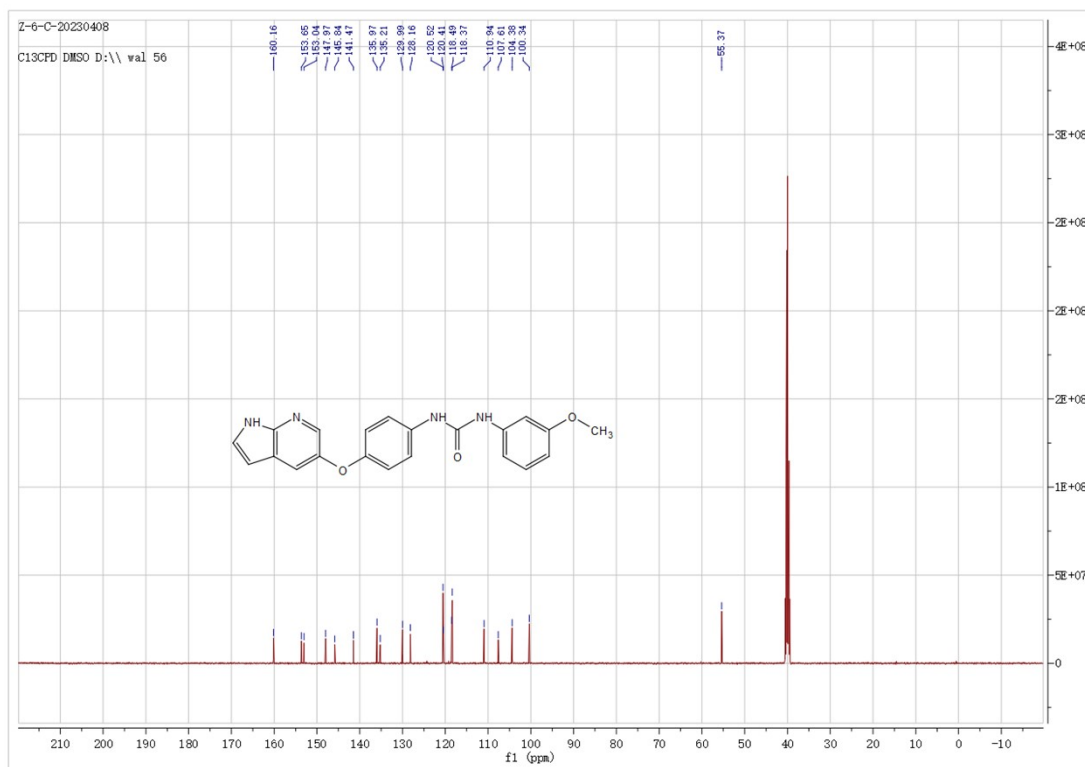

$^{13}\text{C}$  NMR spectrum of **30**

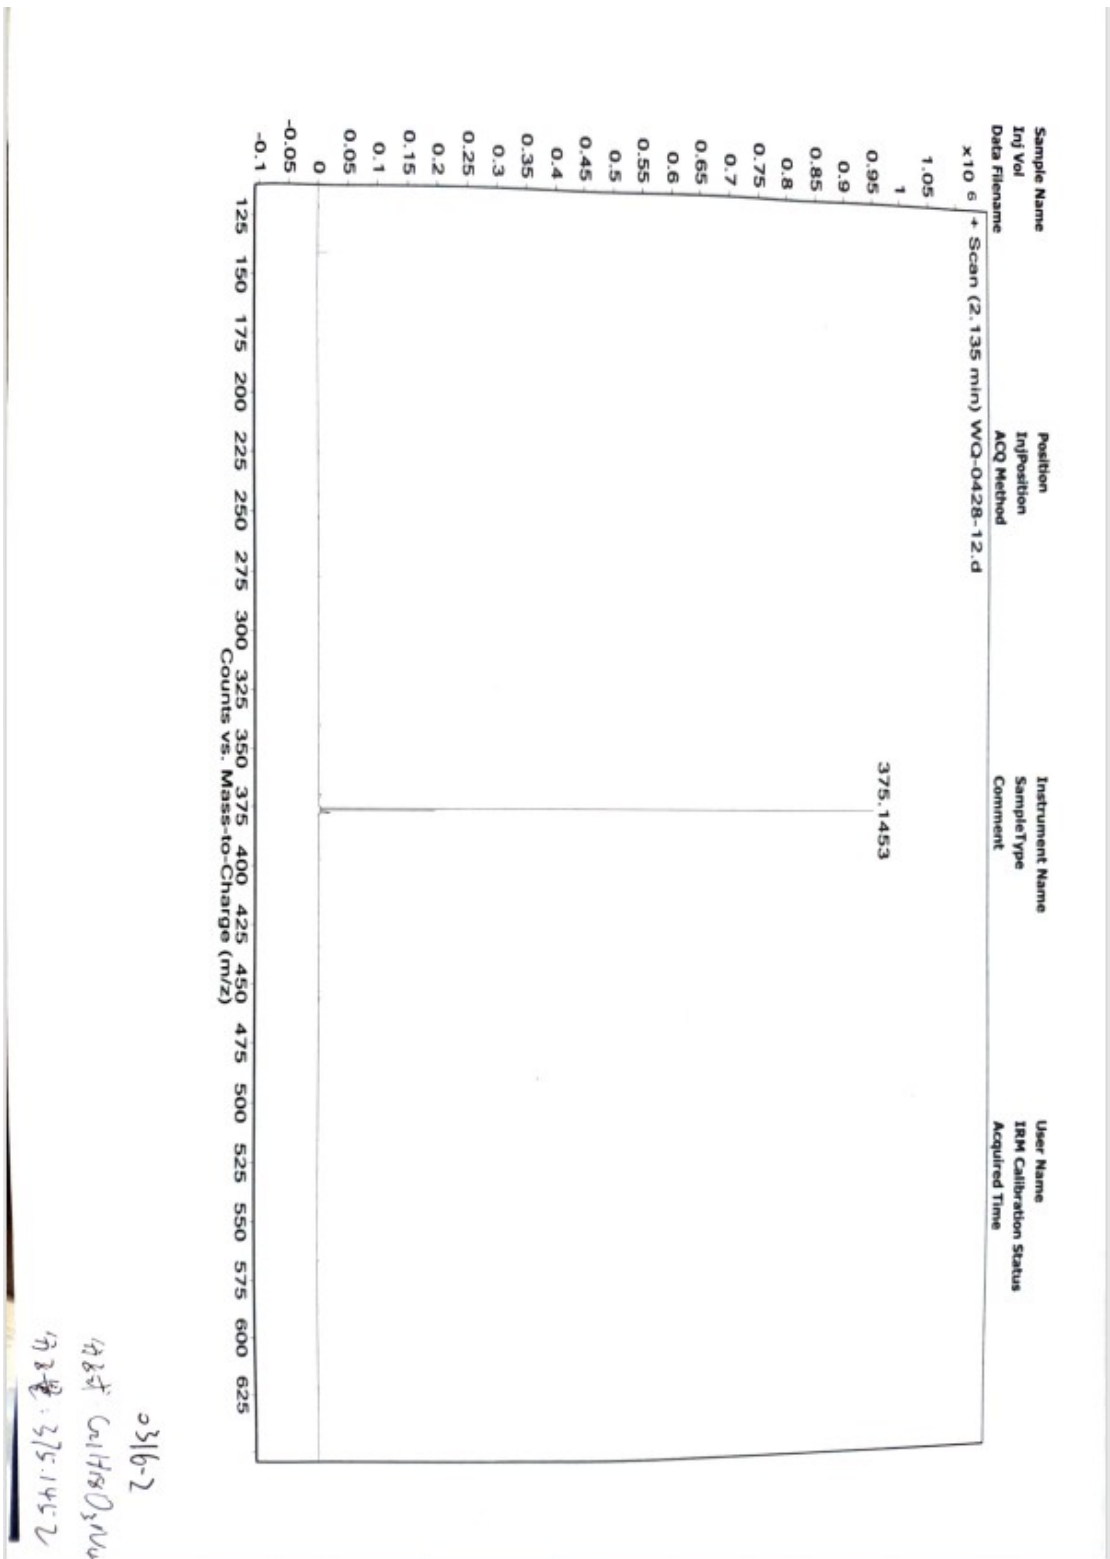

HRMS (ESI) spectrum of 30

1-(4-((1H-pyrrolo[2,3-b]pyridin-5-yl)oxy)phenyl)-3-(4-fluorophenyl)urea (**31**)

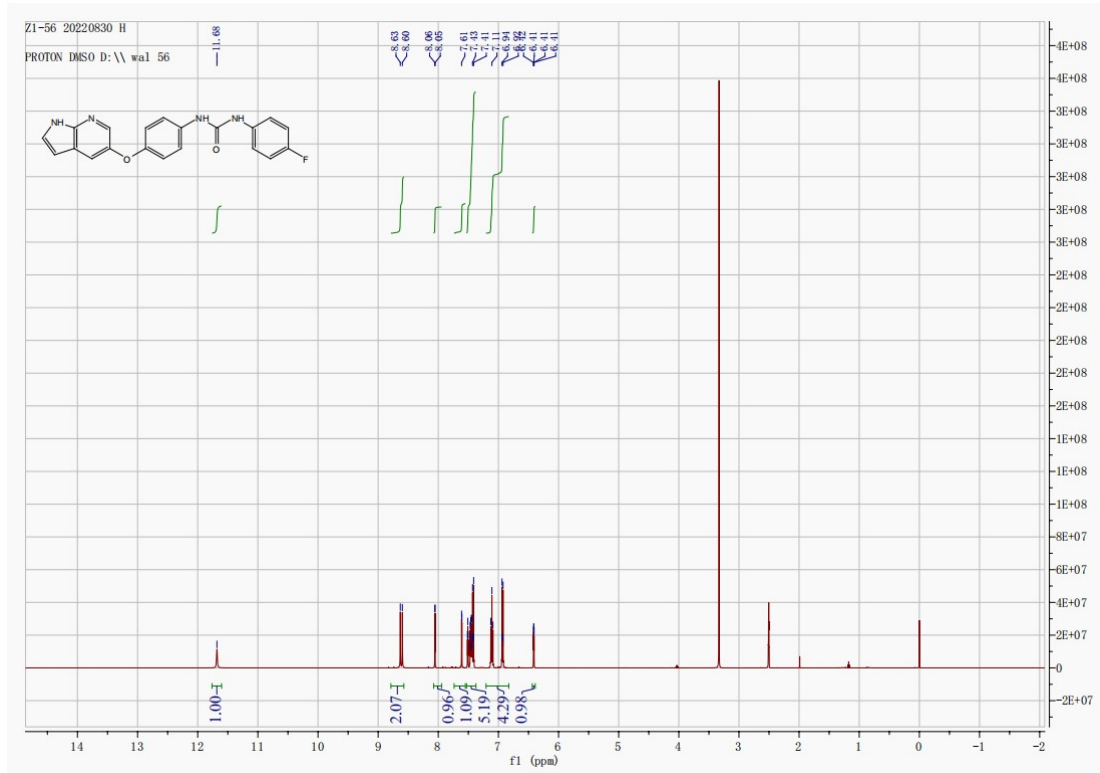

<sup>1</sup>H NMR spectrum of **31**

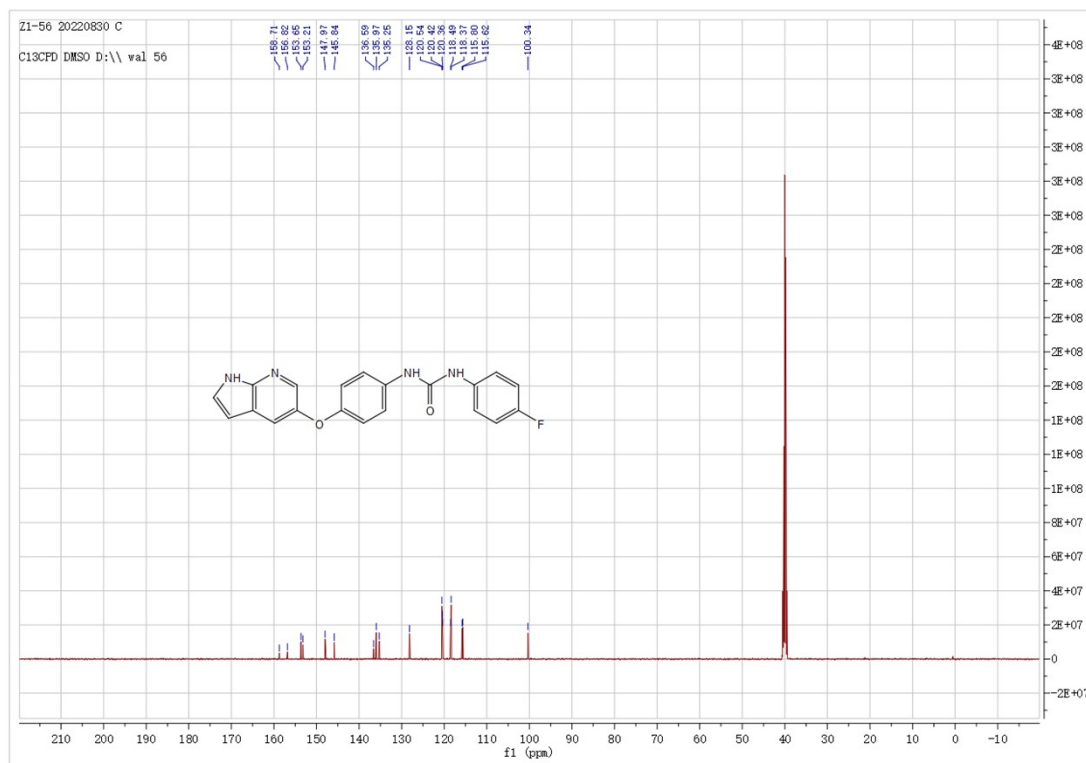

<sup>13</sup>C NMR spectrum of **31**

6

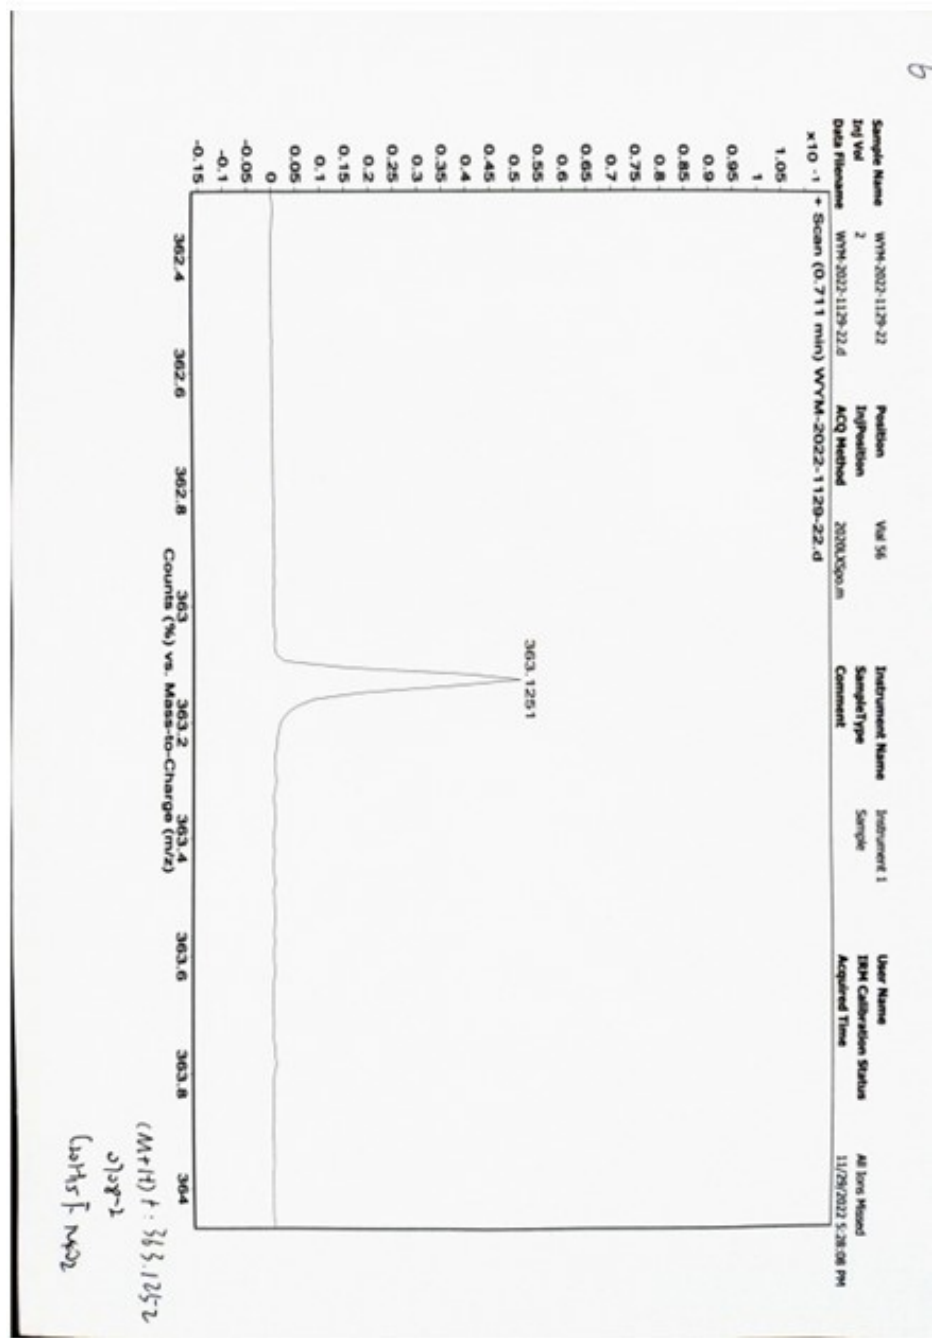

HRMS (ESI) spectrum of 31

1-(4-((1H-pyrrolo[2,3-b]pyridin-5-yl)oxy)phenyl)-3-(4-chlorophenyl)urea (32)

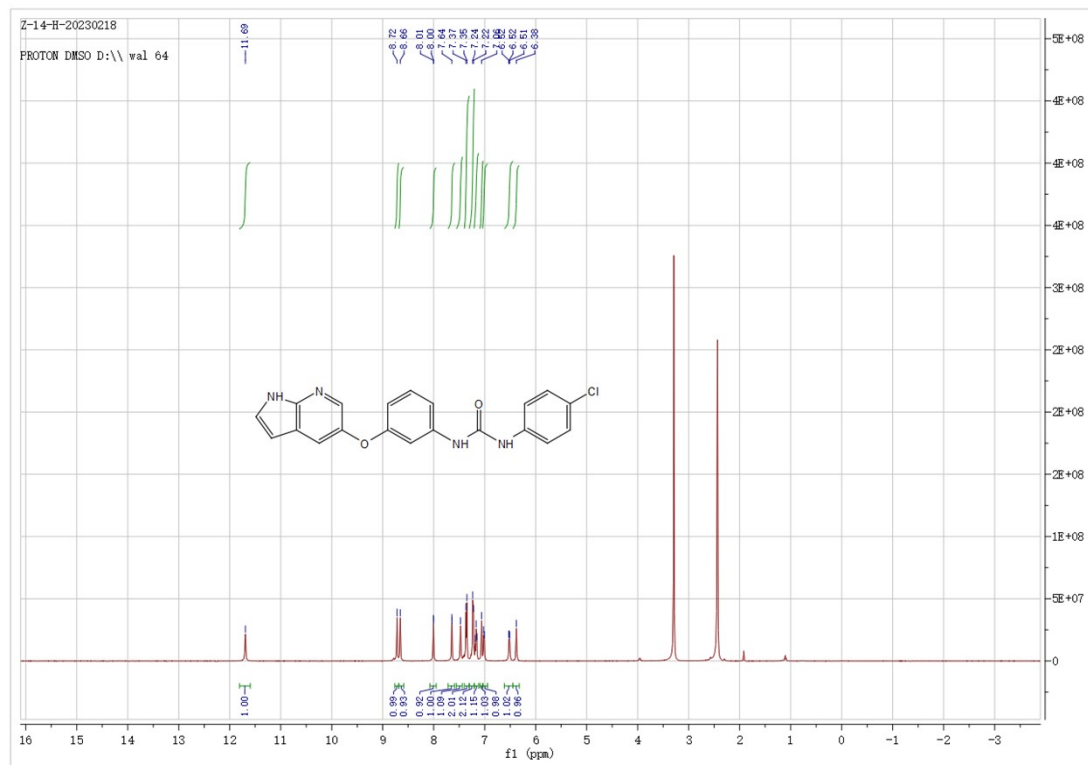

<sup>1</sup>H NMR spectrum of 32

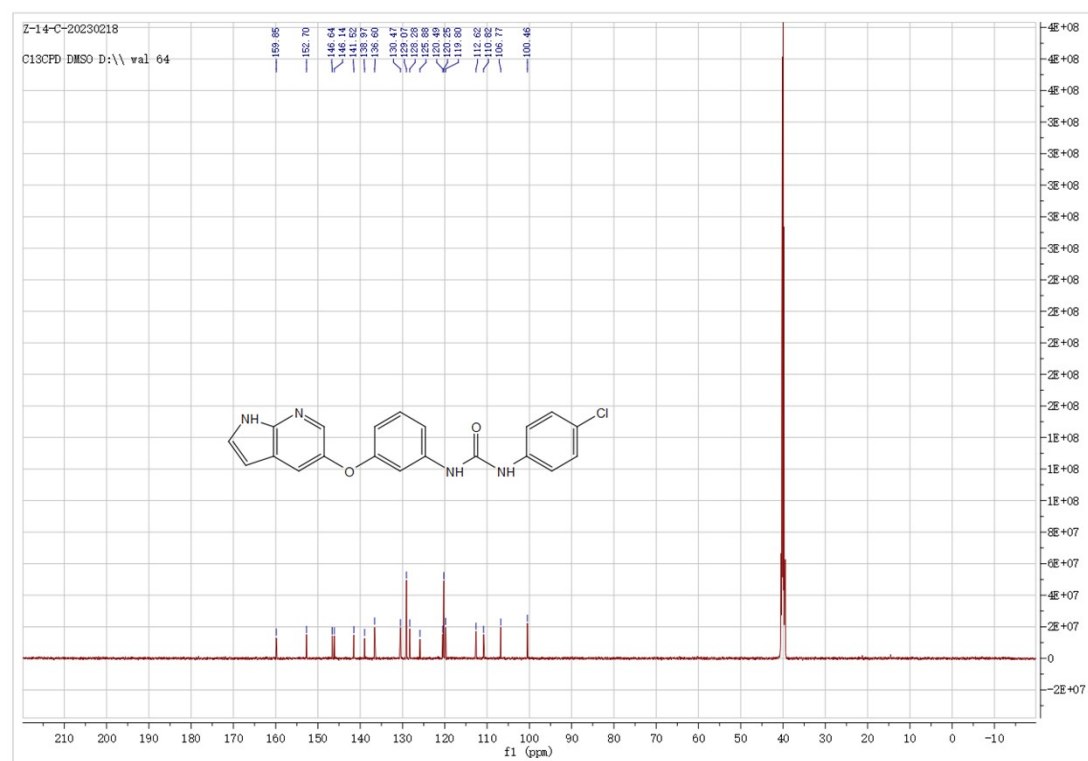

<sup>13</sup>C NMR spectrum of 32

32

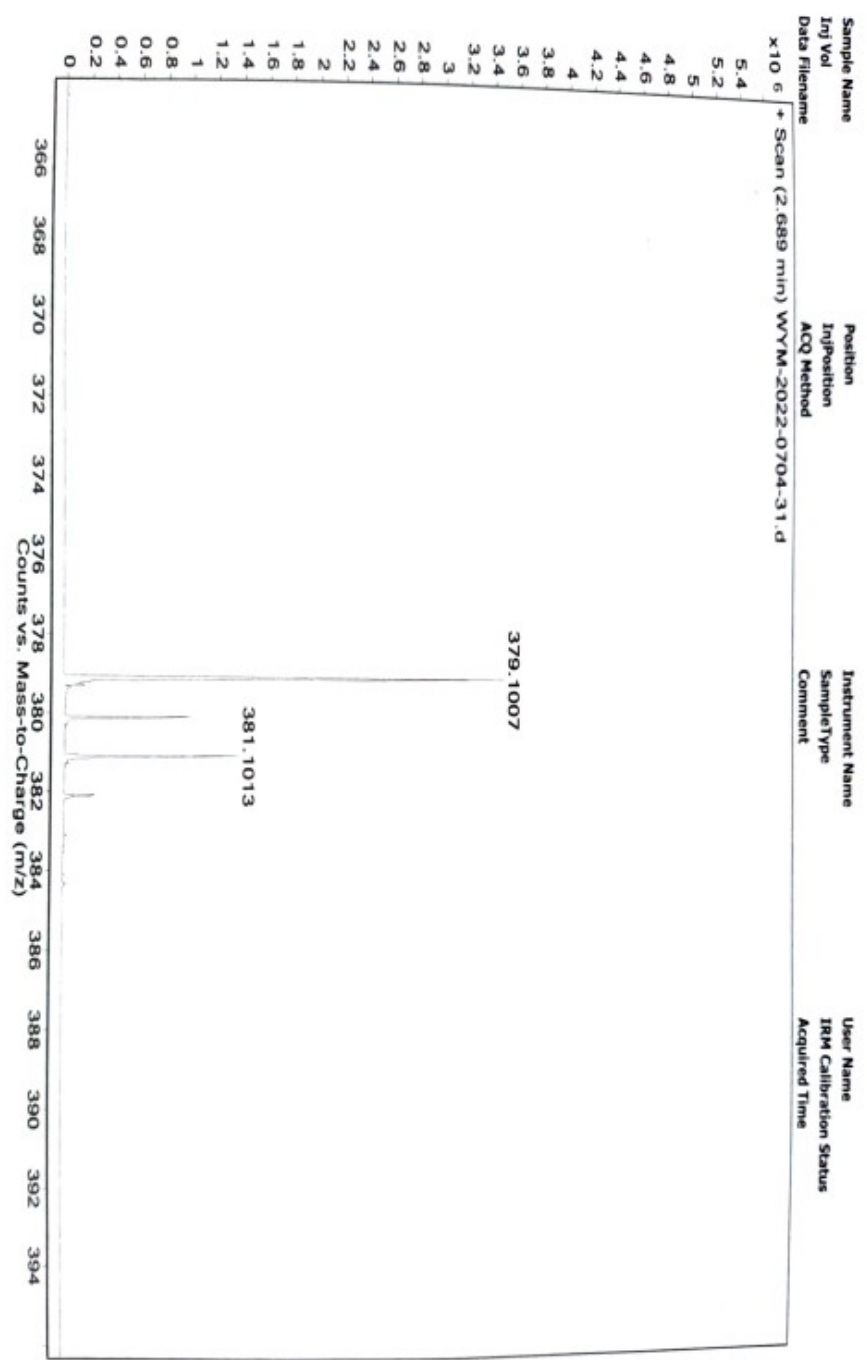

0724-1  
20211217.0956

HRMS (ESI) spectrum of 32

*1-(4-((1H-pyrrolo[2,3-b]pyridin-5-yl)oxy)phenyl)-3-(4-methylphenyl)urea (33)*

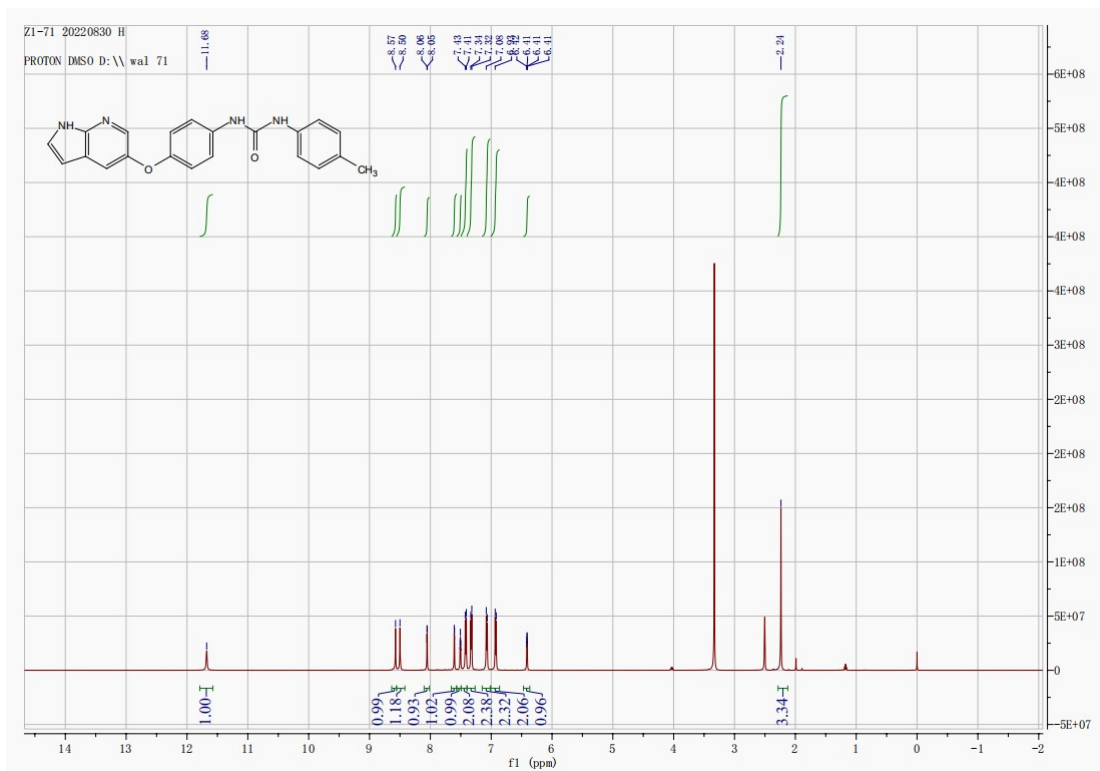

$^1\text{H}$  NMR spectrum of **33**

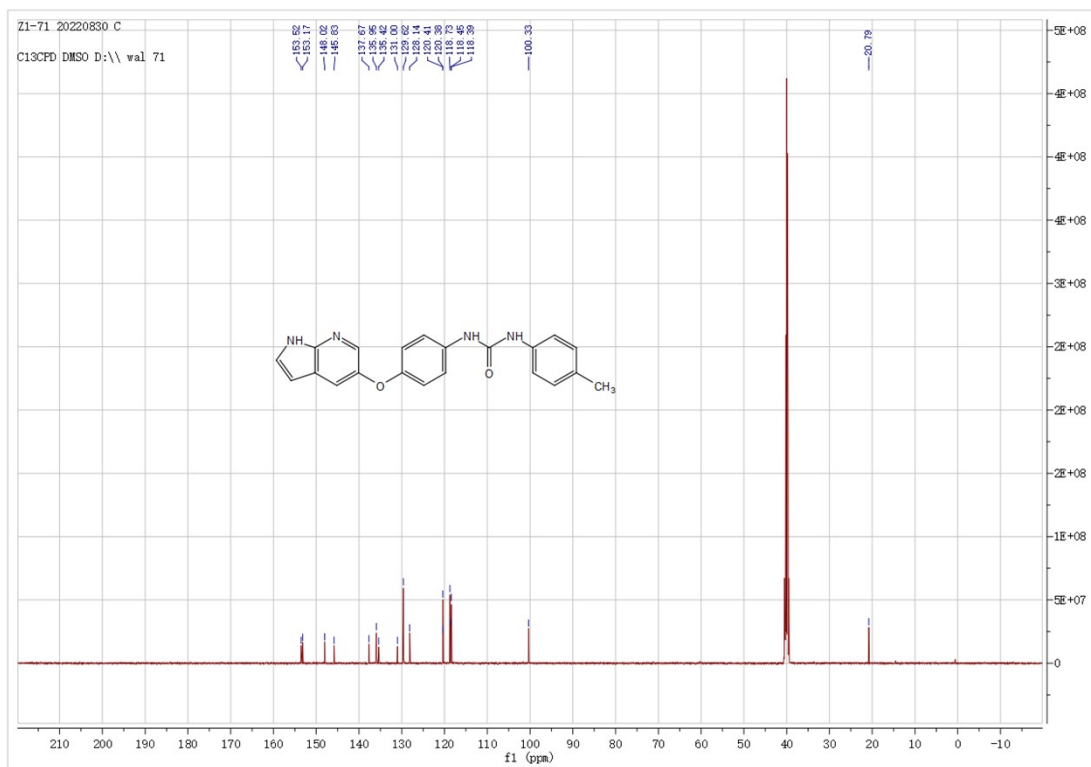

$^{13}\text{C}$  NMR spectrum of **33**

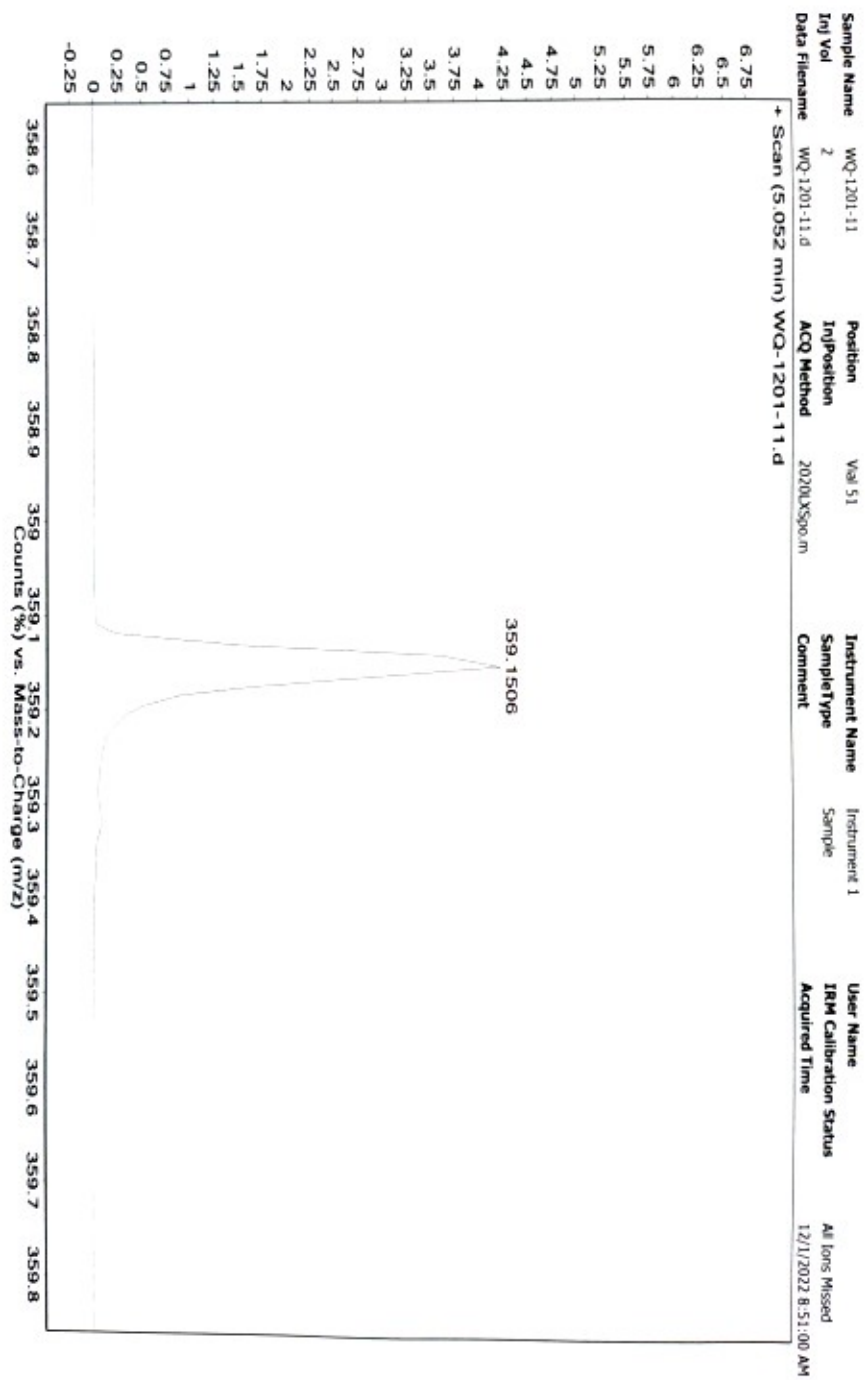

(M+H)<sup>+</sup>: 359.1503  
 C<sub>21</sub>H<sub>18</sub>N<sub>4</sub>O<sub>2</sub>  
 0720-2

HRMS (ESI) spectrum of 33



1-(4-((1H-pyrrolo[2,3-b]pyridin-5-yl)oxy)phenyl)-3-(4-(trifluoromethyl)phenyl)urea

(34)

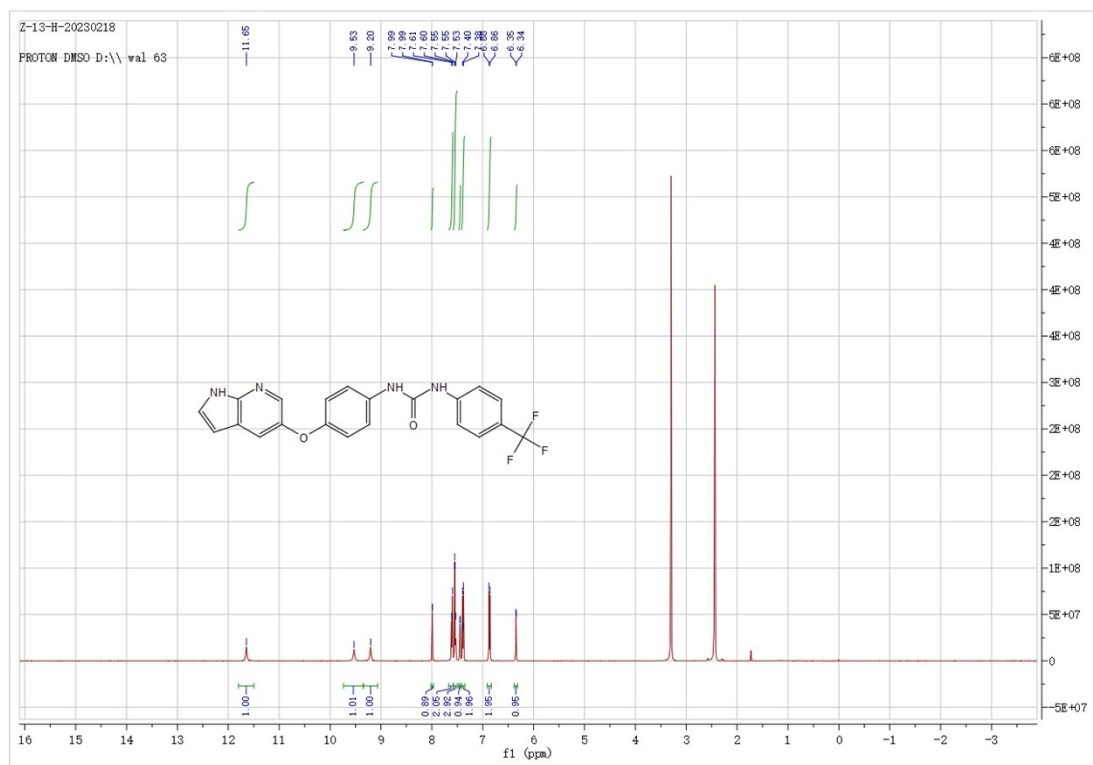

<sup>1</sup>H NMR spectrum of 34

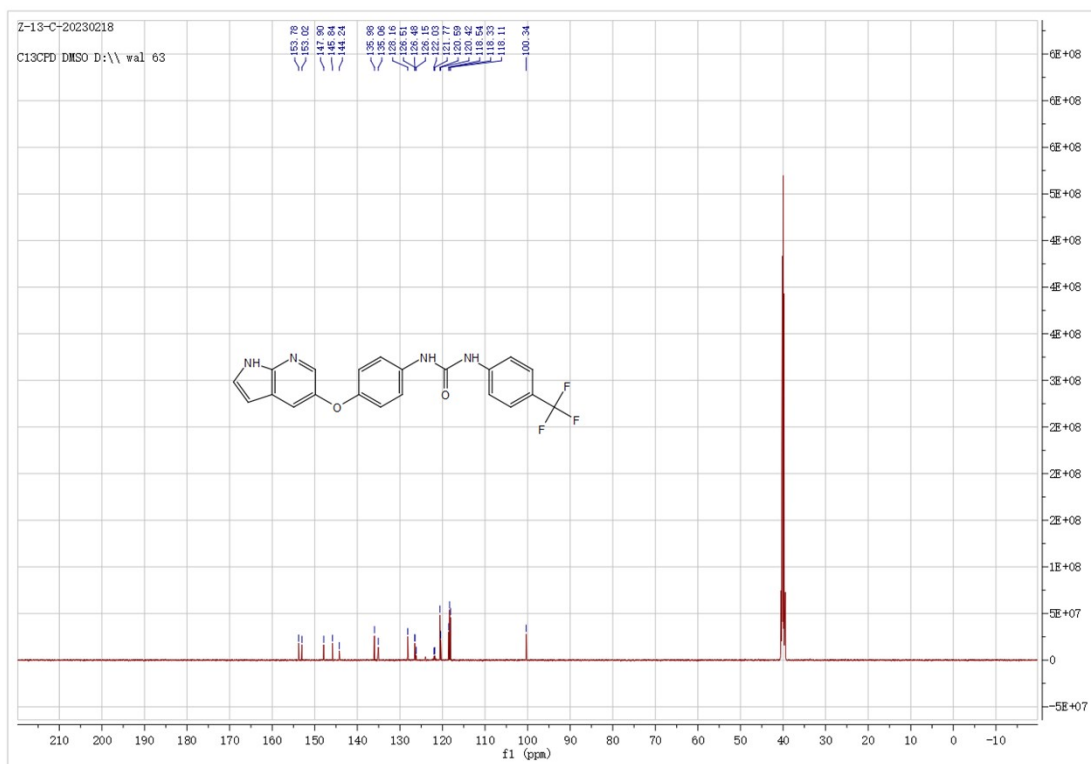

<sup>13</sup>C NMR spectrum of 34

7

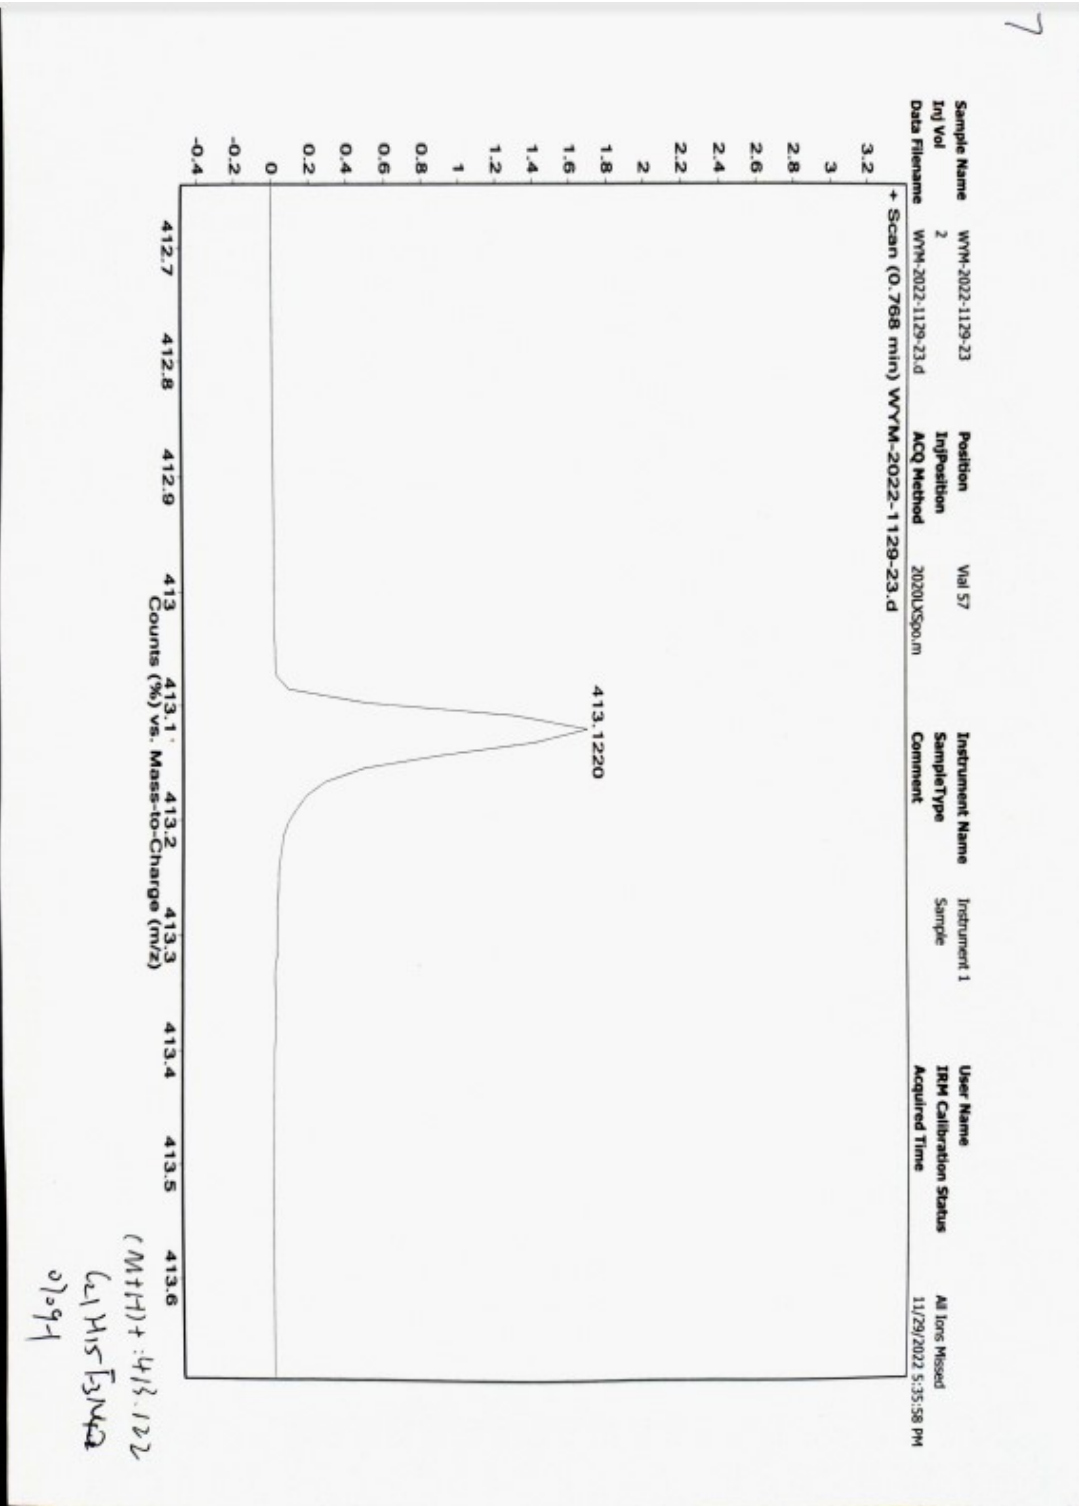

HRMS (ESI) spectrum of 34

*1-(4-((1H-pyrrolo[2,3-b]pyridin-5-yl)oxy)phenyl)-3-(4-methoxyphenyl)urea (35)*

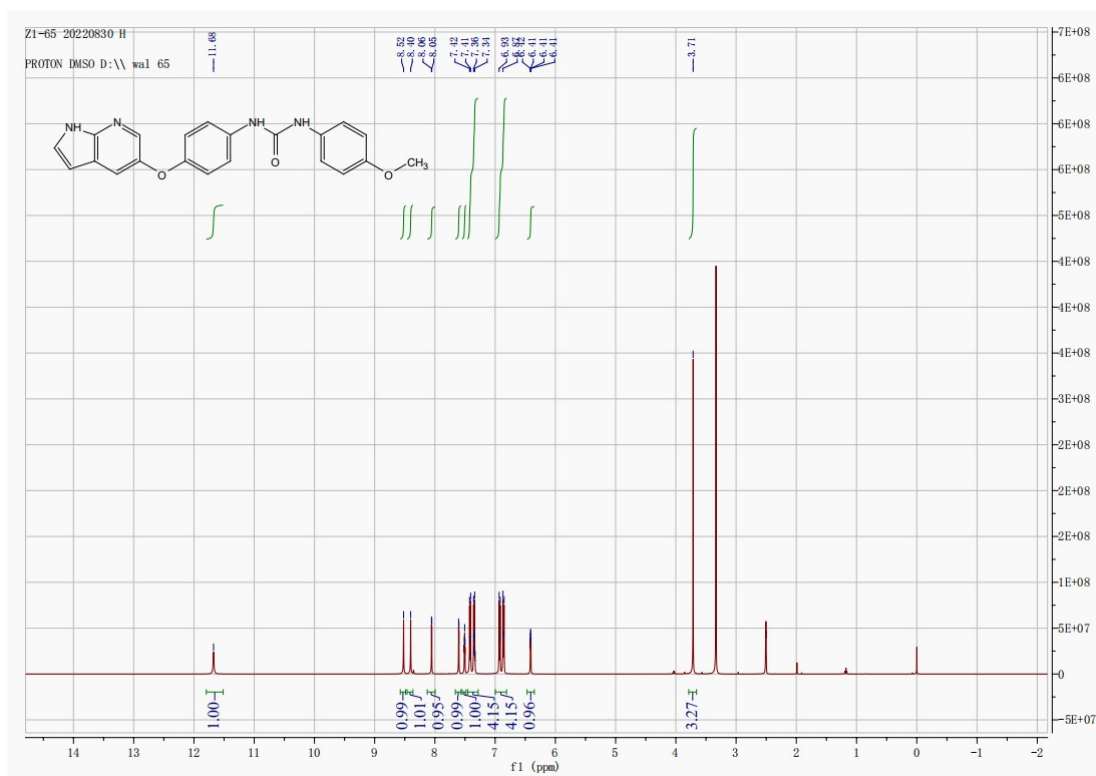

<sup>1</sup>H NMR spectrum of 35

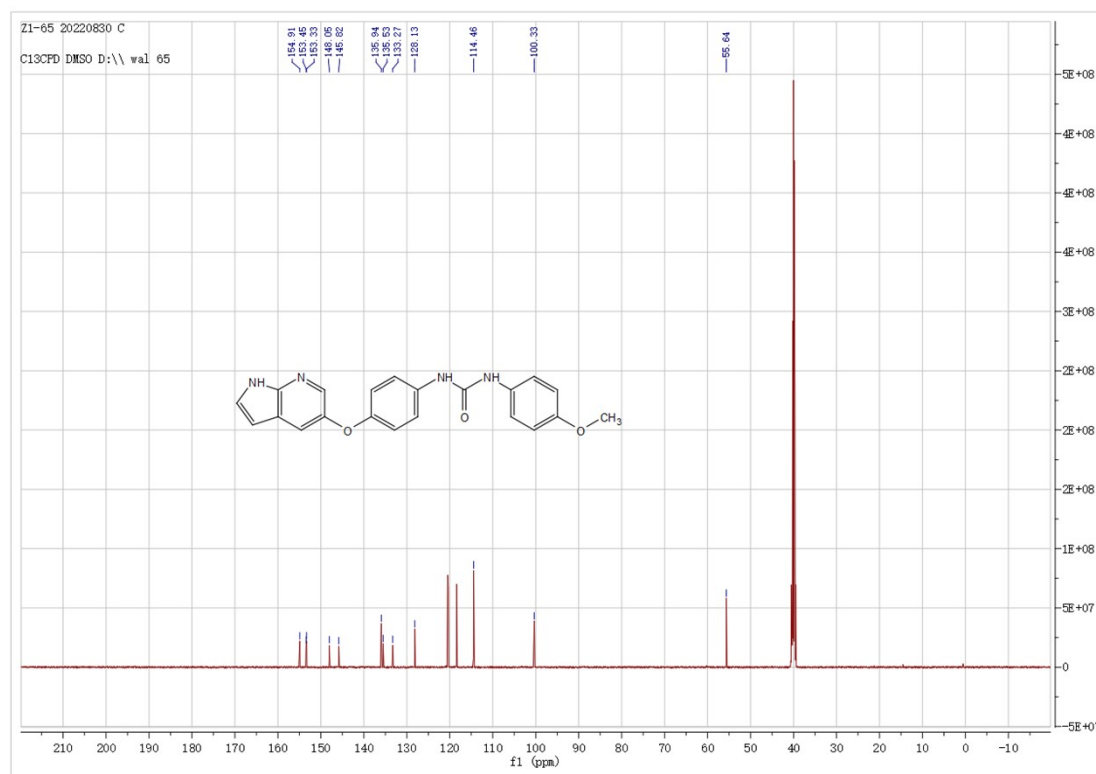

<sup>13</sup>C NMR spectrum of 35

15

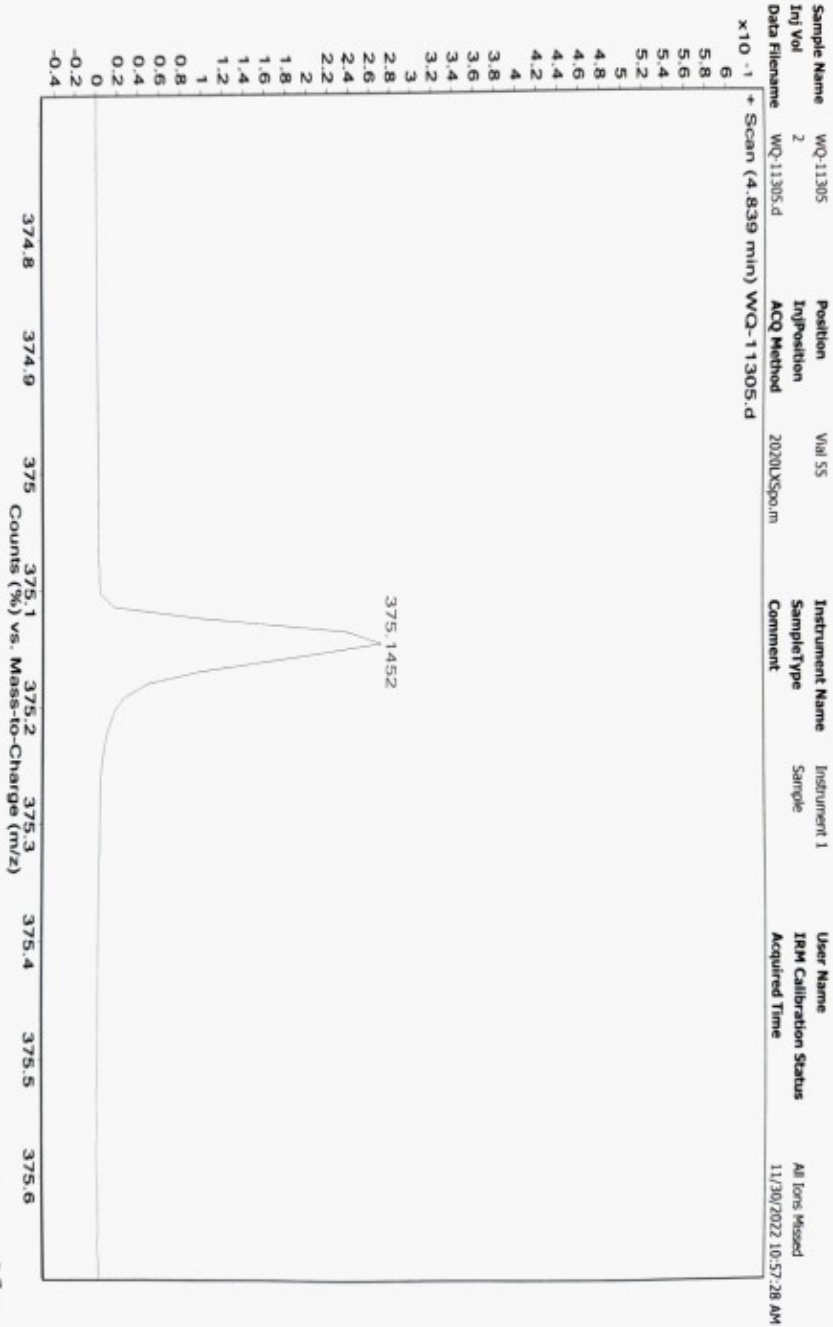

Sample Name WQ-11305  
Inj Vol 2  
Data Filename WQ-11305.D  
Position InjPosition  
ACQ Method 2020LXSp.m  
Vial 55  
Instrument Name Instrument 1  
SampleType Sample  
Comment  
User Name  
IRM Calibration Status  
Acquired Time 11/30/2022 10:57:28 AM  
All Ions Mixed

x10<sup>-1</sup>

374.8 374.9 375 375.1 375.2 375.3 375.4 375.5 375.6

Counts (%) vs. Mass-to-Charge (m/z)

375.1452

(M+H)<sup>+</sup>: 375.1452  
C<sub>21</sub>H<sub>18</sub>N<sub>4</sub>O<sub>3</sub>  
07/6-3

HRMS (ESI) spectrum of 35

1-(4-((1H-pyrrolo[2,3-b]pyridin-5-yl)oxy)phenyl)-3-(3-chloro-4-fluorophenyl)urea

(36)

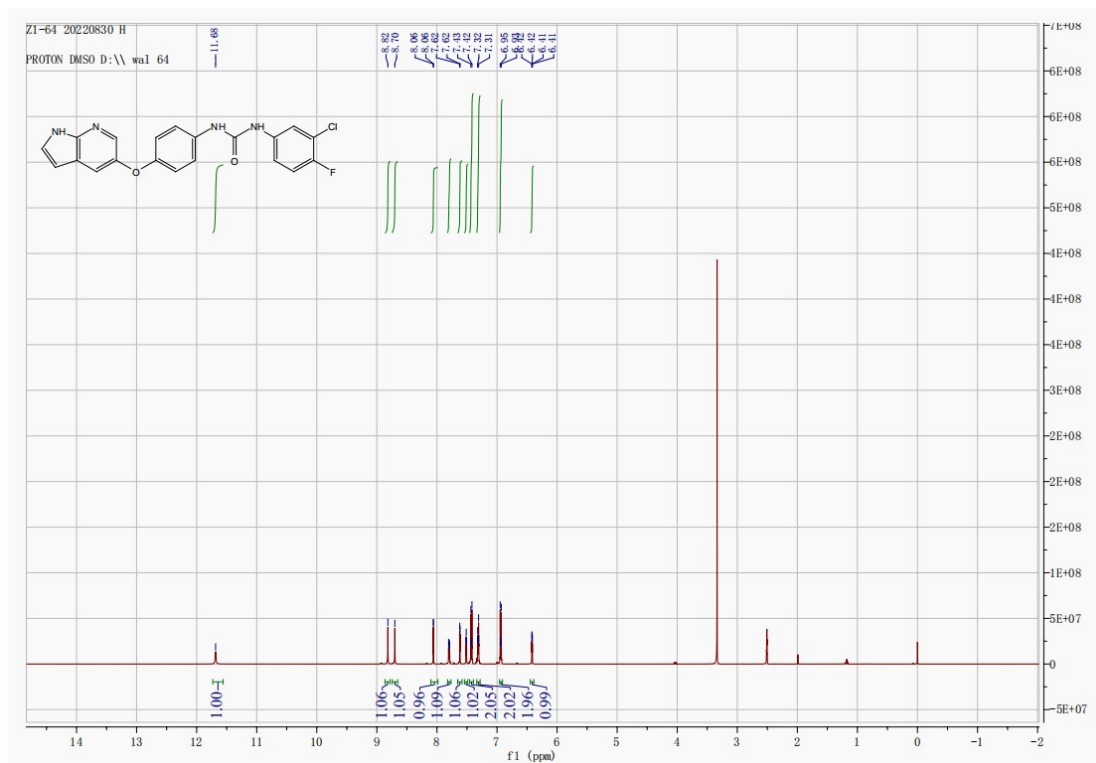

<sup>1</sup>H NMR spectrum of **36**

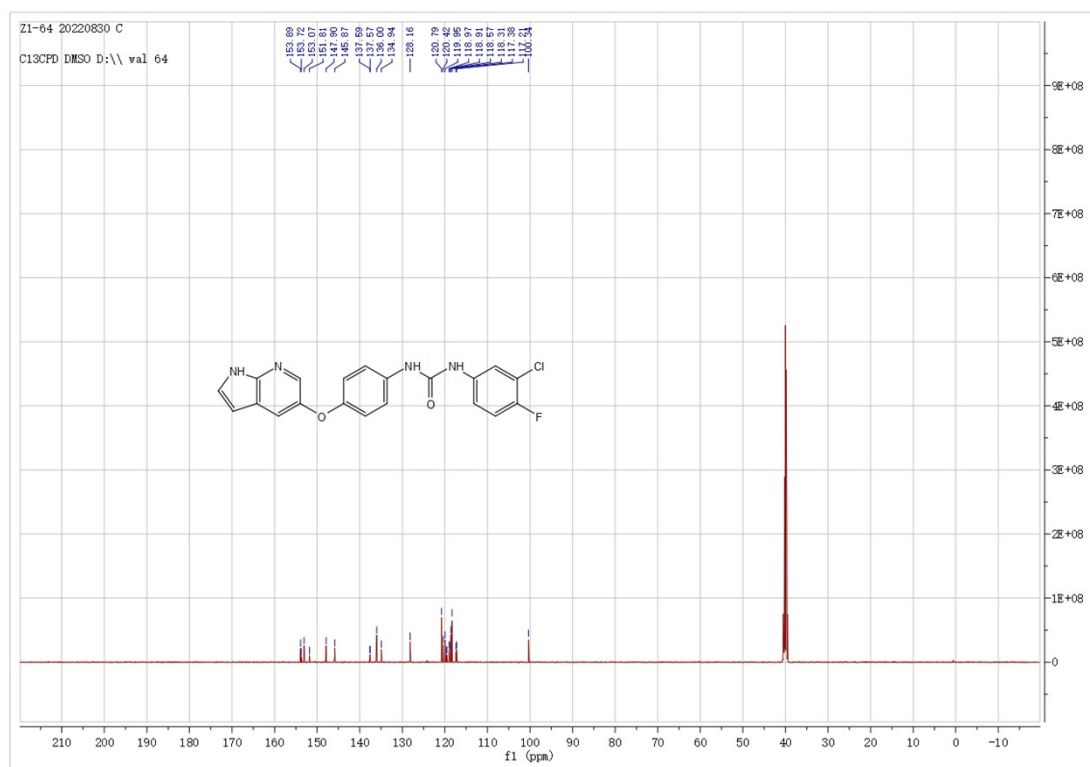

<sup>13</sup>C NMR spectrum of **36**

114

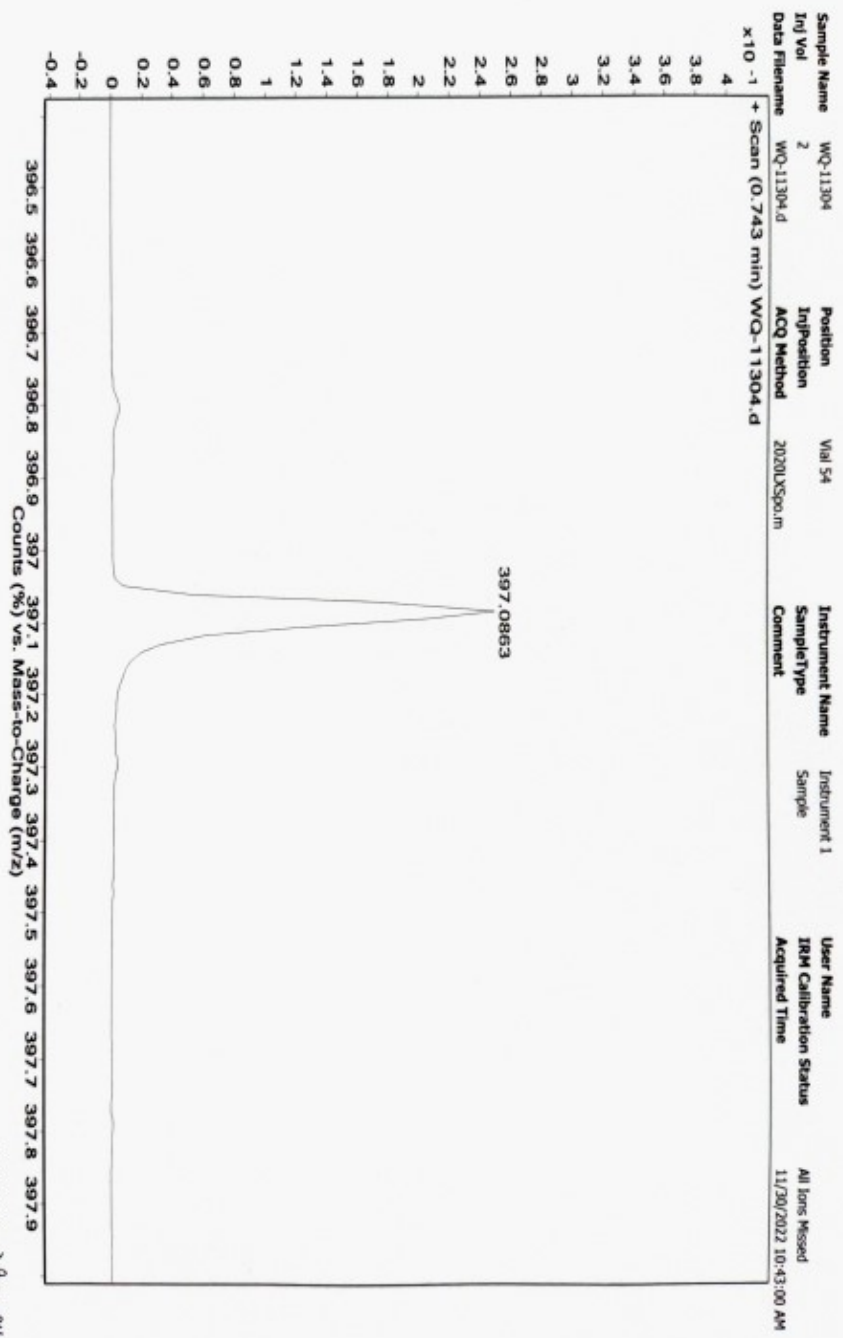

(M+H)<sup>+</sup>: 397.0862  
C<sub>20</sub>H<sub>14</sub>O<sub>2</sub>  
07/16-2

HRMS (ESI) spectrum of 36

1-(4-((1H-pyrrolo[2,3-b]pyridin-5-yl)oxy)phenyl)-3-(4-chloro-3-(trifluoromethyl)phenyl)urea (**37**)

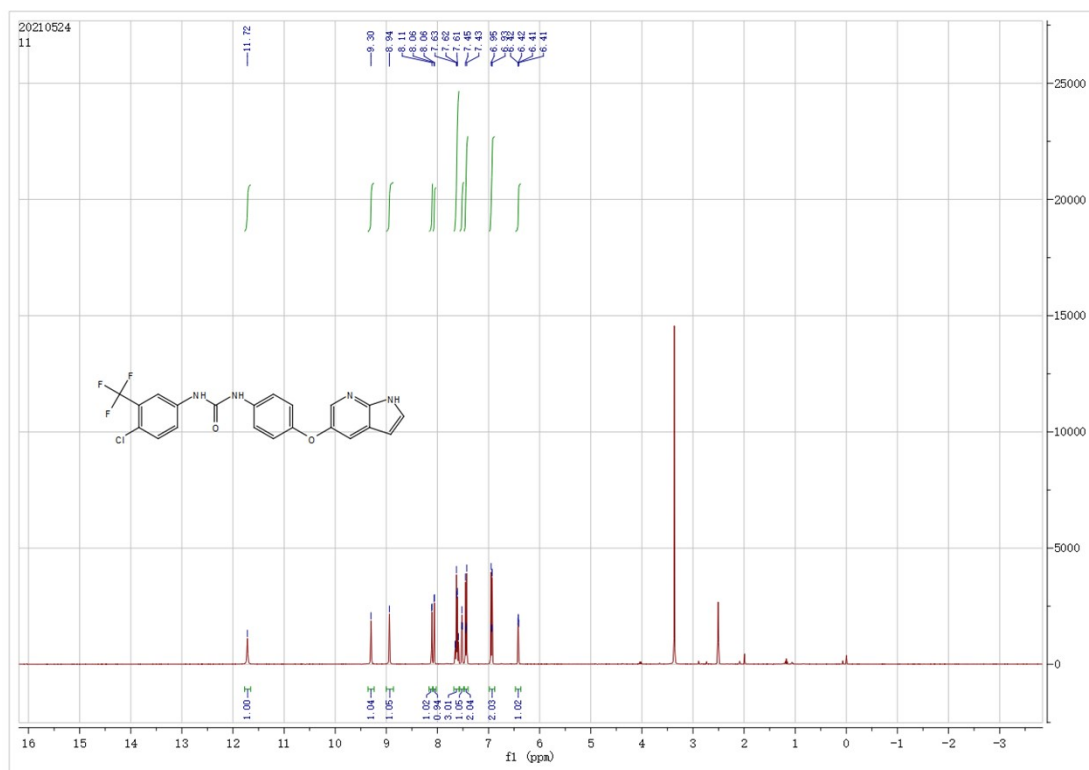

<sup>1</sup>H NMR spectrum of **37**

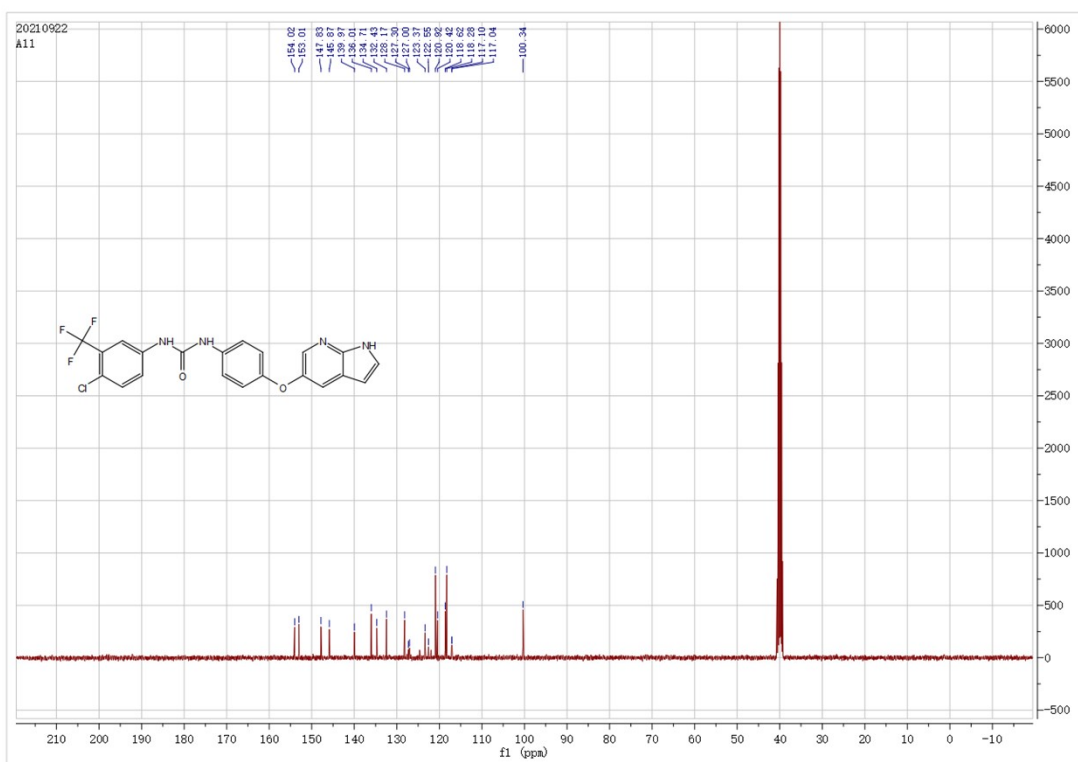

<sup>13</sup>C NMR spectrum of **37**

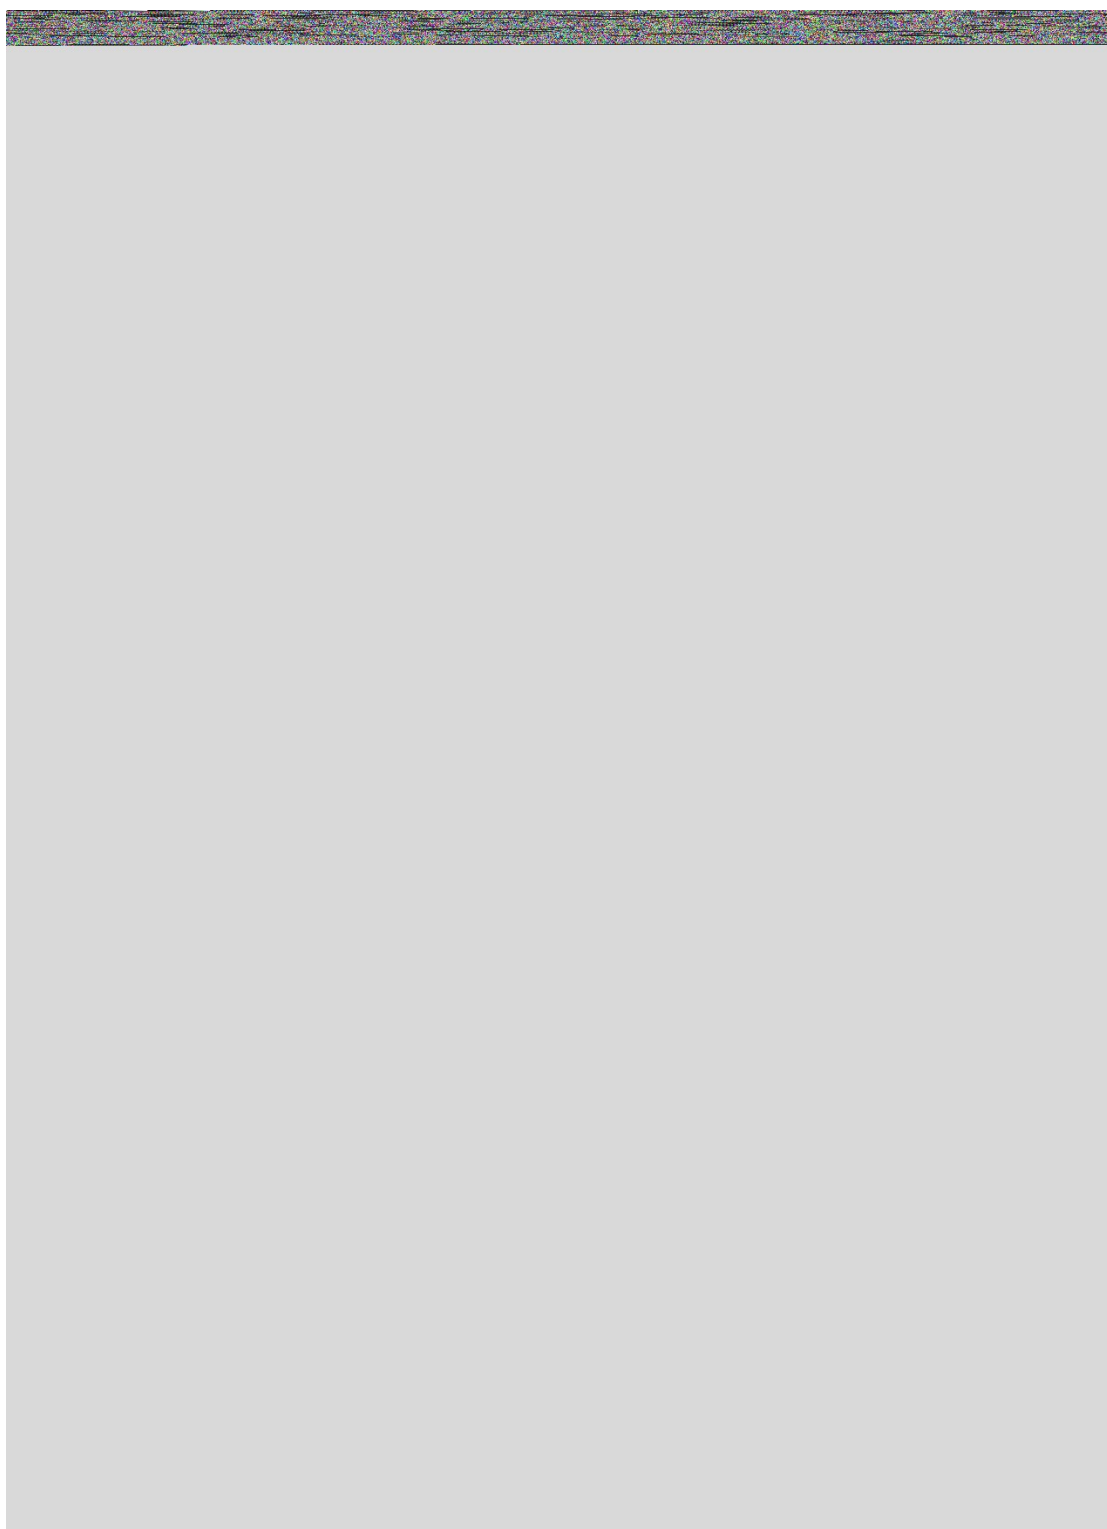

HRMS (ESI) spectrum of **37**



1-(4-((1H-pyrrolo[2,3-b]pyridin-5-yl)oxy)phenyl)-3-(3-chloro-4-methylphenyl)urea

(38)

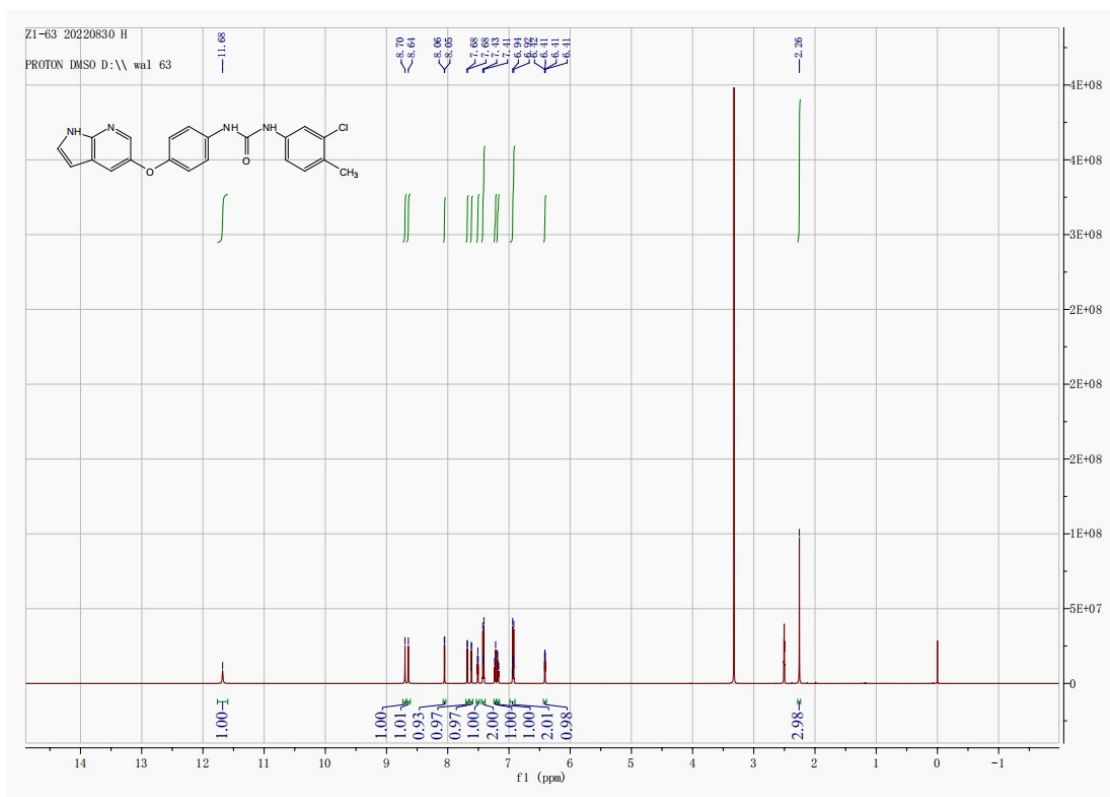

<sup>1</sup>H NMR spectrum of **38**

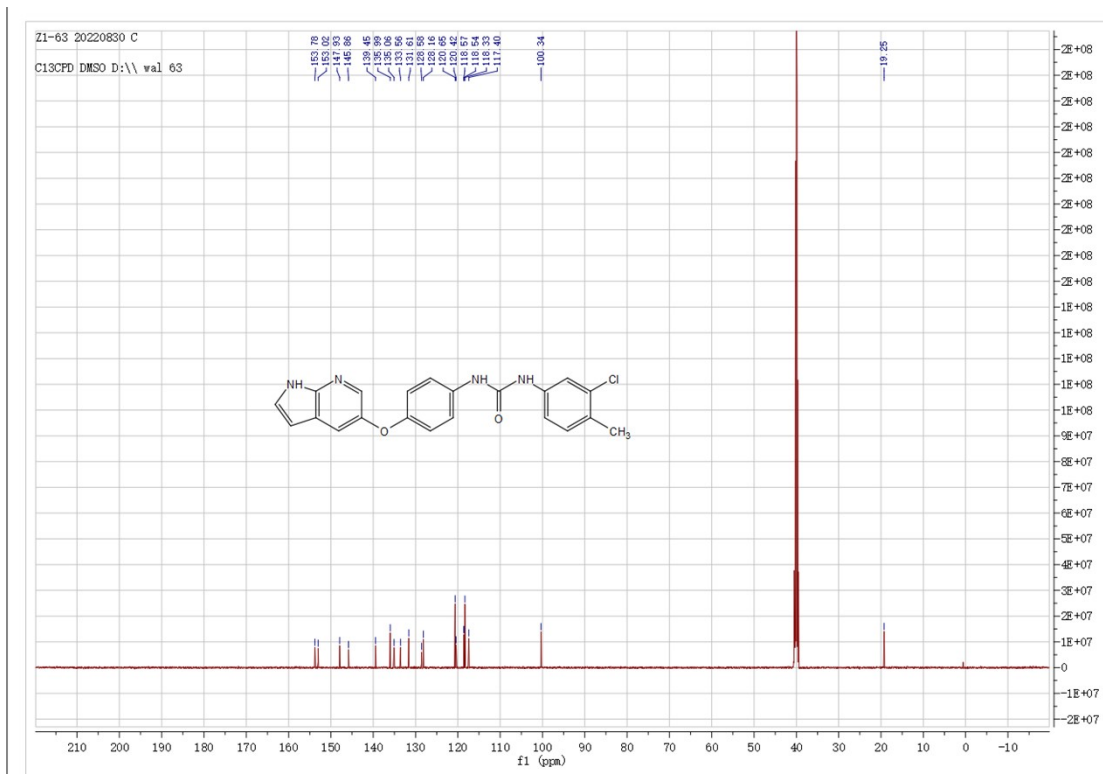

<sup>13</sup>C NMR spectrum of **38**

13

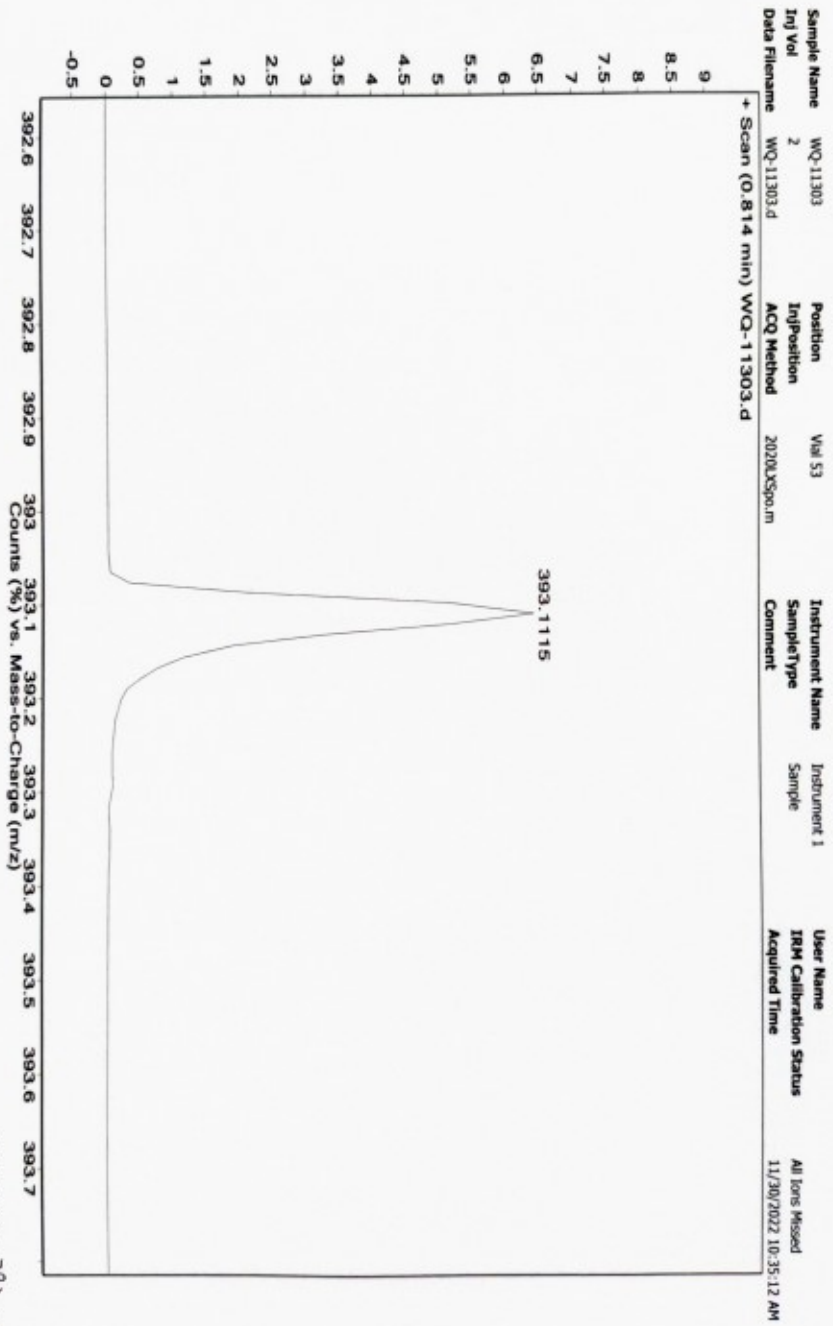

(M+H)<sup>+</sup> : 393.1113  
C<sub>11</sub>H<sub>17</sub>O<sub>2</sub>N<sub>4</sub><sub>2</sub>  
316-1

HRMS (ESI) spectrum of 38

*1-(4-((1H-pyrrolo[2,3-b]pyridin-5-yl)oxy)phenyl)-3-(4-methyl-3-(trifluoromethyl)phenyl)urea (39)*

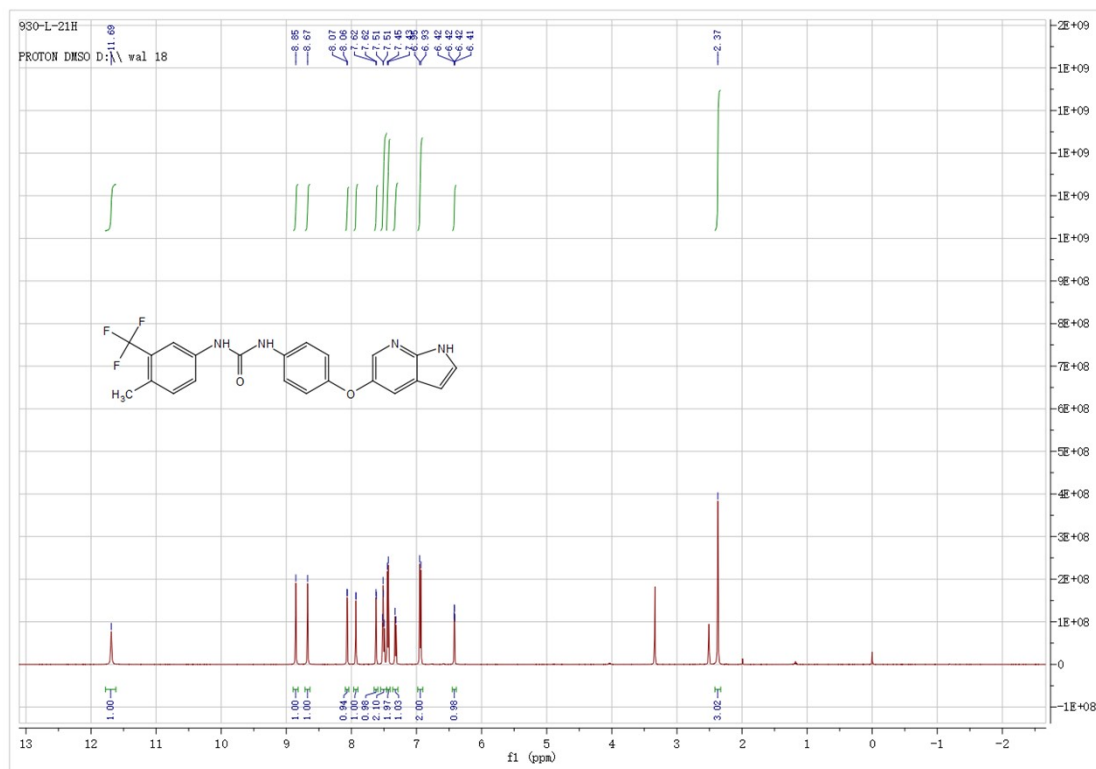

$^1\text{H}$  NMR spectrum of **39**

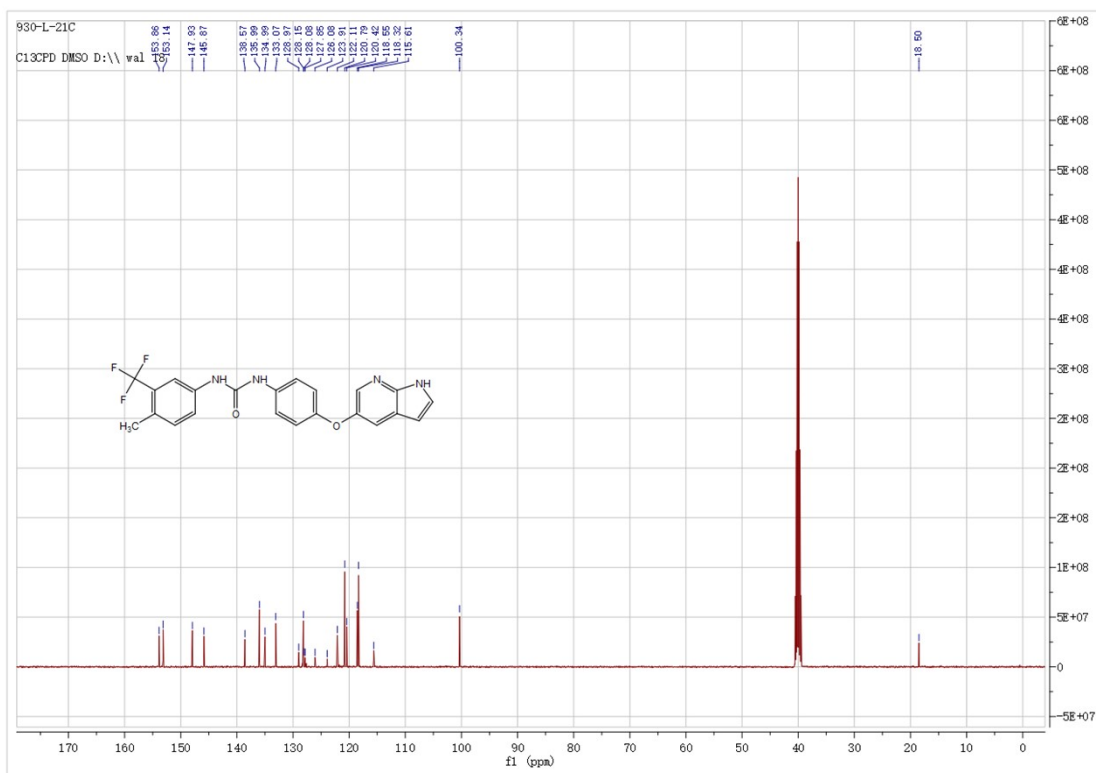

$^{13}\text{C}$  NMR spectrum of **39**



C22H17N4O2F3  
CA(MH+): 427.376  
All Ions Missed  
7/29/2021 10:11:56 AM

Sample Name ZX-0729-11  
Inj Vol 2  
Data Filename ZX-0729-11.d  
Position InjPosition  
ACQ Method  
Vial 41  
2020LXSp0.m  
Instrument Name  
SampleType  
Comment  
Instrument 1  
Sample  
User Name  
IRM Calibration Status  
Acquired Time

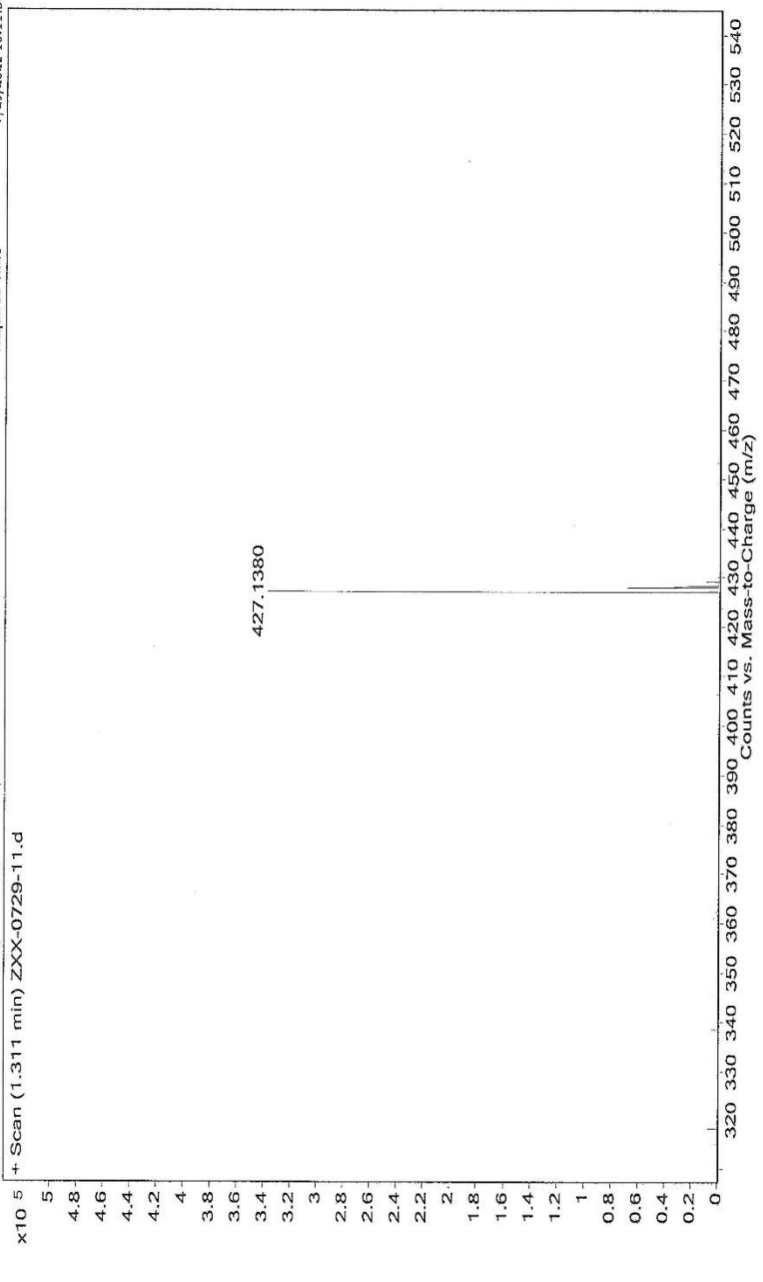

HRMS (ESI) spectrum of 39

0605-3

1-(4-((1H-pyrrolo[2,3-b]pyridin-5-yl)oxy)phenyl)-3-(3,4-dichlorophenyl)urea (40)

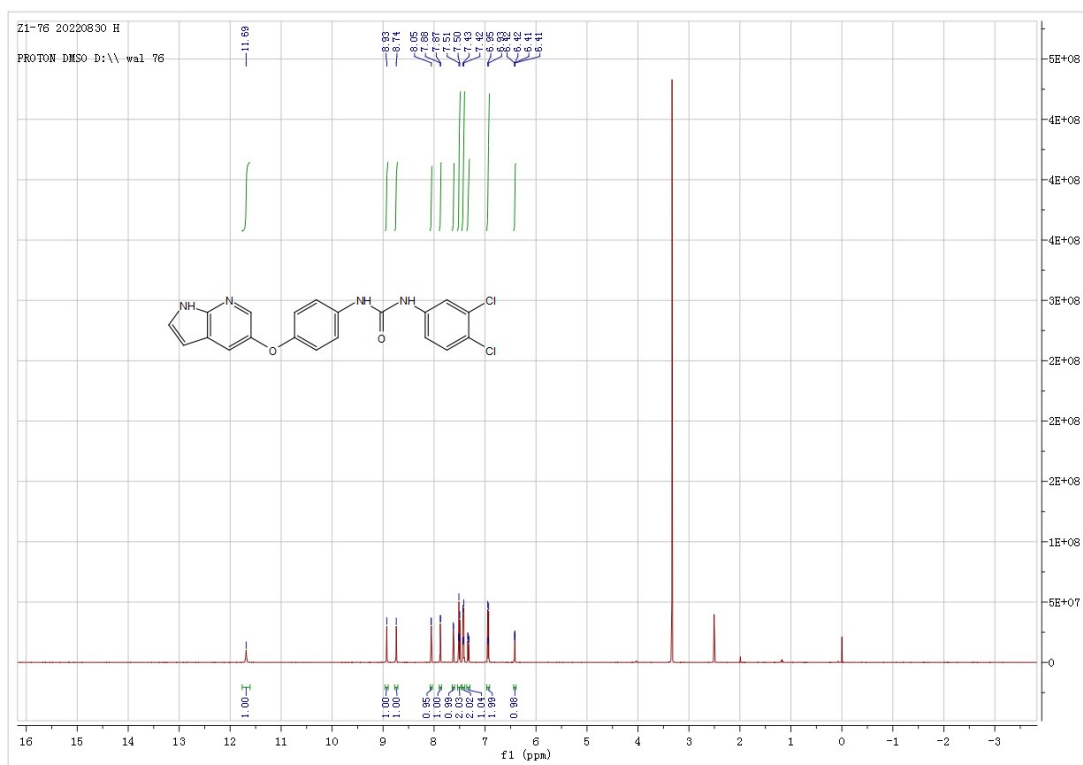

<sup>1</sup>H NMR spectrum of 40

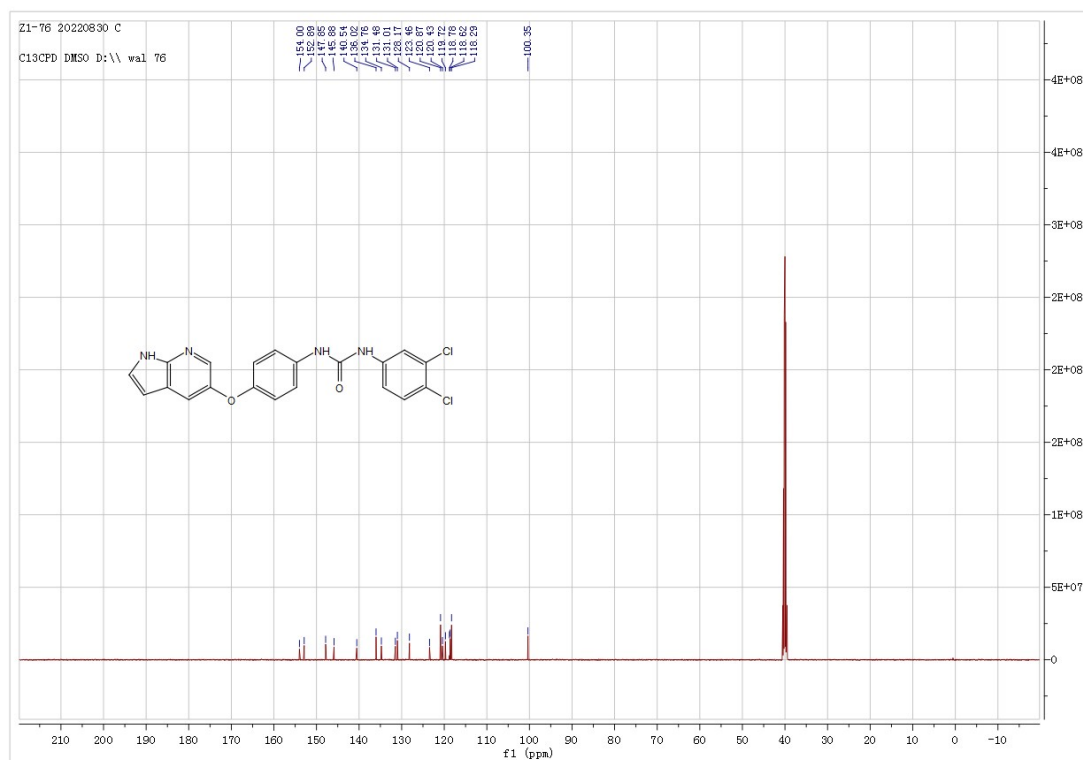

<sup>13</sup>C NMR spectrum of 40

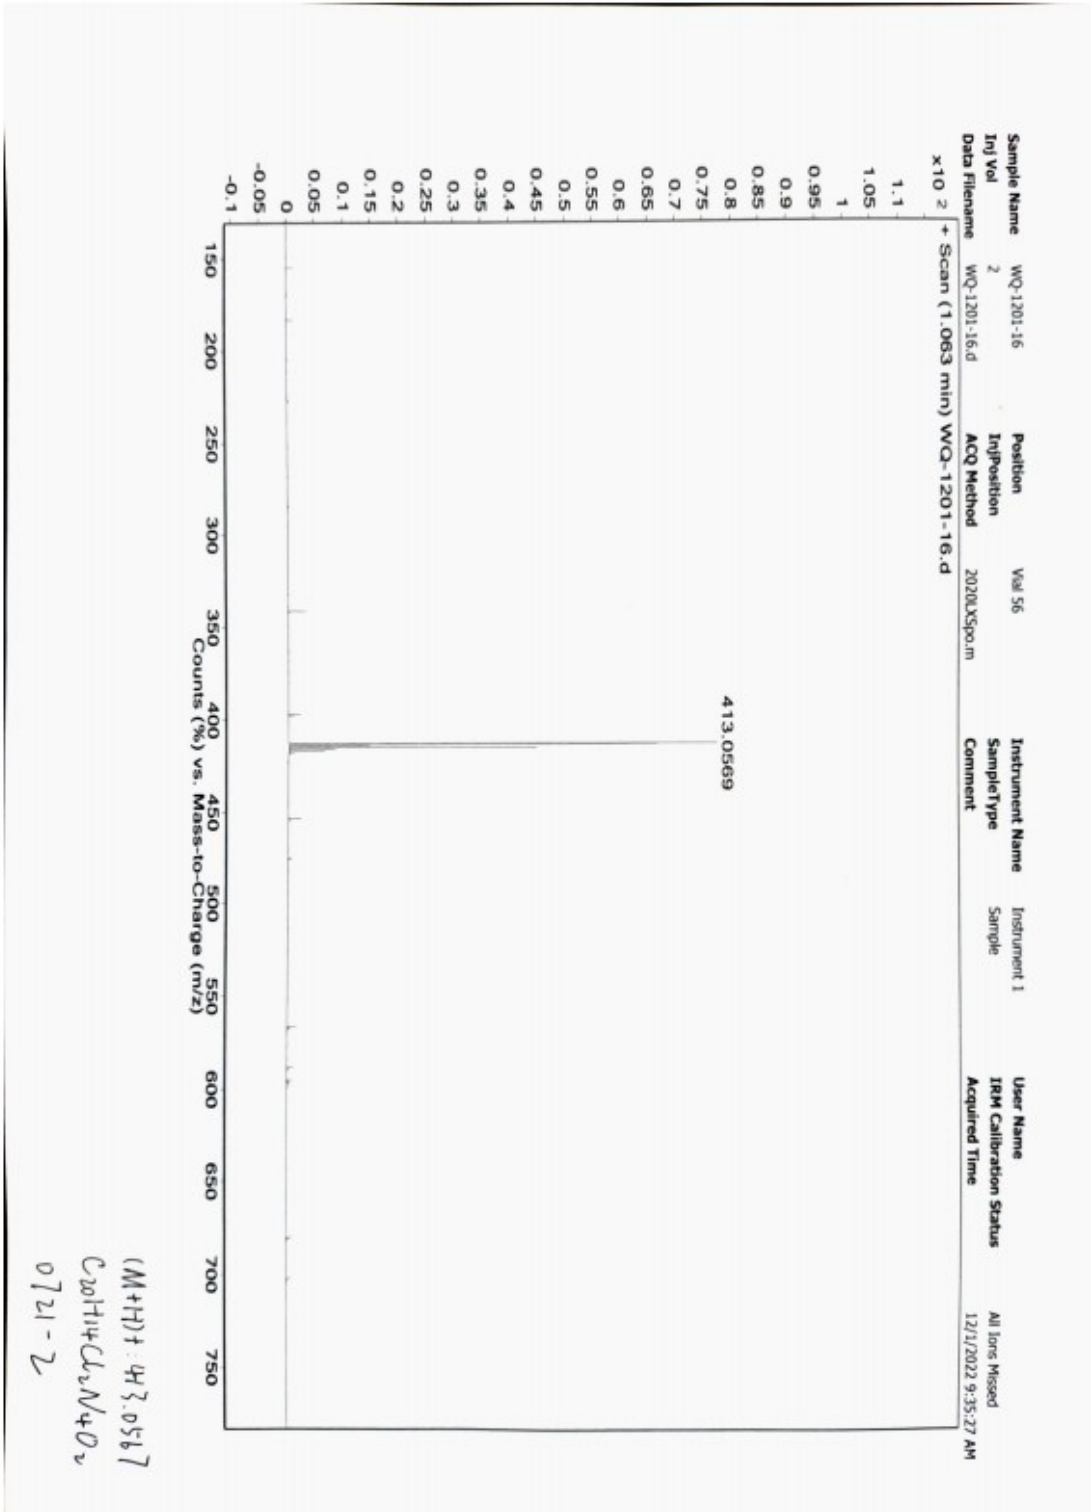

HRMS (ESI) spectrum of 40

*1-(4-((1H-pyrrolo[2,3-b]pyridin-5-yl)oxy)phenyl)-3-(3,5-dichlorophenyl)urea (41)*

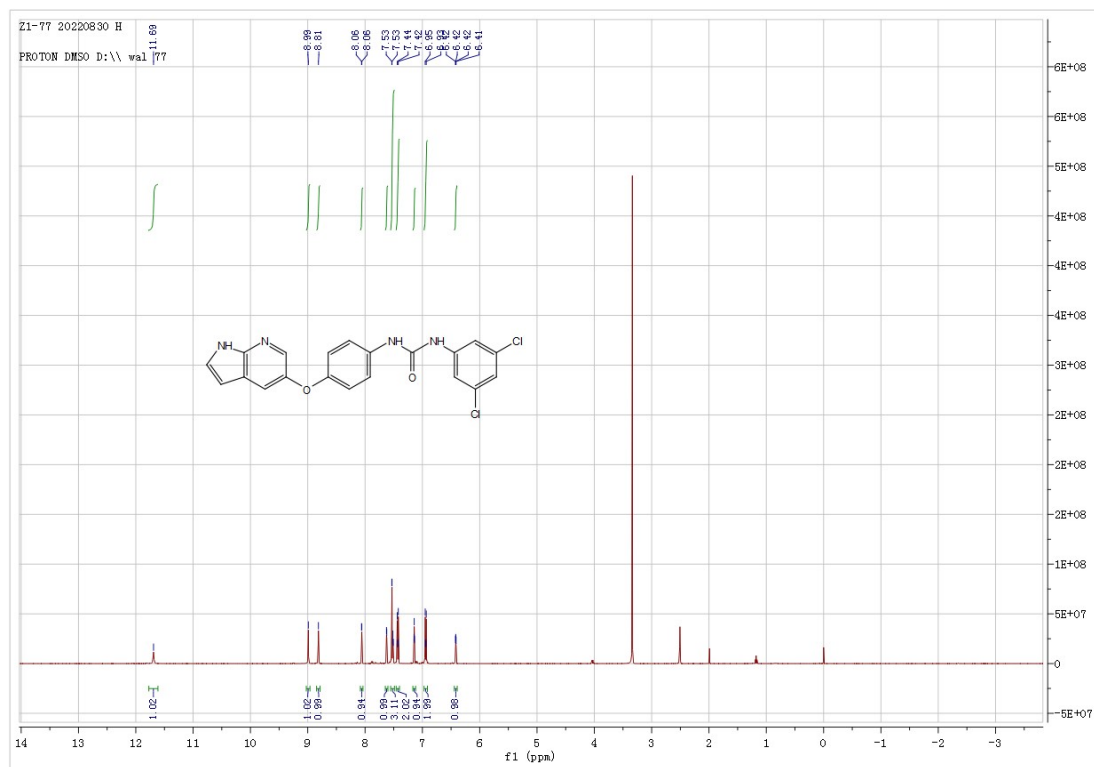

<sup>1</sup>H NMR spectrum of **41**

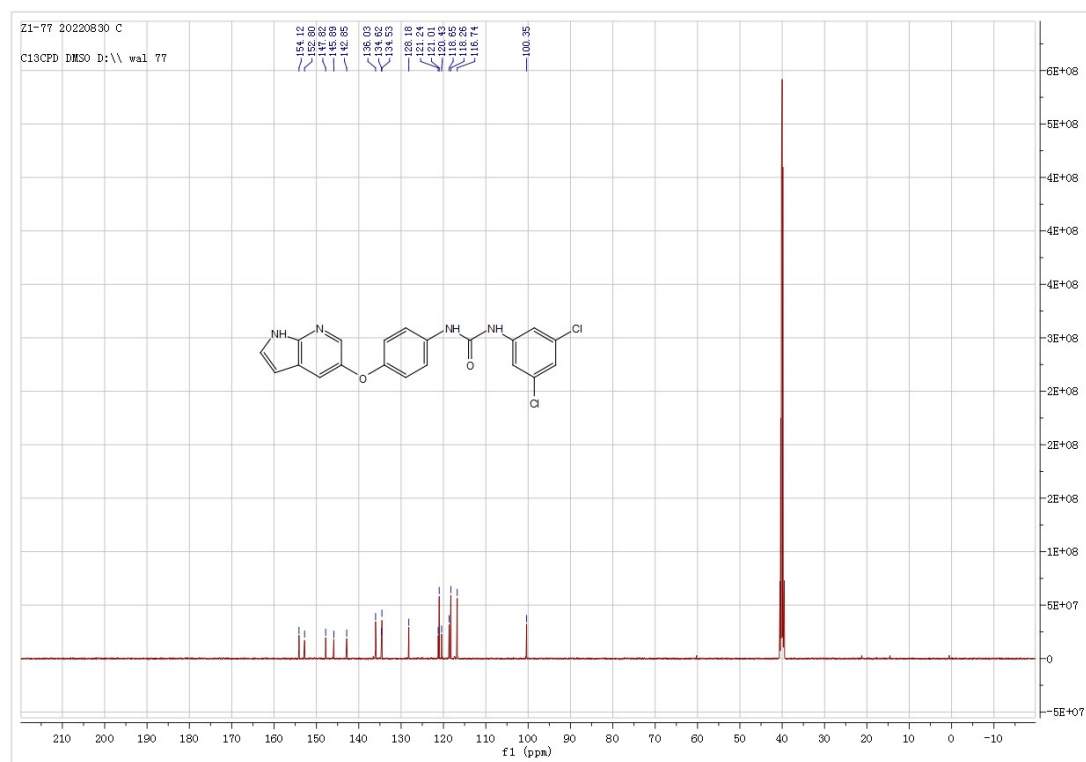

<sup>13</sup>C NMR spectrum of **41**



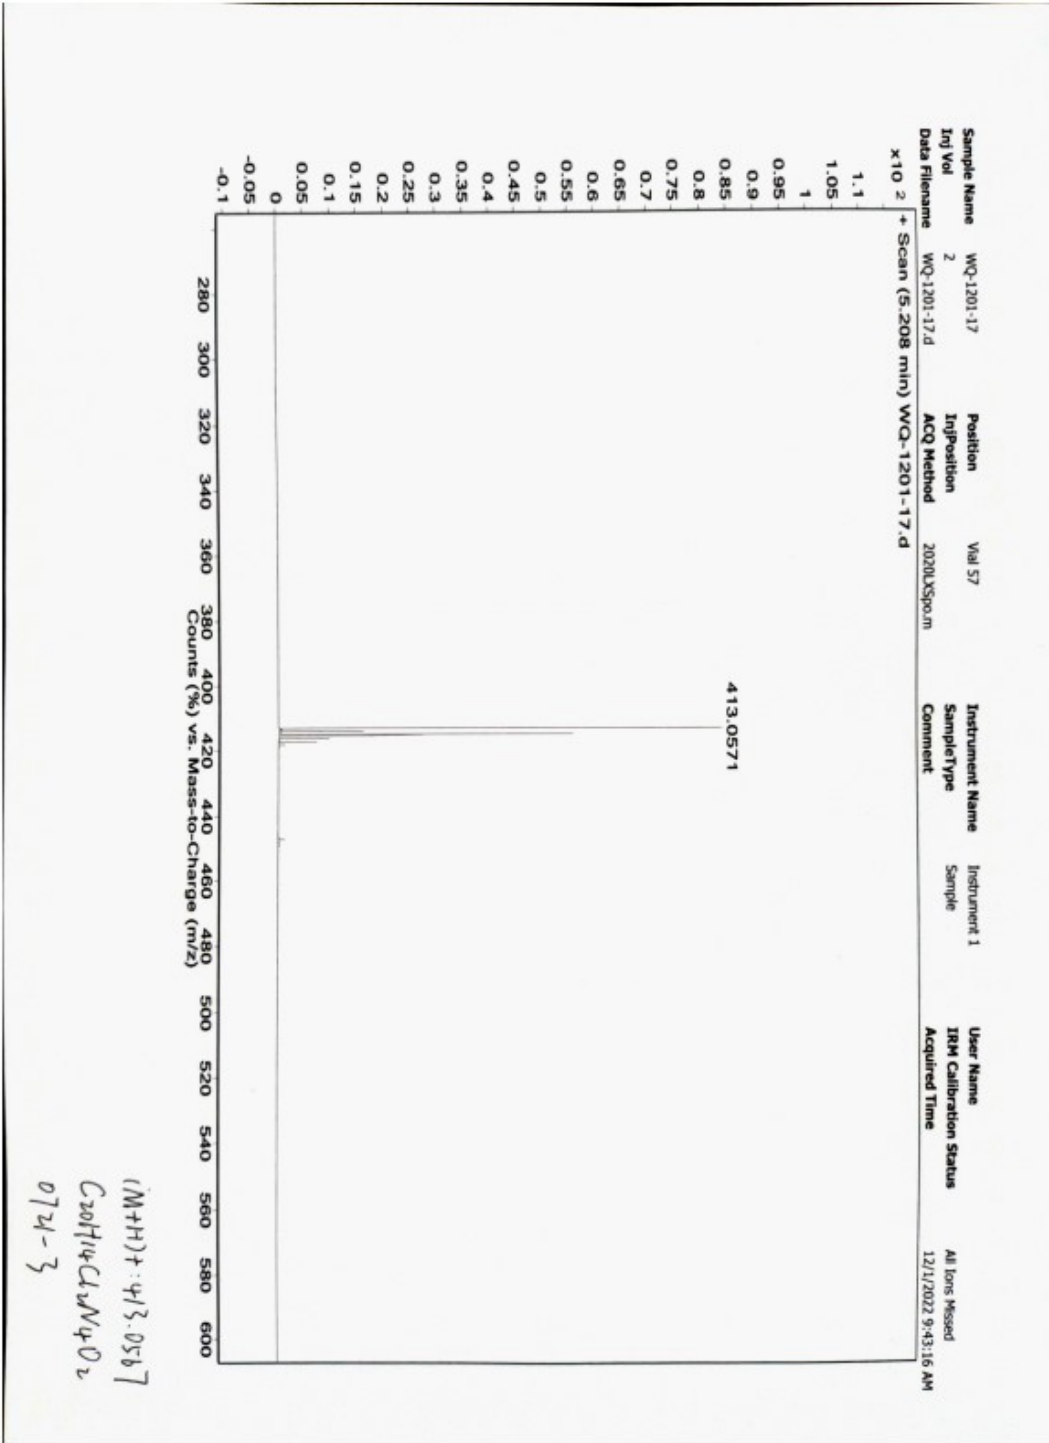

HRMS (ESI) spectrum of 41



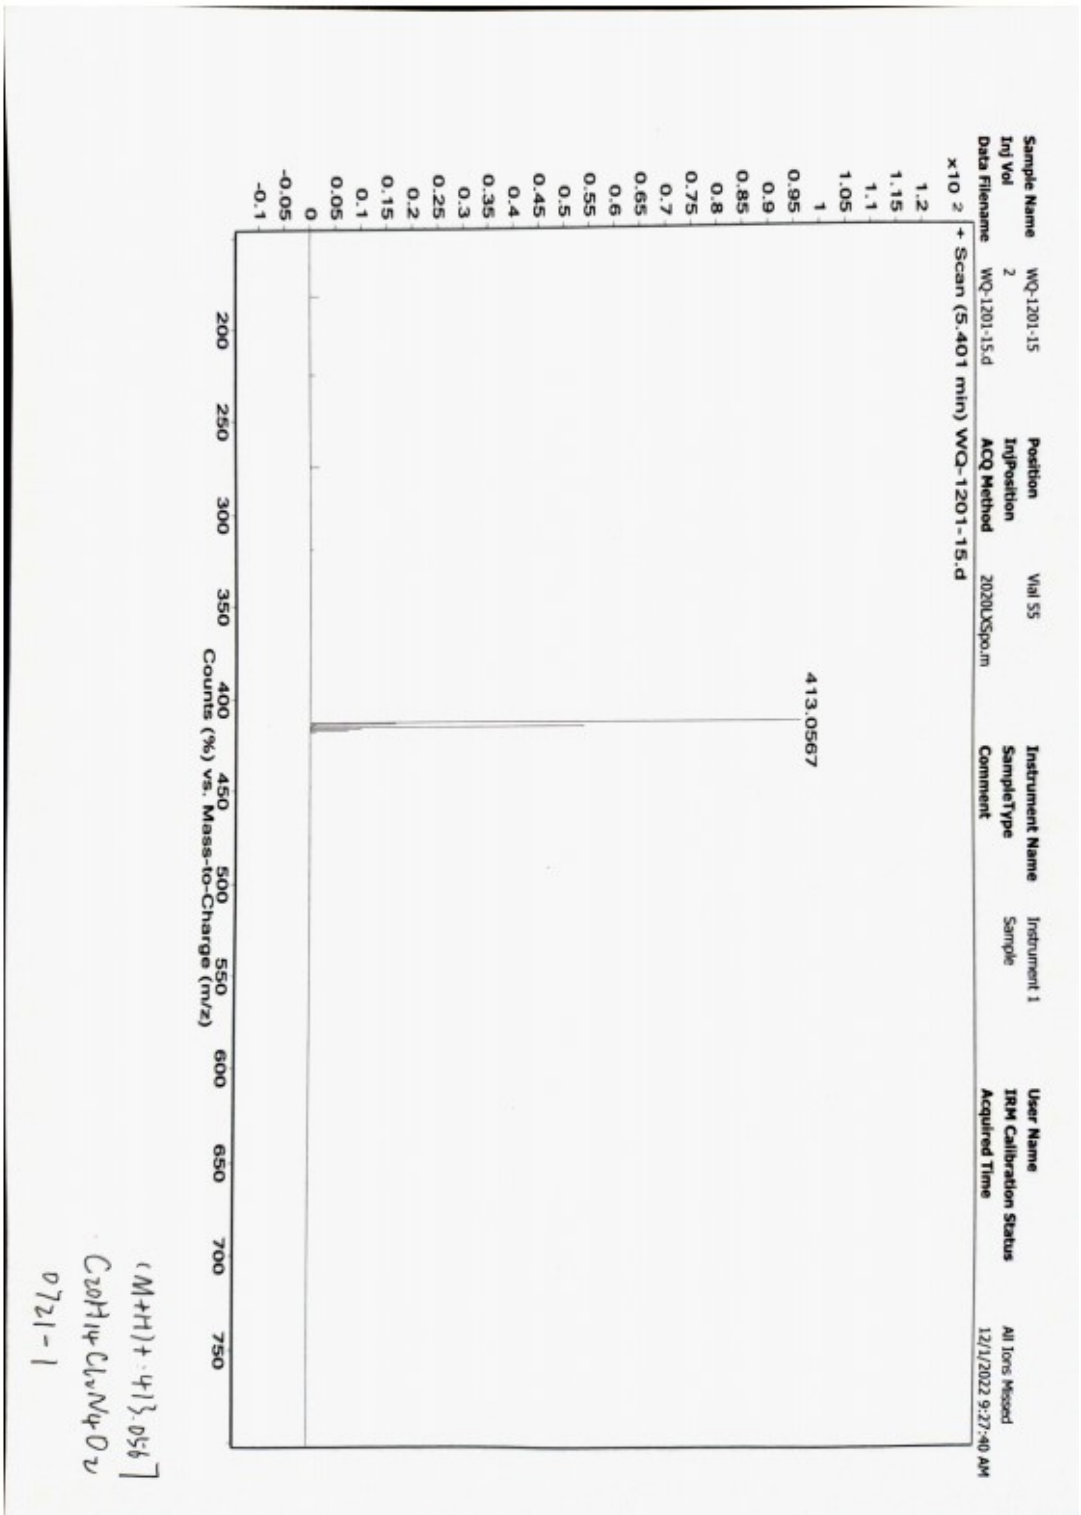

HRMS (ESI) spectrum of 42
